# Supplementary material
Source: publisher figshare collection journal article supplement (https://acs.figshare.com/ndownloader/files/4789546)

*Supporting Information for*

**Limonoids and Triterpenoids as 11 $\beta$ -HSD1 Inhibitors from**  
***Walsura robusta***

Guo-Cai Wang, Jin-Hai Yu, Yu Shen, Ying Leng, Hua Zhang,\* and Jian-Min Yue\*

*State Key Laboratory of Drug Research, Shanghai Institute of Materia Medica, Chinese Academy of Sciences, 555 ZuChongZhi Road, Shanghai 201203, People's Republic of China*

**Table S1.**  $^1\text{H}$  and  $^{13}\text{C}$  NMR spectroscopic Data of compounds **2** and **10** in  $\text{CDCl}_3$

**Table S2.** Preliminary assay results of tested compounds against human 11 $\beta$ -HSD1 at 10  $\mu\text{M}$ .

**Table S3.** Preliminary assay results of tested compounds against mouse 11 $\beta$ -HSD1 at 10  $\mu\text{M}$ .

**Table S4.** X-ray crystallographic data for walsunoid D (**4**)

**Table S5.** X-ray crystallographic data for compound **10**

**Figure S1.**  $^1\text{H}$  NMR spectrum of walsunoid A (**1**) in  $\text{CDCl}_3$

**Figure S2.**  $^{13}\text{C}$  NMR spectrum of walsunoid A (**1**) in  $\text{CDCl}_3$

**Figure S3.** HSQC spectrum of walsunoid A (**1**) in  $\text{CDCl}_3$

**Figure S4.** HMBC spectrum of walsunoid A (**1**) in  $\text{CDCl}_3$

**Figure S5.**  $^1\text{H}$ - $^1\text{H}$  COSY spectrum of walsunoid A (**1**) in  $\text{CDCl}_3$

**Figure S6.** ROESY spectrum of walsunoid A (**1**) in  $\text{CDCl}_3$

**Figure S7.** (+)-ESIMS spectrum of walsunoid A (**1**)

**Figure S8.** (–)-ESIMS spectrum of walsunoid A (**1**)

**Figure S9.** (–)-HRESIMS spectrum of walsunoid A (**1**)

**Figure S10.** IR spectrum of walsunoid A (**1**)

**Figure S11.**  $^1\text{H}$  NMR spectrum of walsunoid B (**2**) in  $\text{CDCl}_3$

**Figure S12.**  $^{13}\text{C}$  NMR spectrum of walsunoid B (**2**) in  $\text{CDCl}_3$

**Figure S13.**  $^1\text{H}$  NMR spectrum of walsunoid B (**2**) in  $\text{C}_5\text{D}_5\text{N}$

**Figure S14.**  $^{13}\text{C}$  NMR spectrum of walsunoid B (**2**) in  $\text{C}_5\text{D}_5\text{N}$

**Figure S15.** HSQC spectrum of walsunoid B (**2**) in C<sub>5</sub>D<sub>5</sub>N

**Figure S16.** HMBC spectrum of walsunoid B (**2**) in C<sub>5</sub>D<sub>5</sub>N

**Figure S17.** NOESY spectrum of walsunoid B (**2**) in C<sub>5</sub>D<sub>5</sub>N

**Figure S18.** (+)-ESIMS spectrum of walsunoid B (**2**)

**Figure S19.** (–)-ESIMS spectrum of walsunoid B (**2**)

**Figure S20.** (–)-HRESIMS spectrum of walsunoid B (**2**)

**Figure S21.** IR spectrum of walsunoid B (**2**)

**Figure S22.** <sup>1</sup>H NMR spectrum of walsunoid C (**3**) in C<sub>5</sub>D<sub>5</sub>N

**Figure S23.** <sup>13</sup>C NMR spectrum of walsunoid C (**3**) in C<sub>5</sub>D<sub>5</sub>N

**Figure S24.** HSQC spectrum of walsunoid C (**3**) in C<sub>5</sub>D<sub>5</sub>N

**Figure S25.** HMBC spectrum of walsunoid C (**3**) in C<sub>5</sub>D<sub>5</sub>N

**Figure S26.** NOESY spectrum of walsunoid C (**3**) in C<sub>5</sub>D<sub>5</sub>N

**Figure S27.** (+)-ESIMS spectrum of walsunoid C (**3**)

**Figure S28.** (–)-ESIMS spectrum of walsunoid C (**3**)

**Figure S29.** (–)-HRESIMS spectrum of walsunoid C (**3**)

**Figure S30.** IR spectrum of walsunoid C (**3**)

**Figure S31.** <sup>1</sup>H NMR spectrum of walsunoid D (**4**) in CDCl<sub>3</sub>

**Figure S32.** <sup>13</sup>C NMR spectrum of walsunoid D (**4**) in CDCl<sub>3</sub>

**Figure S33.** HSQC spectrum of walsunoid D (**4**) in CDCl<sub>3</sub>

**Figure S34.** HMBC spectrum of walsunoid D (**4**) in CDCl<sub>3</sub>

**Figure S35.** NOESY spectrum of walsunoid D (**4**) in CDCl<sub>3</sub>

**Figure S36.** (+)-ESIMS spectrum of walsunoid D (**4**)

**Figure S37.** (–)-ESIMS spectrum of walsunoid D (**4**)

**Figure S38.** (+)-HRESIMS spectrum of walsunoid D (**4**)

**Figure S39.** IR spectrum of walsunoid D (**4**)

**Figure S40.** <sup>1</sup>H NMR spectrum of walsunoid E (**5**) in CDCl<sub>3</sub>

**Figure S41.**  $^{13}\text{C}$  NMR spectrum of e walsunoid E (**5**) in  $\text{CDCl}_3$

**Figure S42.** HSQC spectrum of walsunoid E (**5**) in  $\text{CDCl}_3$

**Figure S43.** HMBC spectrum of walsunoid E (**5**) in  $\text{CDCl}_3$

**Figure S44.** (+)-ESIMS spectrum of walsunoid E (**5**)

**Figure S45.** (–)-ESIMS spectrum of walsunoid E (**5**)

**Figure S46.** (+)-HRESIMS spectrum of walsunoid E (**5**)

**Figure S47.** IR spectrum of walsunoid E (**5**)

**Figure S48.**  $^1\text{H}$  NMR spectrum of walsunoid F (**6**) in  $\text{C}_5\text{D}_5\text{N}$

**Figure S49.**  $^{13}\text{C}$  NMR spectrum of walsunoid F (**6**) in  $\text{C}_5\text{D}_5\text{N}$

**Figure S50.** HSQC spectrum of walsunoid F (**6**) in  $\text{C}_5\text{D}_5\text{N}$

**Figure S51.** HMBC spectrum of walsunoid d F (**6**) in  $\text{C}_5\text{D}_5\text{N}$

**Figure S52.** NOESY spectrum of walsunoid F (**6**) in  $\text{C}_5\text{D}_5\text{N}$

**Figure S53.** (+)-ESIMS spectrum of walsunoid F (**6**)

**Figure S54.** (–)-ESIMS spectrum of walsunoid F (**6**)

**Figure S55.** (–)-HRESIMS spectrum of walsunoid F (**6**)

**Figure S56.** IR spectrum of walsunoid F (**6**)

**Figure S57.**  $^1\text{H}$  NMR spectrum of walsunoid G (**7**) in  $\text{C}_5\text{D}_5\text{N}$

**Figure S58.**  $^{13}\text{C}$  NMR spectrum of walsunoid G (**7**) in  $\text{C}_5\text{D}_5\text{N}$

**Figure S59.** HSQC spectrum of walsunoid G (**7**) in  $\text{C}_5\text{D}_5\text{N}$

**Figure S60.** HMBC spectrum of walsunoid G (**7**) in  $\text{C}_5\text{D}_5\text{N}$

**Figure S61.** NOESY spectrum of walsunoid G (**7**) in  $\text{C}_5\text{D}_5\text{N}$

**Figure S62.** (+)-ESIMS spectrum of walsunoid G (**7**)

**Figure S63.** (–)-ESIMS spectrum of walsunoid G (**7**)

**Figure S64.** (–)-HRESIMS spectrum of walsunoid G (**7**)

**Figure S65.** IR spectrum of walsunoid G (**7**)

**Figure S66.**  $^1\text{H}$  NMR spectrum of walsunoid H (**8**) in  $\text{CDCl}_3$

**Figure S67.**  $^{13}\text{C}$  NMR spectrum of walsunoid H (**8**) in  $\text{CDCl}_3$

**Figure S68.** HSQC spectrum of walsunoid H (**8**) in  $\text{CDCl}_3$

**Figure S69.** HMBC spectrum of walsunoid H (**8**) in  $\text{CDCl}_3$

**Figure S70.** NOESY spectrum of walsunoid H (**8**) in  $\text{CDCl}_3$

**Figure S71.** (+)-ESIMS spectrum of walsunoid H (**8**)

**Figure S72.** (–)-ESIMS spectrum of walsunoid H (**8**)

**Figure S73.** (–)-HRESIMS spectrum of walsunoid H (**8**)

**Figure S74.** IR spectrum of walsunoid H (**8**)

**Figure S75.**  $^1\text{H}$  NMR spectrum of walsunoid I (**9**) in  $\text{CDCl}_3$

**Figure S76.**  $^{13}\text{C}$  NMR spectrum of walsunoid I (**9**) in  $\text{CDCl}_3$

**Figure S77.** HSQC spectrum of walsunoid I (**9**) in  $\text{CDCl}_3$

**Figure S78.** HMBC spectrum of walsunoid I (**9**) in  $\text{CDCl}_3$

**Figure S79.**  $^1\text{H}$ - $^1\text{H}$  COSY spectrum of walsunoid I (**9**) in  $\text{CDCl}_3$

**Figure S80.** NOESY spectrum of walsunoid I (**9**) in  $\text{CDCl}_3$

**Figure S81.** (+)-ESIMS spectrum of walsunoid I (**9**)

**Figure S82.** (–)-ESIMS spectrum of walsunoid I (**9**)

**Figure S83.** (–)-HRESIMS spectrum of walsunoid I (**9**)

**Figure S84.** IR spectrum of walsunoid I (**9**)

**Figure S85.**  $^1\text{H}$  NMR spectrum of compound **10** in  $\text{CDCl}_3$

**Figure S86.**  $^{13}\text{C}$  NMR spectrum of compound **10** in  $\text{CDCl}_3$

**Figure S87.**  $^1\text{H}$  NMR spectrum of compound **10** in  $\text{C}_5\text{D}_5\text{N}$

**Figure S88.**  $^{13}\text{C}$  NMR spectrum of compound **10** in  $\text{C}_5\text{D}_5\text{N}$

**Figure S89.** HSQC spectrum of compound **10** in  $\text{CDCl}_3$

**Figure S90.** HMBC spectrum of compound **10** in  $\text{CDCl}_3$

**Figure S91.** (–)-HRESIMS spectrum of **10**

**Figure S92.** LC-ESI( $\pm$ )MS analysis of **2**

**Figure S93.** LC-ESI( $\pm$ )MS analysis of **4**

**Figure S94.** LC-ESI( $\pm$ )MS analysis of **10**

**Figure S95.** LC-ESI( $\pm$ )MS analysis of ethanolic crude extract

**Table S1.**  $^1\text{H}$  and  $^{13}\text{C}$  NMR spectroscopic data of compounds **2** and **10** in  $\text{CDCl}_3$  at 500

MHz

| position    | <b>2</b>                       |                 | <b>10</b>                      |                 |
|-------------|--------------------------------|-----------------|--------------------------------|-----------------|
|             | $^1\text{H}$ ( <i>J</i> in Hz) | $^{13}\text{C}$ | $^1\text{H}$ ( <i>J</i> in Hz) | $^{13}\text{C}$ |
| 1           | 6.96, d (9.9)                  | 151.7           | 6.96, d (9.9)                  | 151.7           |
| 2           | 6.13, d (9.9)                  | 127.6           | 6.13, d (9.9)                  | 127.6           |
| 3           |                                | 203.5           |                                | 203.5           |
| 4           |                                | 48.7            |                                | 48.7            |
| 5           |                                | 135.0           |                                | 135.0           |
| 6           |                                | 140.8           |                                | 140.9           |
| 7           |                                | 197.4           |                                | 197.4           |
| 8           |                                | 45.9            |                                | 45.9            |
| 9           | 2.44, s                        | 45.4            | 2.45, s                        | 45.4            |
| 10          |                                | 41.0            |                                | 41.0            |
| 11          | 4.63, dd (8.8,6.3)             | 67.1            | 4.64, dd (8.5,6.4)             | 67.1            |
| 12 $\alpha$ | 2.11, dd (15.7,6.3)            | 46.8            | 2.10, dd (15.9,6.4)            | 46.6            |
| 12 $\beta$  | 2.41, d (15.7)                 |                 | 2.41, d (15.9)                 |                 |
| 13          |                                | 41.3            |                                | 41.2            |
| 14          |                                | 69.5            |                                | 69.6            |
| 15          | 3.98, s                        | 58.1            | 3.98, s                        | 58.0            |
| 16 $\alpha$ | 2.02, dd (13.5,10.9)           | 30.9            | 2.02, dd (13.5,11.0)           | 31.1            |
| 16 $\beta$  | 2.32, dd (13.5,6.5)            |                 | 2.30, dd (13.5,6.5)            |                 |
| 17          | 2.74, dd (10.9,6.5)            | 43.0            | 2.71, dd (11.0,6.5)            | 43.0            |
| 18          | 0.71, s                        | 22.3            | 0.74, s                        | 22.3            |
| 19          | 1.54, s                        | 25.7            | 1.54, s                        | 25.7            |
| 20          |                                | 137.7           |                                | 137.6           |
| 21          |                                | 170.8           |                                | 170.7           |
| 22          | 6.78, t (1.4)                  | 145.1           | 6.78, t (1.5)                  | 145.0           |
| 23          | 5.79, t (1.0)                  | 102.6           | 5.73, t (1.5)                  | 102.5           |
| 28          | 1.55, s                        | 27.0            | 1.55, s                        | 27.0            |
| 29          | 1.49, s                        | 21.3            | 1.49, s                        | 21.3            |
| 30          | 1.36, s                        | 22.8            | 1.36, s                        | 22.8            |
| 11-OH       | 2.38, d (8.8)                  |                 | 2.37, d (8.5)                  |                 |
| 6-OH        | 6.38, s                        |                 | 6.38, s                        |                 |
| OMe         | 3.56, s                        | 57.4            | 3.54, s                        | 57.2            |

**Table S2.** Preliminary assay results of tested compounds against human 11 $\beta$ -HSD1 at 10  $\mu$ M.

| Compds no.                                                                                                 | Expt. 1 | Expt. 1 | Expt. 1 | Average | SD    |
|------------------------------------------------------------------------------------------------------------|---------|---------|---------|---------|-------|
| <b>1</b>                                                                                                   | 33.45%  | 23.37%  | 39.50%  | 32.11%  | 8.15% |
| <b>2</b>                                                                                                   | 12.01%  | 11.26%  | 17.47%  | 13.58%  | 3.39% |
| <b>3</b>                                                                                                   | 8.64%   | 9.32%   | 15.29%  | 11.09%  | 3.66% |
| <b>4</b>                                                                                                   | 1.26%   | 2.46%   | 0.90%   | 1.53%   | 0.82% |
| <b>5</b>                                                                                                   | 11.50%  | 5.95%   | 15.86%  | 11.11%  | 4.96% |
| <b>6</b>                                                                                                   | 15.04%  | 12.23%  | 12.27%  | 13.18%  | 1.61% |
| <b>7</b>                                                                                                   | 21.89%  | 10.87%  | 17.64%  | 16.80%  | 5.55% |
| <b>8</b>                                                                                                   | 56.59%  | 63.21%  | 58.83%  | 59.54%  | 3.36% |
| <b>9</b>                                                                                                   | 1.35%   | 4.47%   | 13.08%  | 6.30%   | 6.08% |
| <b>10</b>                                                                                                  | 14.25%  | 6.86%   | 13.69%  | 11.60%  | 4.12% |
| <b>11</b>                                                                                                  | 49.28%  | 47.47%  | 45.23%  | 47.33%  | 2.03% |
| <b>12</b>                                                                                                  | 50.05%  | 42.55%  | 43.59%  | 45.40%  | 4.06% |
| <b>13</b>                                                                                                  | 42.47%  | 48.50%  | 42.37%  | 47.78%  | 5.08% |
| <b>14</b>                                                                                                  | 72.33%  | 69.29%  | 77.83%  | 73.17%  | 4.32% |
| <b>16</b>                                                                                                  | 12.54%  | 9.71%   | 13.66%  | 11.97%  | 2.03% |
| <b>17</b>                                                                                                  | 35.20%  | 43.10%  | 32.58%  | 36.96%  | 5.48% |
| <b>18</b>                                                                                                  | 15.38%  | 23.04%  | 24.20%  | 20.87%  | 4.79% |
| <b>19</b>                                                                                                  | 30.32%  | 47.17%  | 38.47%  | 38.65%  | 8.43% |
| <b>20</b>                                                                                                  | 37.65%  | 35.28%  | 46.48%  | 39.80%  | 5.90% |
| Glycyrrhetic acid 1 nM                                                                                     | 15.45%  | 11.05%  | 8.86%   | 11.79%  | 3.36% |
| Glycyrrhetic acid 10 nM                                                                                    | 56.78%  | 51.97%  | 59.55%  | 56.10%  | 3.87% |
| Glycyrrhetic acid 100 nM                                                                                   | 94.66%  | 88.87%  | 89.99%  | 91.17%  | 3.07% |
| Activity of <b>15</b> was already reported in our previous article. ( <i>J. Nat. Prod.</i> 2013, 76, 1319) |         |         |         |         |       |

**Table S3.** Preliminary assay results of tested compounds against mouse 11 $\beta$ -HSD1 at 10  $\mu$ M.

| Compds no.                                                                                                 | Expt. 1 | Expt. 1 | Expt. 1 | Average | SD    |
|------------------------------------------------------------------------------------------------------------|---------|---------|---------|---------|-------|
| <b>1</b>                                                                                                   | 14.10%  | 27.18%  | 27.40%  | 22.89%  | 7.62% |
| <b>2</b>                                                                                                   | 39.05%  | 38.18%  | 31.10%  | 36.11%  | 4.36% |
| <b>3</b>                                                                                                   | 8.53%   | 7.23%   | 2.65%   | 6.14%   | 3.09% |
| <b>4</b>                                                                                                   | 15.38%  | 22.07%  | 19.60%  | 19.01%  | 3.38% |
| <b>5</b>                                                                                                   | 15.16%  | 4.22%   | 7.78%   | 9.06%   | 5.58% |
| <b>6</b>                                                                                                   | 16.80%  | 15.47%  | 28.08%  | 20.12%  | 6.93% |
| <b>7</b>                                                                                                   | 17.65%  | 14.99%  | 14.70%  | 15.78%  | 1.63% |
| <b>8</b>                                                                                                   | 6.88%   | 5.90%   | 7.03%   | 6.60%   | 0.61% |
| <b>9</b>                                                                                                   | 30.60%  | 30.93%  | 21.95%  | 27.83%  | 5.09% |
| <b>10</b>                                                                                                  | 7.88%   | 5.17%   | 7.72%   | 6.93%   | 1.52% |
| <b>11</b>                                                                                                  | 84.54%  | 89.58%  | 84.73%  | 86.28%  | 2.85% |
| <b>12</b>                                                                                                  | 77.43%  | 73.01%  | 69.82%  | 73.42%  | 3.82% |
| <b>13</b>                                                                                                  | 84.31%  | 88.76%  | 85.61%  | 86.23%  | 2.29% |
| <b>14</b>                                                                                                  | 96.00%  | 95.62%  | 87.11%  | 92.91%  | 5.02% |
| <b>16</b>                                                                                                  | -2.61%  | 4.51%   | 5.68%   | 2.53    | 4.49% |
| <b>17</b>                                                                                                  | 19.22%  | 11.70%  | 14.92%  | 15.28%  | 3.78% |
| <b>18</b>                                                                                                  | 15.08%  | 20.42%  | 23.76%  | 19.75%  | 4.37% |
| <b>19</b>                                                                                                  | 50.38%  | 52.89%  | 44.80%  | 49.35%  | 4.14% |
| <b>20</b>                                                                                                  | 25.99%  | 22.95%  | 19.15%  | 22.69%  | 3.43% |
| Glycyrrhetic acid 1 nM                                                                                     | 12.58%  | 11.04%  | 12.13%  | 11.91%  | 0.79% |
| Glycyrrhetic acid 10 nM                                                                                    | 58.83%  | 59.77%  | 66.01%  | 61.53%  | 3.90% |
| Glycyrrhetic acid 100 nM                                                                                   | 93.51%  | 105.80% | 99.43%  | 99.58%  | 6.15% |
| Activity of <b>15</b> was already reported in our previous article. ( <i>J. Nat. Prod.</i> 2013, 76, 1319) |         |         |         |         |       |



**Table S4.** X-ray crystallographic data for walsunoid D (**4**)<sup>a</sup>

|                                   |                                                                                                                                                                           |
|-----------------------------------|---------------------------------------------------------------------------------------------------------------------------------------------------------------------------|
| Empirical formula                 | C <sub>27</sub> H <sub>34</sub> O <sub>8</sub>                                                                                                                            |
| Formula weight                    | 486.54                                                                                                                                                                    |
| Temperature                       | 296.15 K                                                                                                                                                                  |
| Wavelength                        | 1.54178 Å                                                                                                                                                                 |
| Crystal system                    | Monoclinic                                                                                                                                                                |
| Space group                       | P 1 21 1                                                                                                                                                                  |
| Unit cell dimensions              | $a = 7.4553 (2) \text{ Å}, \quad \alpha = 90^\circ$<br>$b = 12.0869 (4) \text{ Å}, \quad \beta = 90.180(2)^\circ$<br>$c = 28.1295 (7) \text{ Å}, \quad \gamma = 90^\circ$ |
| Volume                            | 2534.78 (13) Å <sup>3</sup>                                                                                                                                               |
| Z                                 | 4                                                                                                                                                                         |
| Calculated density                | 1.275 Mg/m <sup>3</sup>                                                                                                                                                   |
| Absorption coefficient            | 0.770 mm <sup>-1</sup>                                                                                                                                                    |
| F(000)                            | 1040                                                                                                                                                                      |
| Crystal size                      | 0.15 * 0.05 * 0.03 mm <sup>3</sup>                                                                                                                                        |
| Theta range for data collection   | 3.142 to 69.998 °                                                                                                                                                         |
| Index ranges                      | -8 ≤ h ≤ 6, -12 ≤ k ≤ 14, -32 ≤ l ≤ 33                                                                                                                                    |
| Reflections collected             | 15958                                                                                                                                                                     |
| Independent reflections           | 6961 [R(int) = 0.0486]                                                                                                                                                    |
| Completeness to theta = 67.679 °  | 88.5 %                                                                                                                                                                    |
| Absorption correction             | Semi-empirical from equivalents                                                                                                                                           |
| Max. and min. transmission        | 0.7533 and 0.5340                                                                                                                                                         |
| Refinement method                 | Full-matrix least-squares on F <sup>2</sup>                                                                                                                               |
| Data / restraints / parameters    | 6961 / 1 / 647                                                                                                                                                            |
| Goodness-of-fit on F <sup>2</sup> | 1.025                                                                                                                                                                     |
| Final R indices [I > 2σ(I)]       | R1 = 0.0432, wR2 = 0.1106                                                                                                                                                 |
| R indices (all data)              | R1 = 0.0477, wR2 = 0.1147                                                                                                                                                 |
| Absolute structure parameter      | -0.04(9)                                                                                                                                                                  |
| Largest diff. peak and hole       | 0.169 and -0.228 e. Å <sup>-3</sup>                                                                                                                                       |

<sup>a</sup> Colorless crystals of walsunoid D (**4**) were obtained in methanol solvent.

**Table S5.** X-ray crystallographic data for compound **10**<sup>a</sup>

|                                   |                                                                                                                                                                      |
|-----------------------------------|----------------------------------------------------------------------------------------------------------------------------------------------------------------------|
| Empirical formula                 | C <sub>27</sub> H <sub>32</sub> O <sub>8</sub>                                                                                                                       |
| Formula weight                    | 484.52                                                                                                                                                               |
| Temperature                       | 140 (2) K                                                                                                                                                            |
| Wavelength                        | 1.54178 Å                                                                                                                                                            |
| Crystal system                    | Monoclinic                                                                                                                                                           |
| Space group                       | P 21                                                                                                                                                                 |
| Unit cell dimensions              | $a = 7.50130 (10) \text{ Å}, \quad \alpha = 90^\circ$<br>$b = 11.6919 (2) \text{ Å}, \quad \beta = 90^\circ$<br>$c = 14.6190 (2) \text{ Å}, \quad \gamma = 90^\circ$ |
| Volume                            | 1244.70 (3) Å <sup>3</sup>                                                                                                                                           |
| Z                                 | 2                                                                                                                                                                    |
| Calculated density                | 1.293 Mg/m <sup>3</sup>                                                                                                                                              |
| Absorption coefficient            | 0.784 mm <sup>-1</sup>                                                                                                                                               |
| F(000)                            | 516                                                                                                                                                                  |
| Crystal size                      | 0.250 * 0.120 * 0.100 mm <sup>3</sup>                                                                                                                                |
| Theta range for data collection   | 3.114 to 69.460 °                                                                                                                                                    |
| Index ranges                      | -7 ≤ h ≤ 8, -14 ≤ k ≤ 14, -17 ≤ l ≤ 17                                                                                                                               |
| Reflections collected             | 9728                                                                                                                                                                 |
| Independent reflections           | 4294 [R(int) = 0.0486]                                                                                                                                               |
| Completeness to theta = 67.679 °  | 98.9 %                                                                                                                                                               |
| Absorption correction             | Semi-empirical from equivalents                                                                                                                                      |
| Max. and min. transmission        | 0.7532 and 0.4701                                                                                                                                                    |
| Refinement method                 | Full-matrix least-squares on F <sup>2</sup>                                                                                                                          |
| Data / restraints / parameters    | 4294 / 1 / 324                                                                                                                                                       |
| Goodness-of-fit on F <sup>2</sup> | 1.062                                                                                                                                                                |
| Final R indices [I > 2σ(I)]       | R1 = 0.0423, wR2 = 0.1051                                                                                                                                            |
| R indices (all data)              | R1 = 0.0424, wR2 = 0.1053                                                                                                                                            |
| Absolute structure parameter      | -0.01(7)                                                                                                                                                             |
| Largest diff. peak and hole       | 0.284 and -0.254 e. Å <sup>-3</sup>                                                                                                                                  |

<sup>a</sup> Colorless crystals of **10** were obtained in methanol solvent.

**Figure S1.**  $^1\text{H}$  NMR spectrum of walsunoid A (**1**) in  $\text{CDCl}_3$

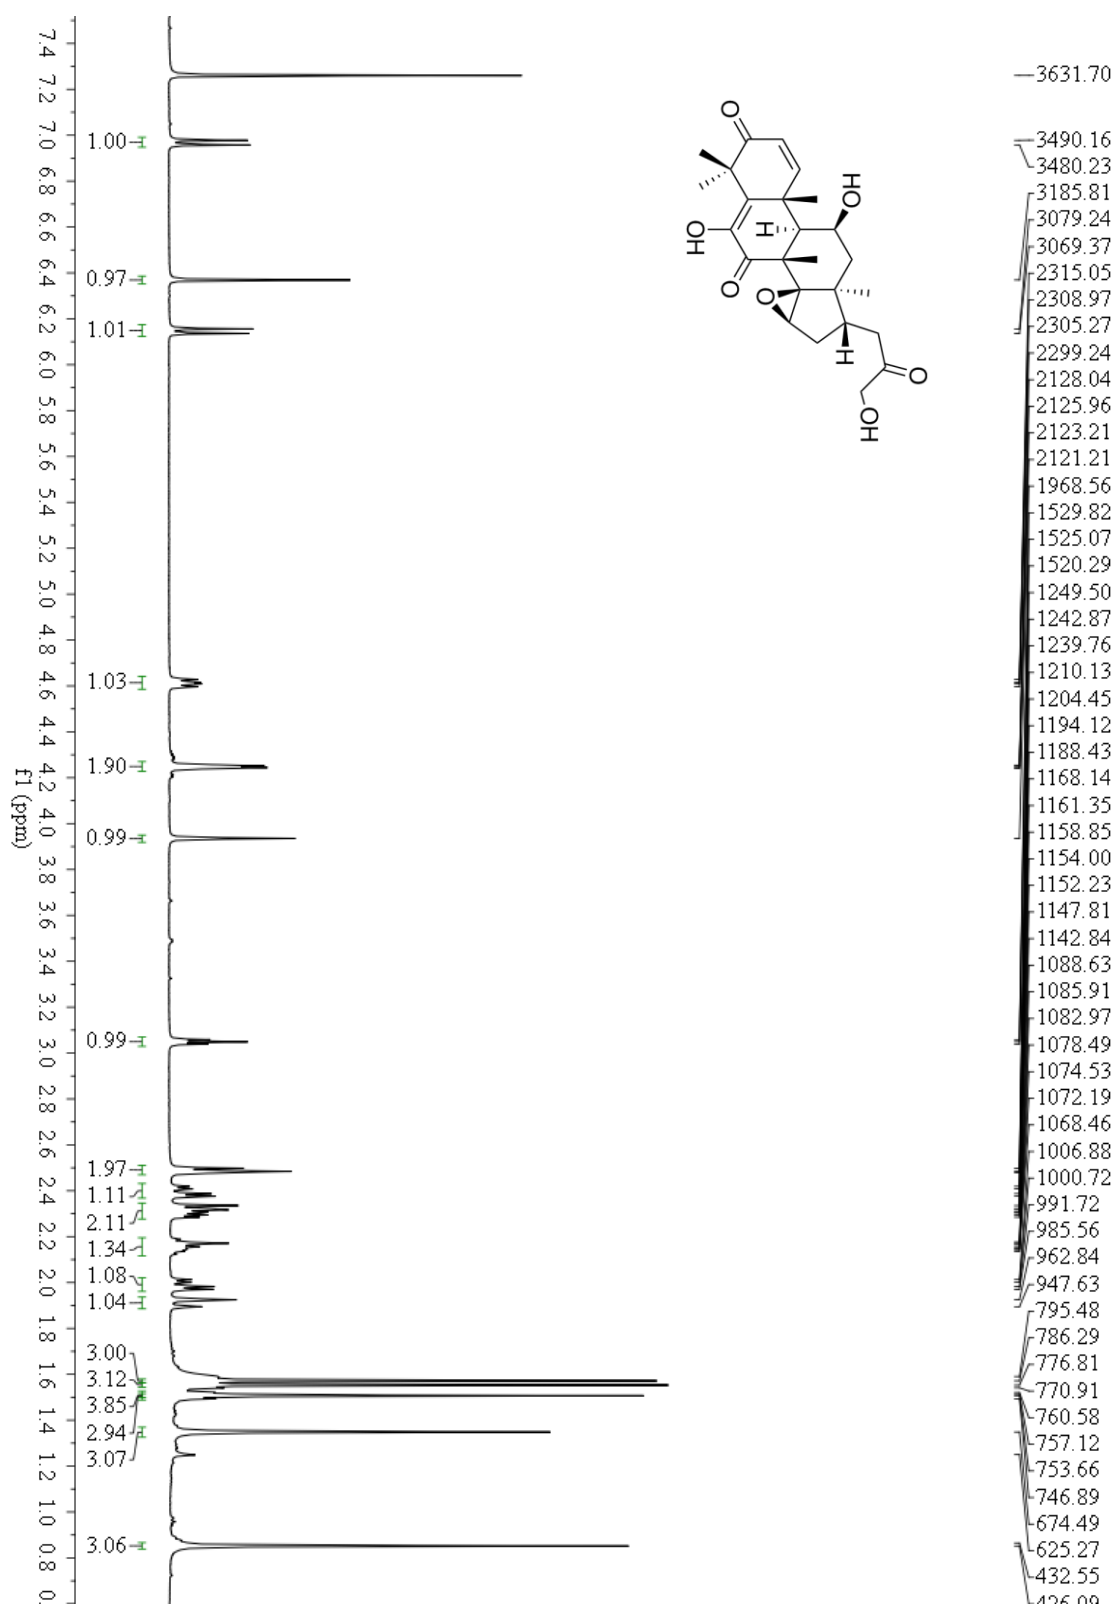

**Figure S2.**  $^{13}\text{C}$  NMR spectrum of walsunoid A (**1**) in  $\text{CDCl}_3$

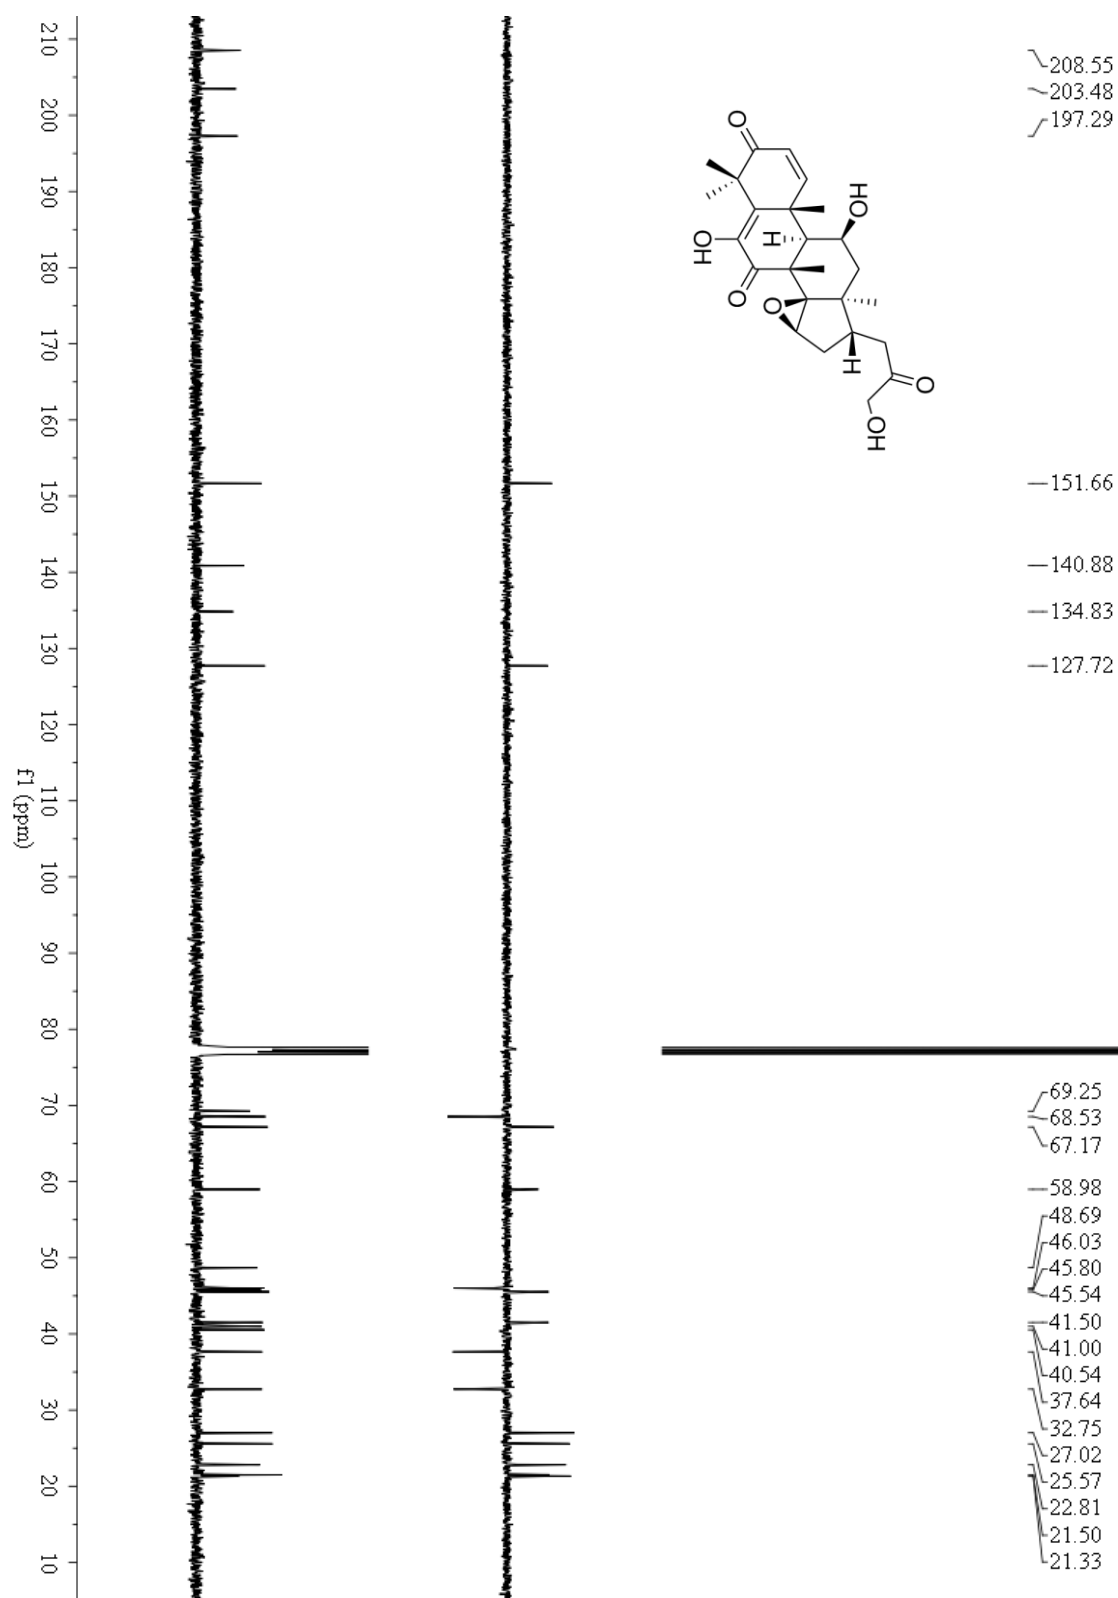

**Figure S3.** HSQC spectrum of walsunoid A (**1**) in CDCl<sub>3</sub>

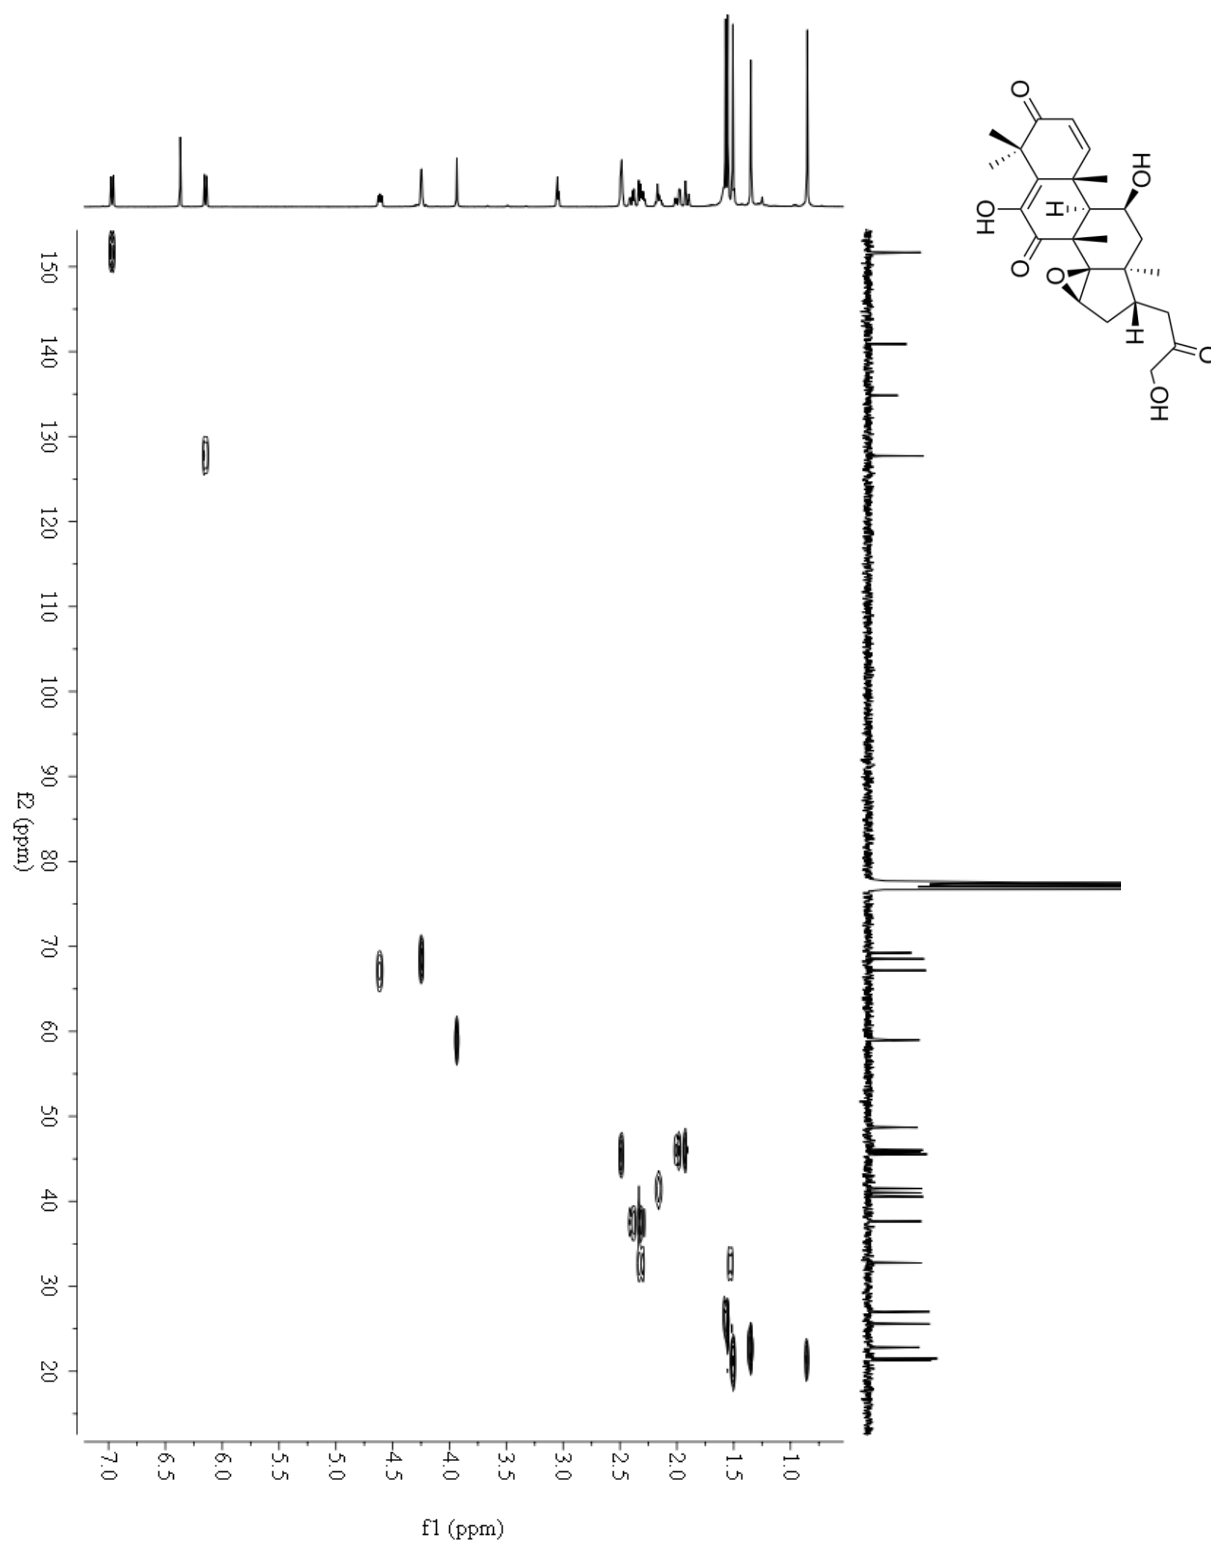

**Figure S4.** HMBC spectrum of walsunoid A (**1**) in CDCl<sub>3</sub>

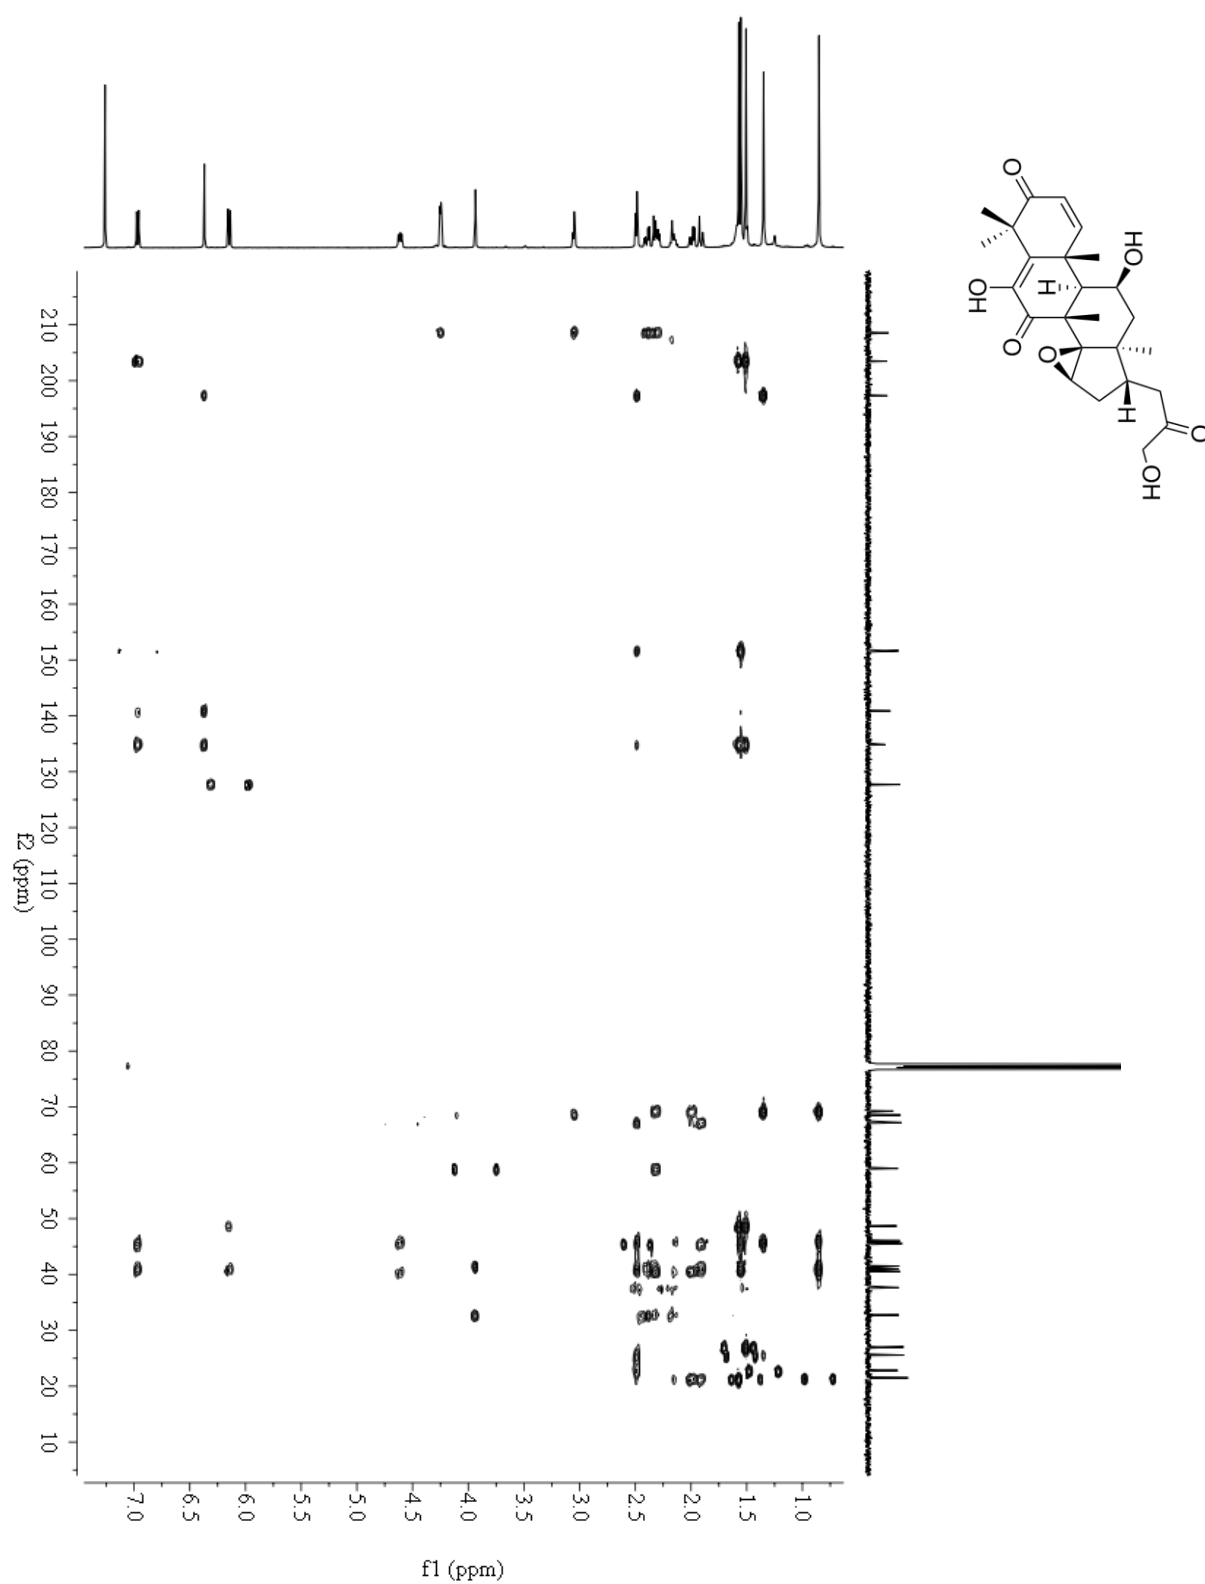

**Figure S5.**  $^1\text{H}$ - $^1\text{H}$  COSY spectrum of walsunoid A (**1**) in  $\text{CDCl}_3$

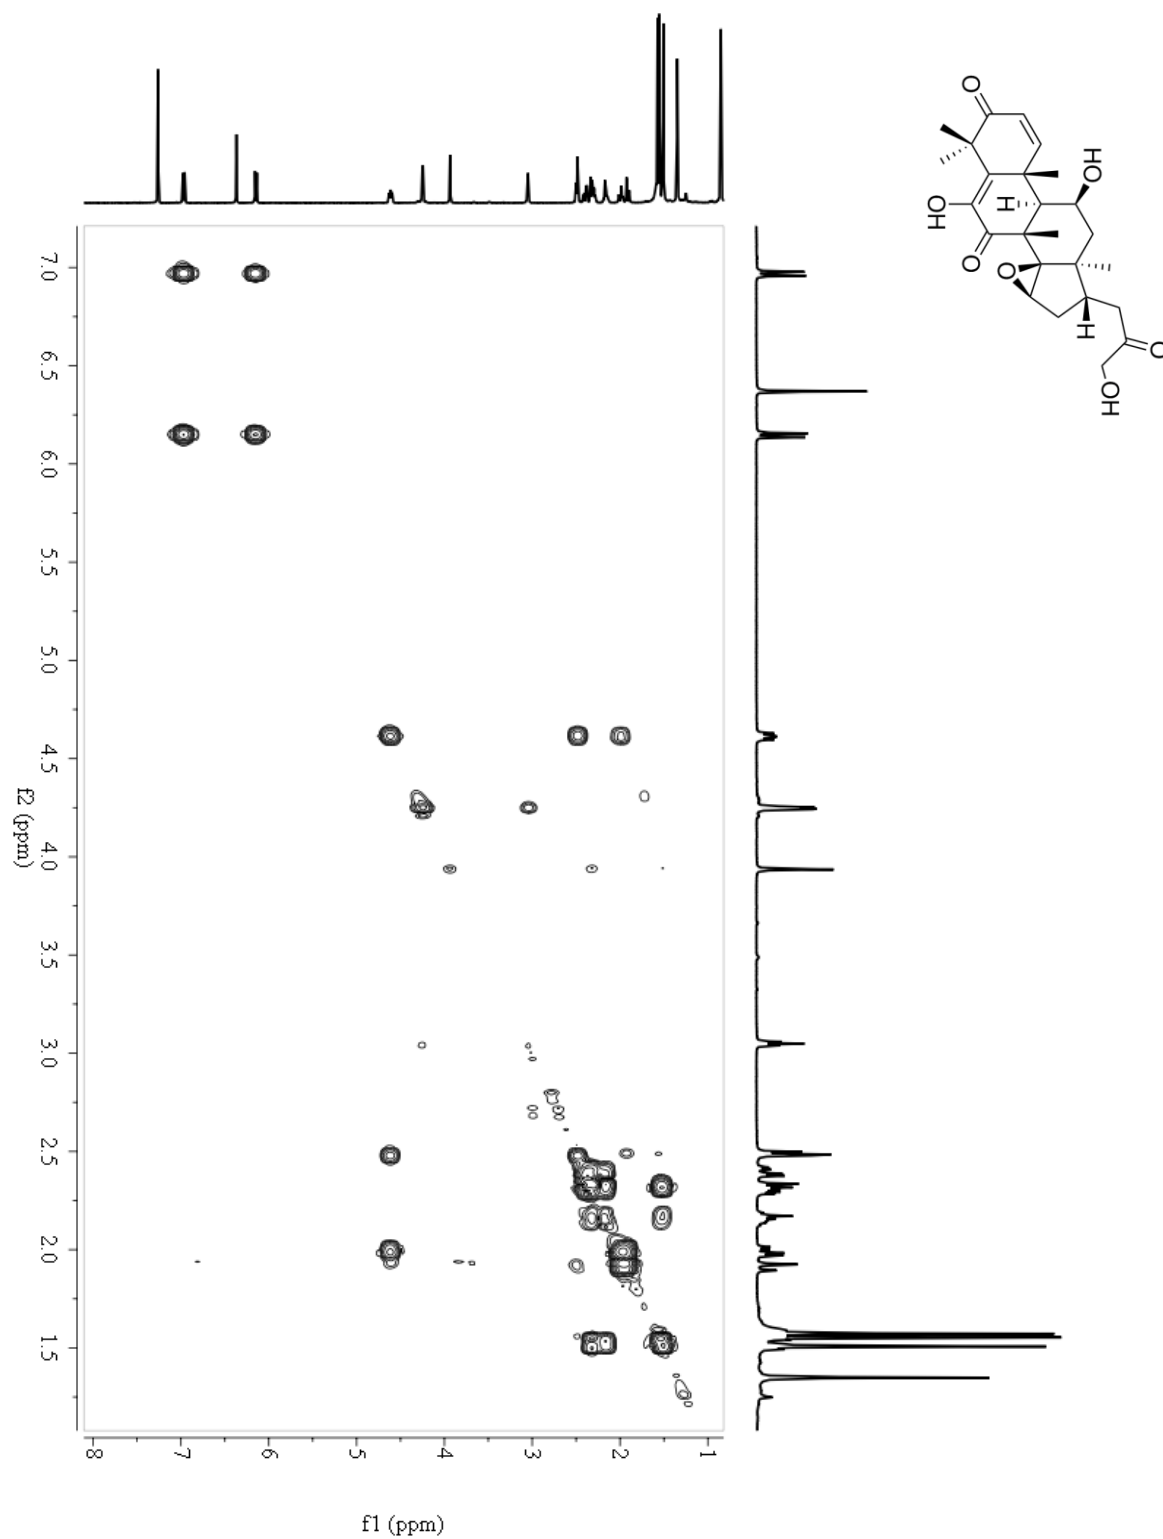

**Figure S6.** ROESY spectrum of walsunoid A (**1**) in CDCl<sub>3</sub>

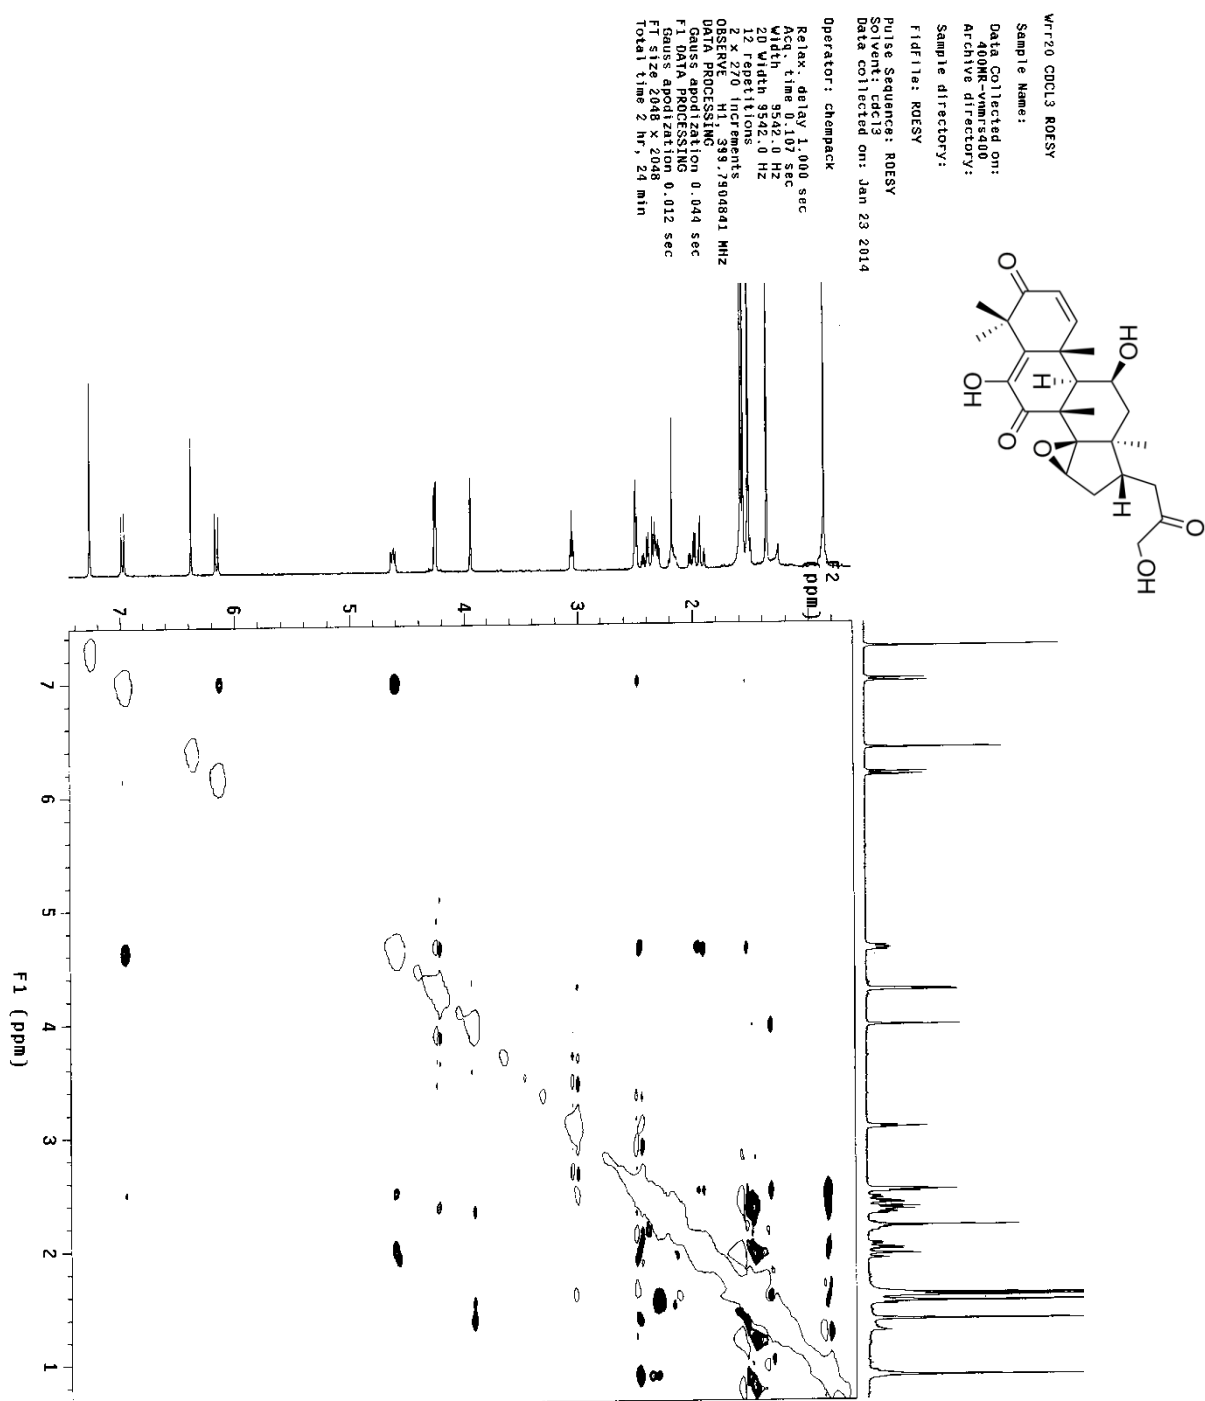



Figure S7. ESI(+)MS spectrum of walsunoid A (1)

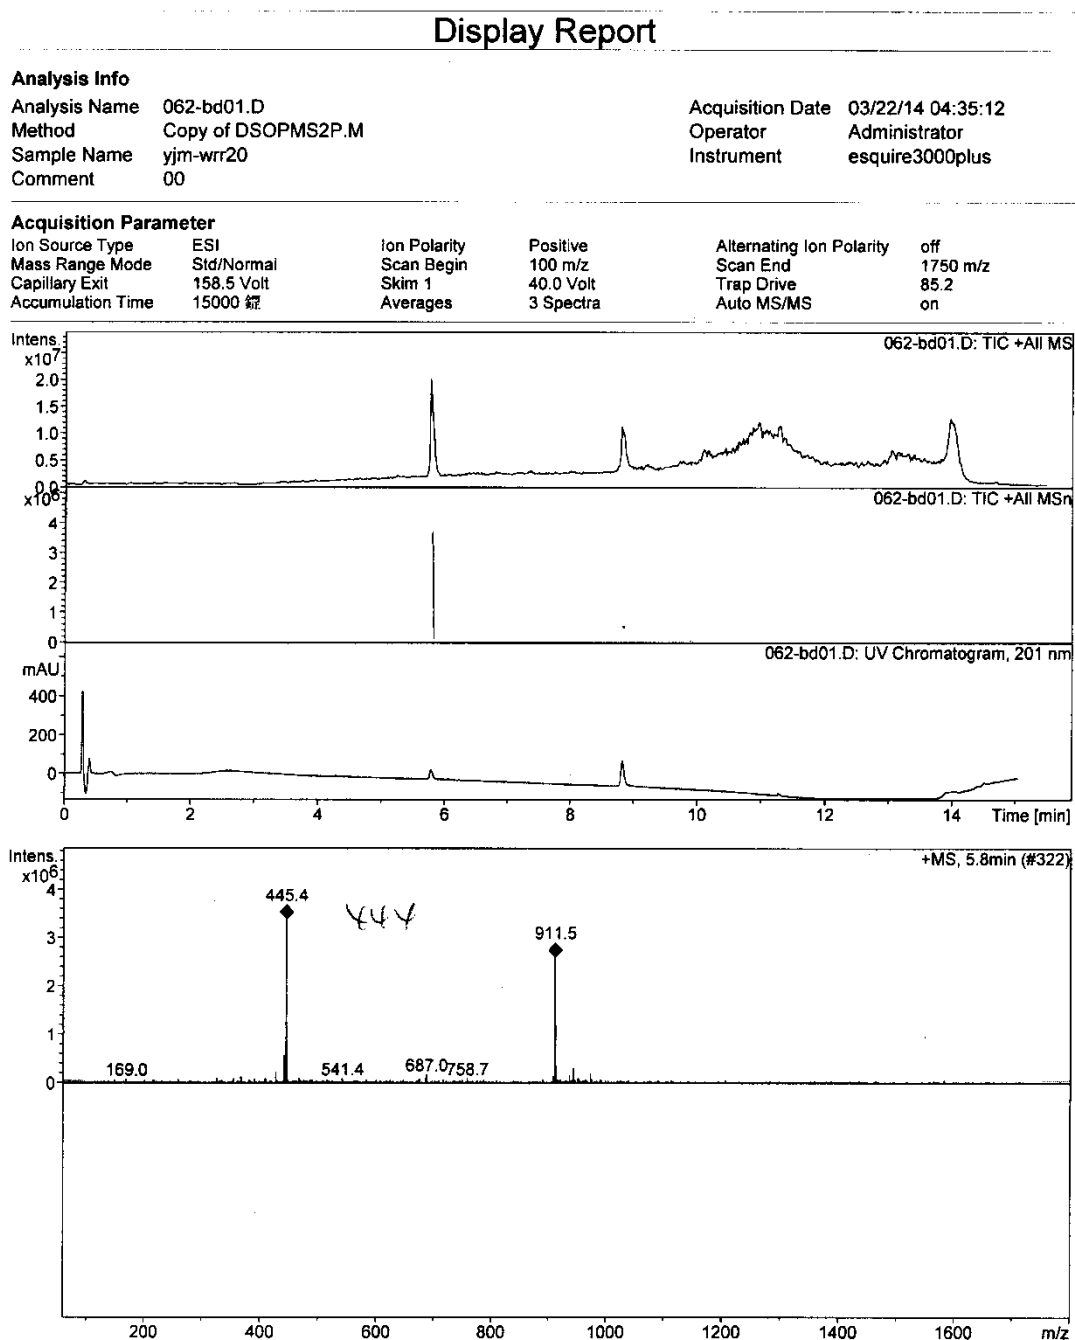

**Figure S8. (-)-ESIMS spectrum of walsunoid A (1)**

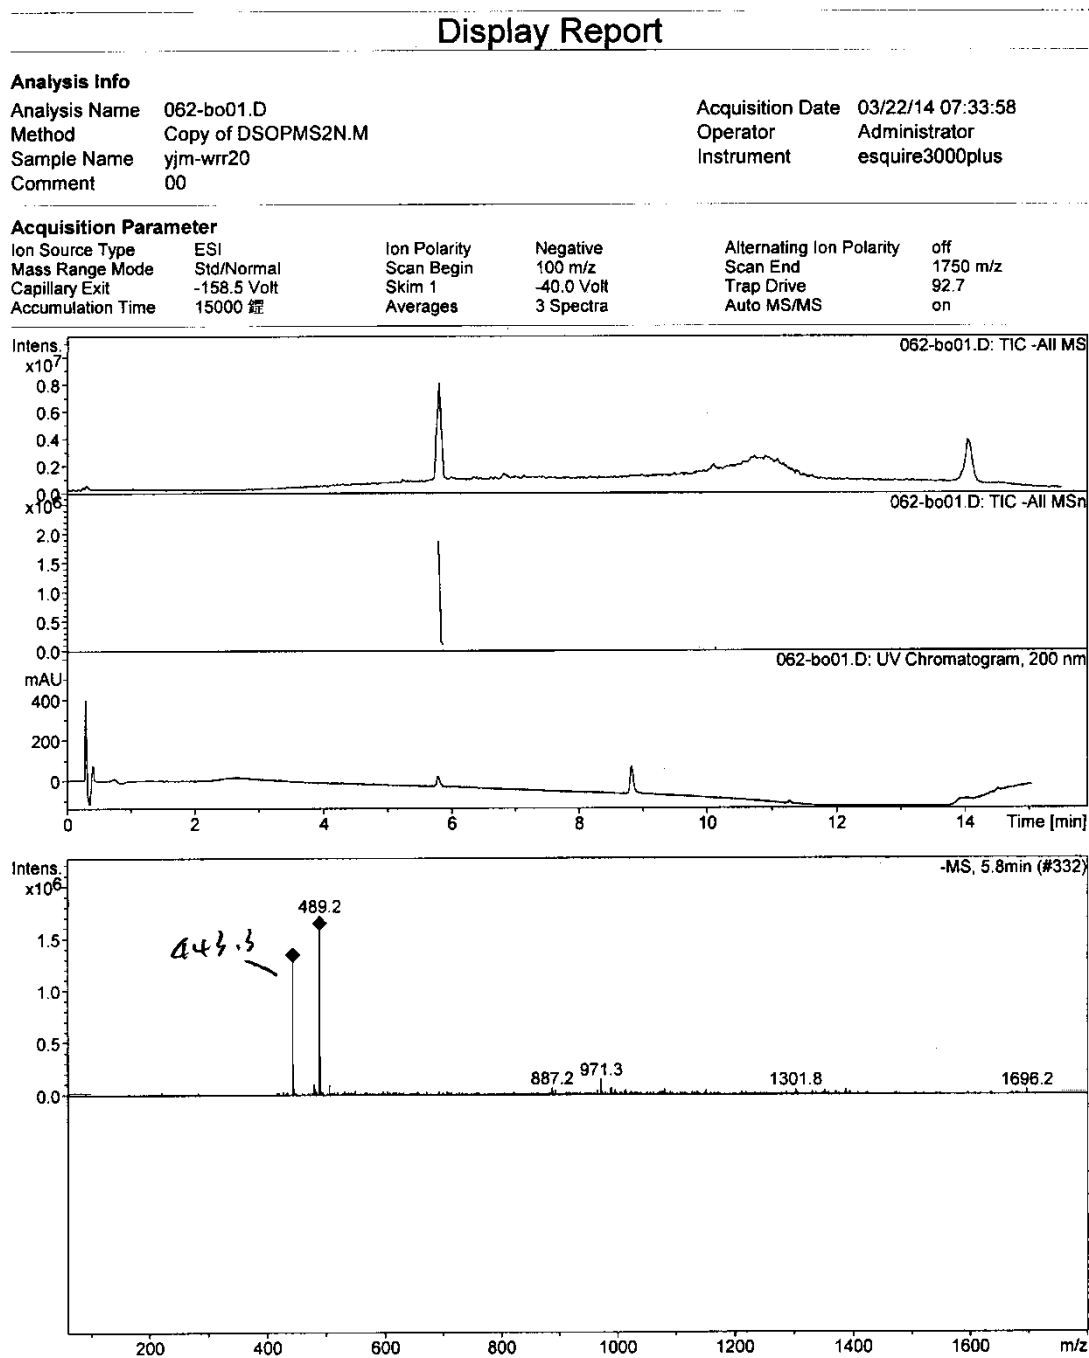

**Figure S9. (-)-HRESIMS spectrum of walsunoid A (1)**

**Elemental Composition Report**

**Page 1**

**Single Mass Analysis**

Tolerance = 5.0 PPM / DBE: min = -1.5, max = 50.0

Element prediction: Off

Number of isotope peaks used for i-FIT = 3

Monoisotopic Mass, Even Electron Ions

252 formula(e) evaluated with 1 results within limits (up to 50 closest results for each mass)

Elements Used:

C: 5-80 H: 2-120 N: 0-2 O: 0-20

wrr20

LCT PXE KE324

03-Apr-2014

15:09:11

1: TOF MS ES-

1.21e+004

wrr20\_0403 18 (0.372) AM2 (Ar,10000.0,0.00,1.00); ABS; Cm (7:25)

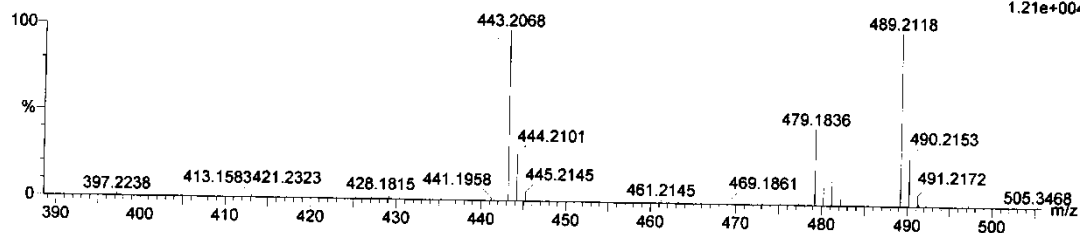

Minimum:

Maximum:

5.0 5.0 -1.5  
50.0

| Mass     | Calc. Mass | mDa  | PPM  | DBE  | i-FIT | i-FIT (Norm) | Formula    |
|----------|------------|------|------|------|-------|--------------|------------|
| 443.2068 | 443.2070   | -0.2 | -0.5 | 10.5 | 132.8 | 0.0          | C25 H31 O7 |

**Figure S10.** IR spectrum of walsunoid A (**1**)

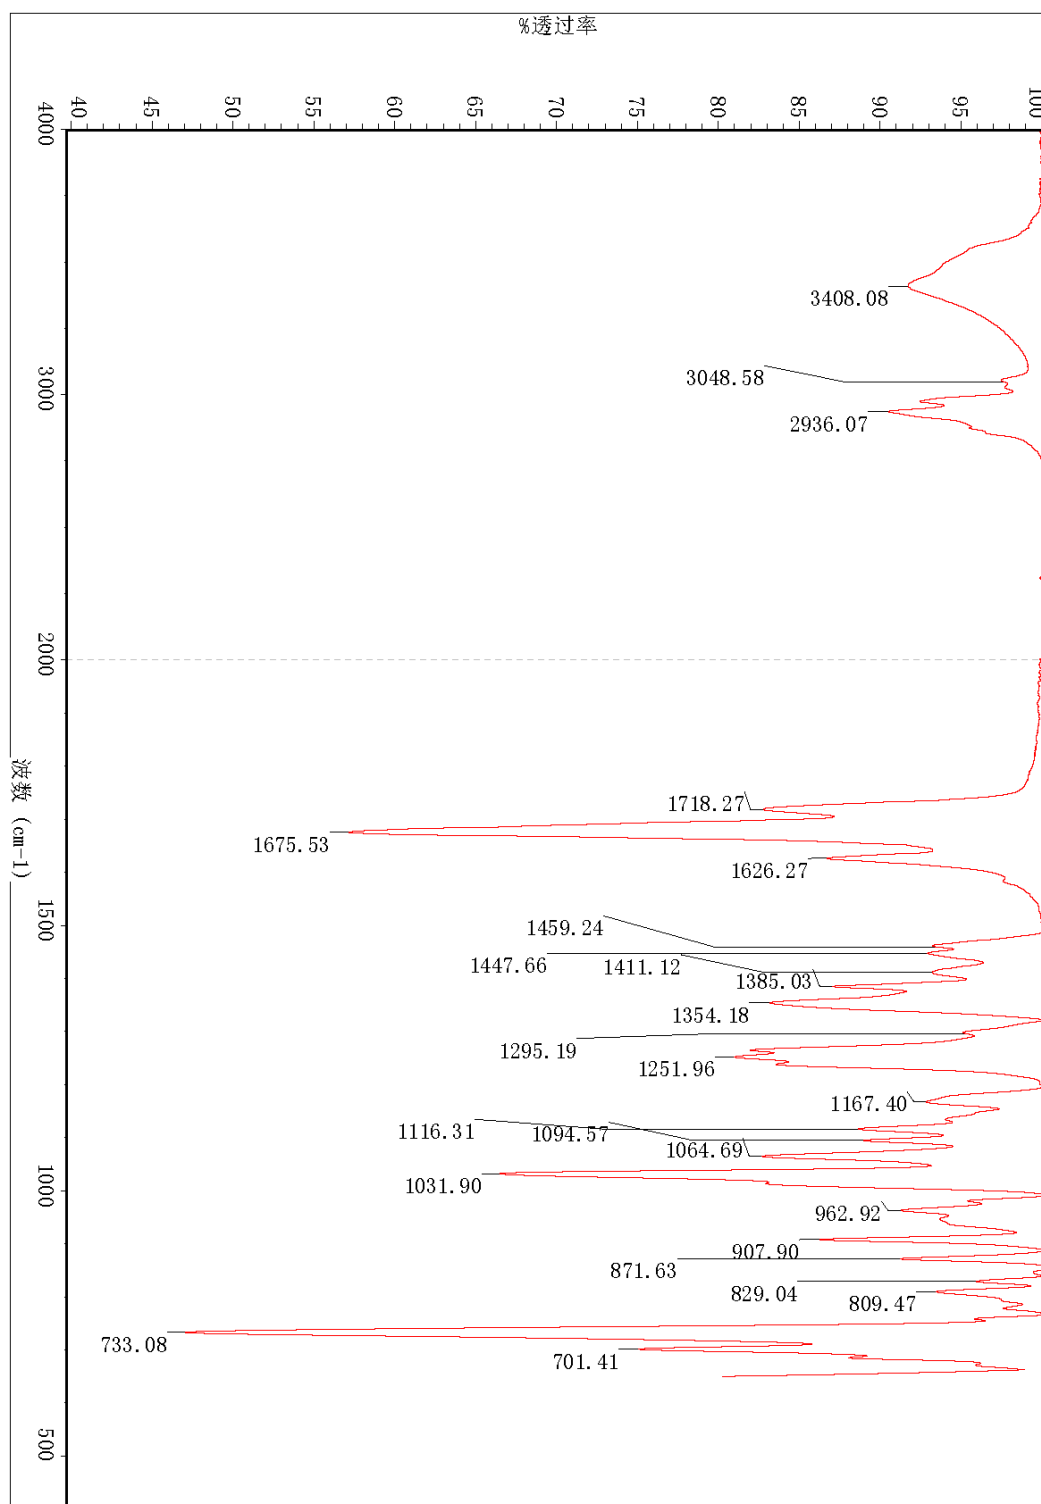

**Figure S11.**  $^1\text{H}$  NMR spectrum of walsunoid B (**2**) in  $\text{CDCl}_3$

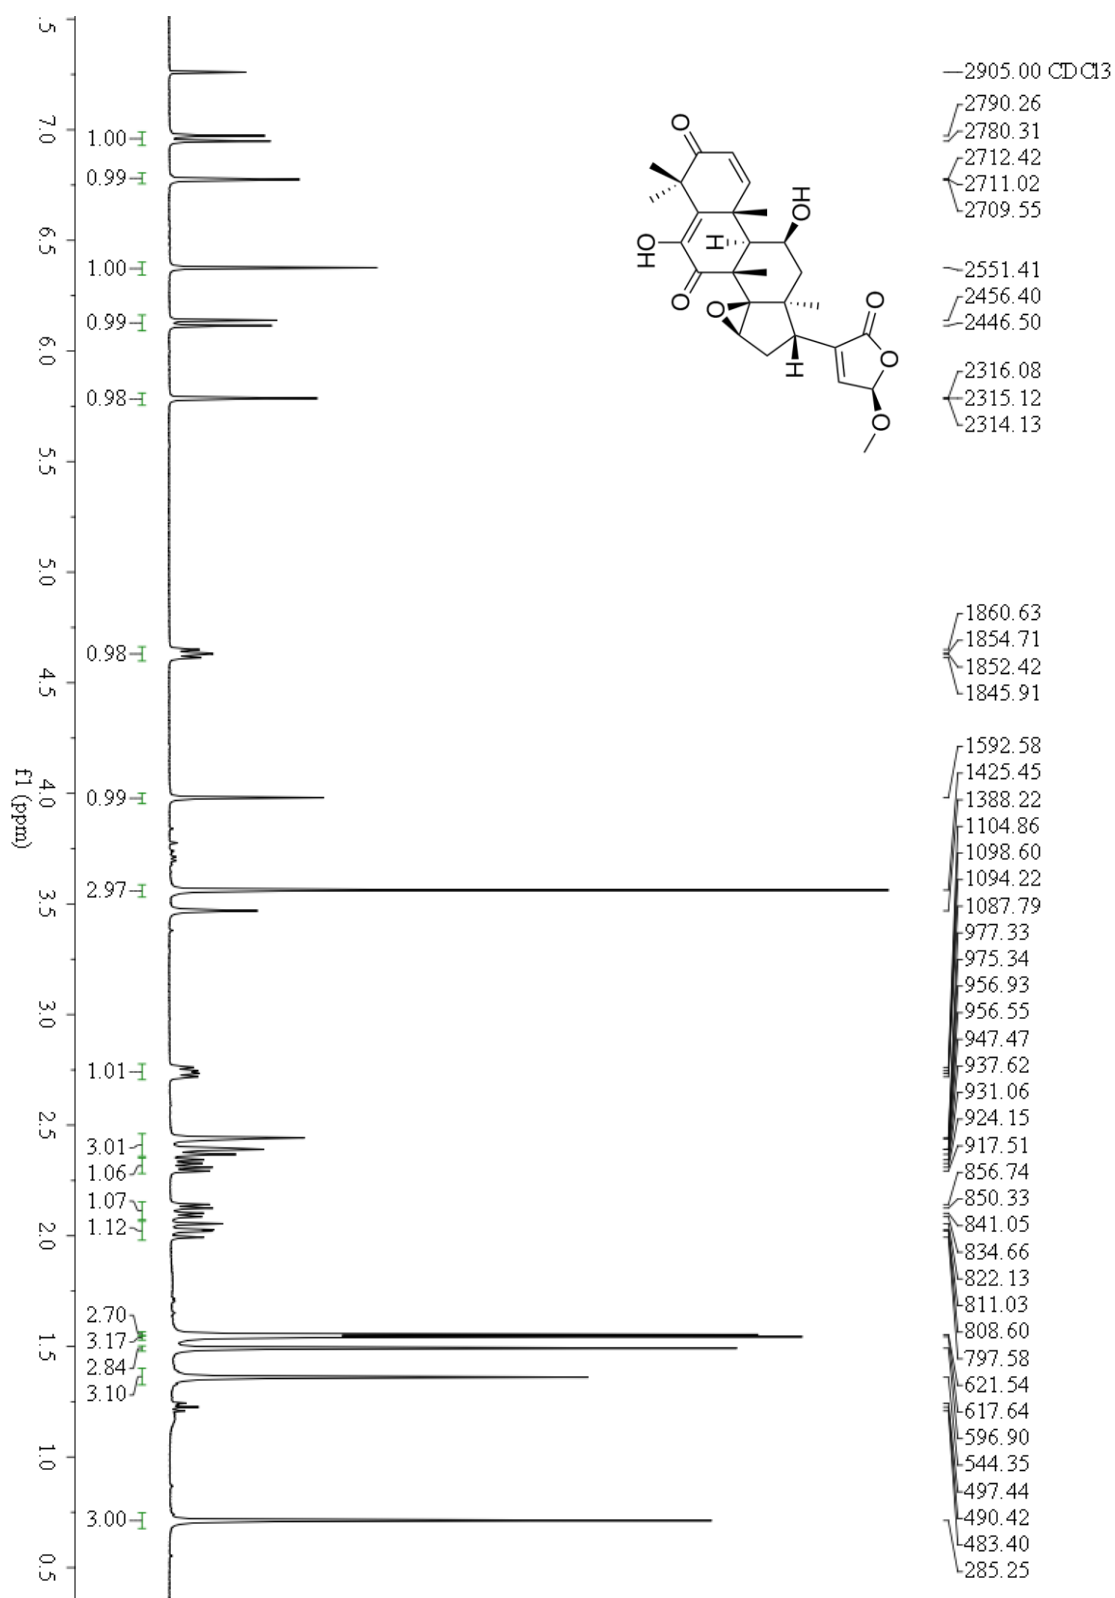

**Figure S12.**  $^{13}\text{C}$  NMR spectrum of walsunoid B (**2**) in  $\text{CDCl}_3$

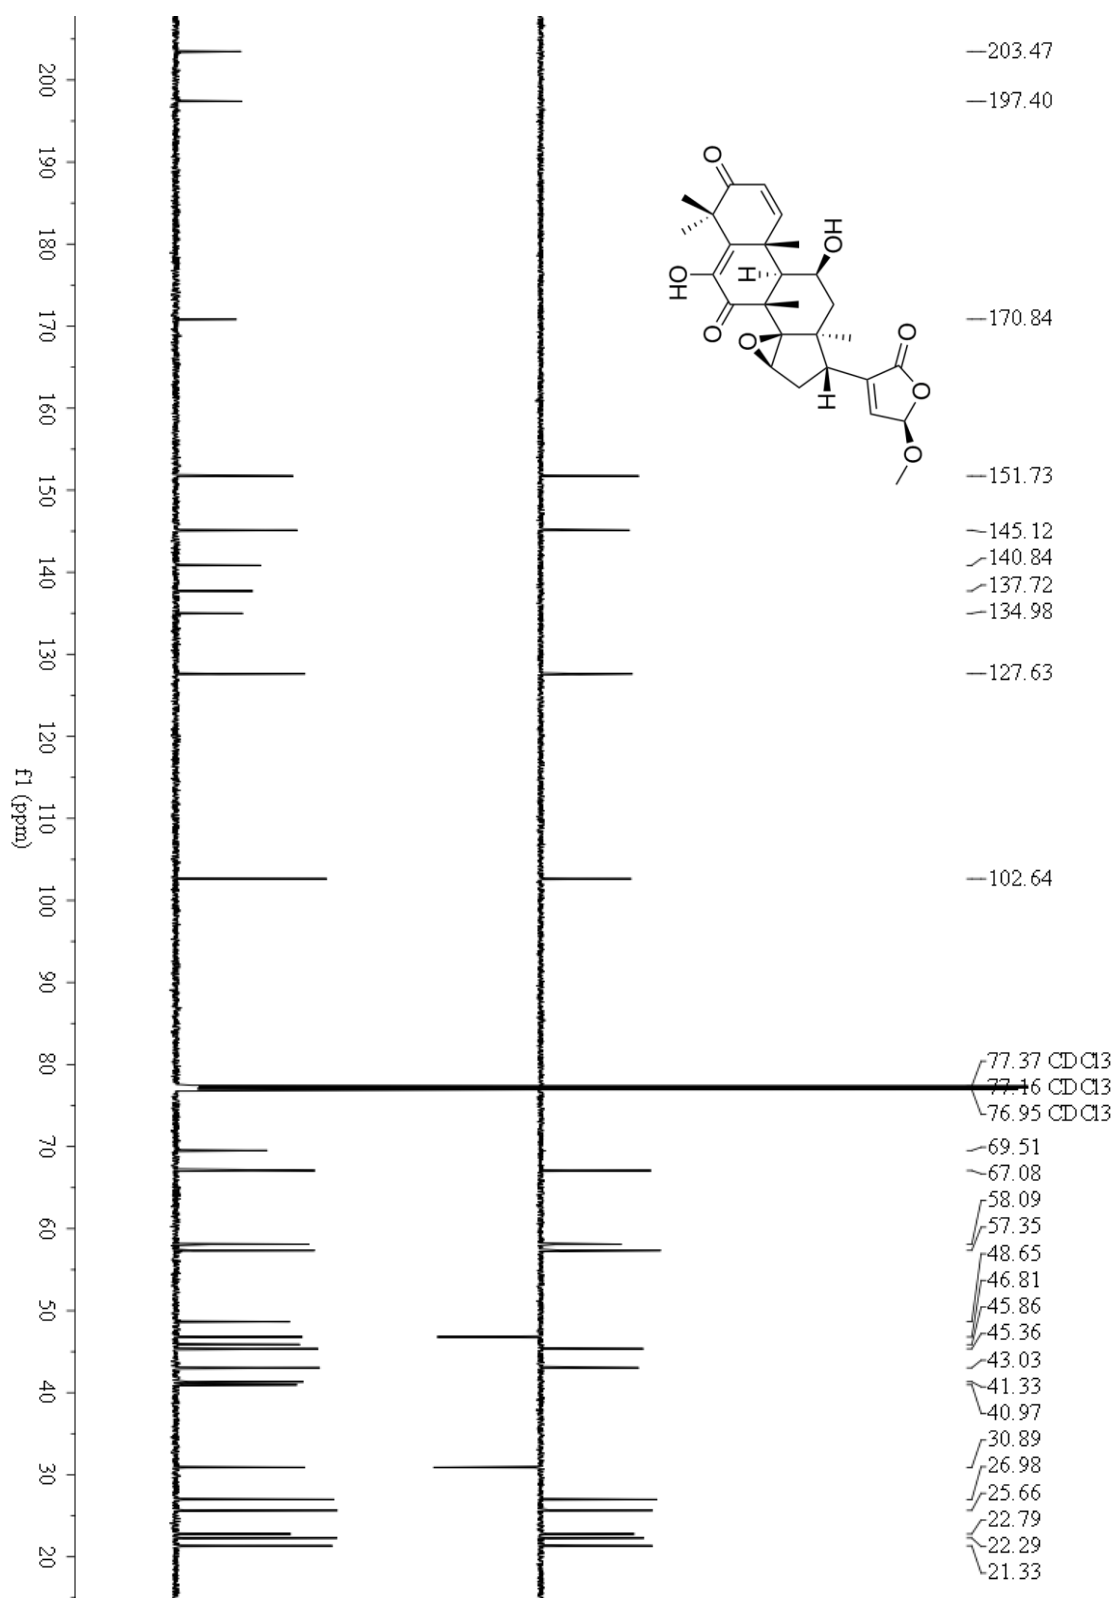

Chemical structure of **1** is shown. The <sup>1</sup>H NMR spectrum (CDCl<sub>3</sub>) of **1** is displayed, with the chemical shift (ppm) and integration values for each peak listed on the right and left sides, respectively.

**Figure S14.**  $^{13}\text{C}$  NMR spectrum of walsunoid B (**2**) in  $\text{C}_5\text{D}_5\text{N}$

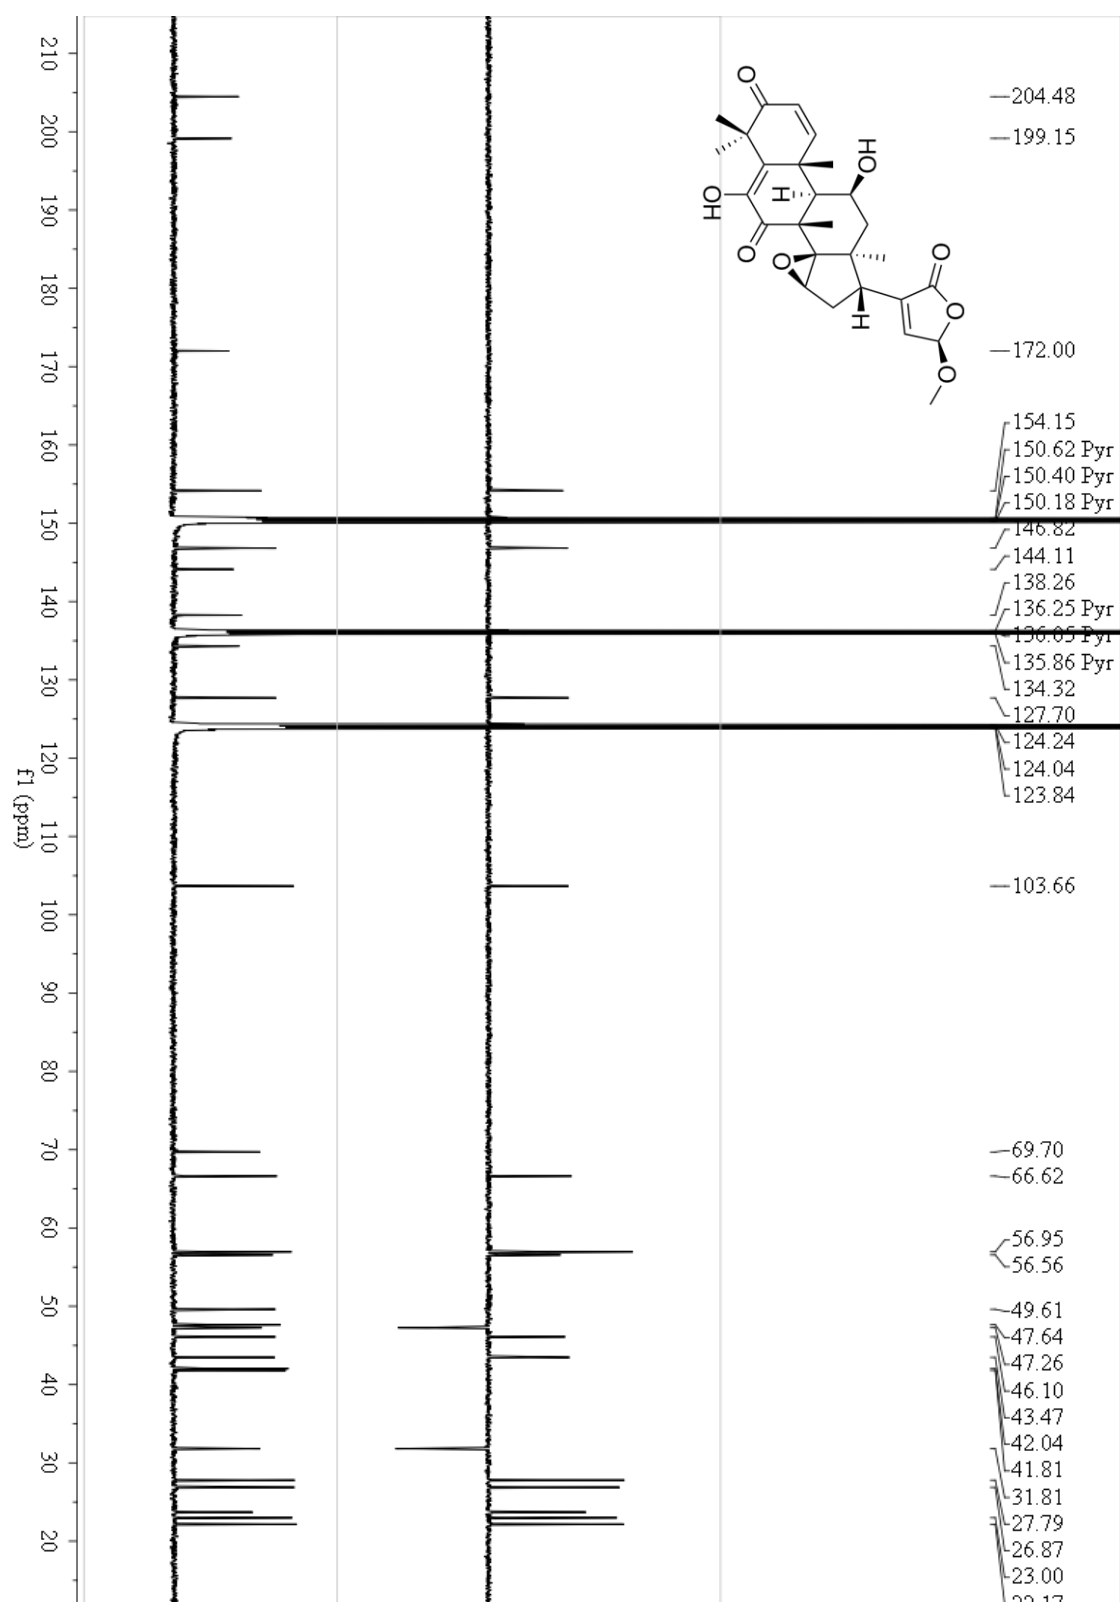



**Figure S15.** HSQC spectrum of walsunoid B (**2**) in C<sub>5</sub>D<sub>5</sub>N

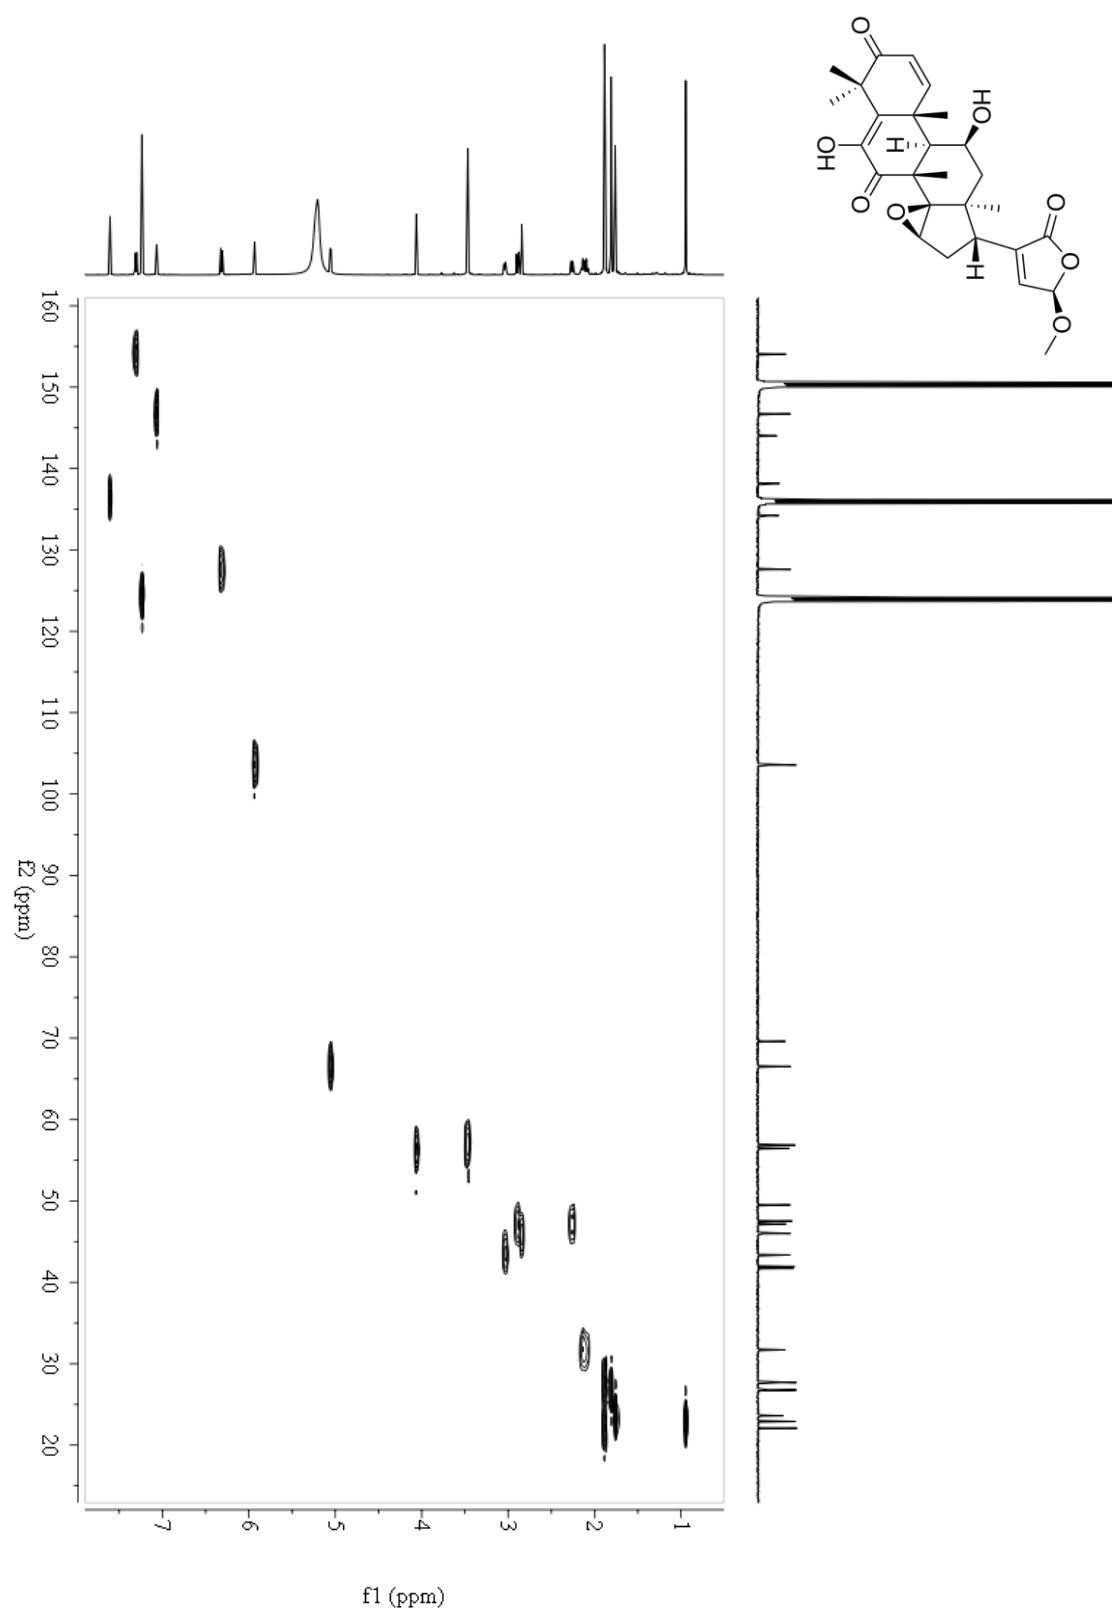

**Figure S16.** HMBC spectrum of walsunoid B (**2**) in C<sub>5</sub>D<sub>5</sub>N

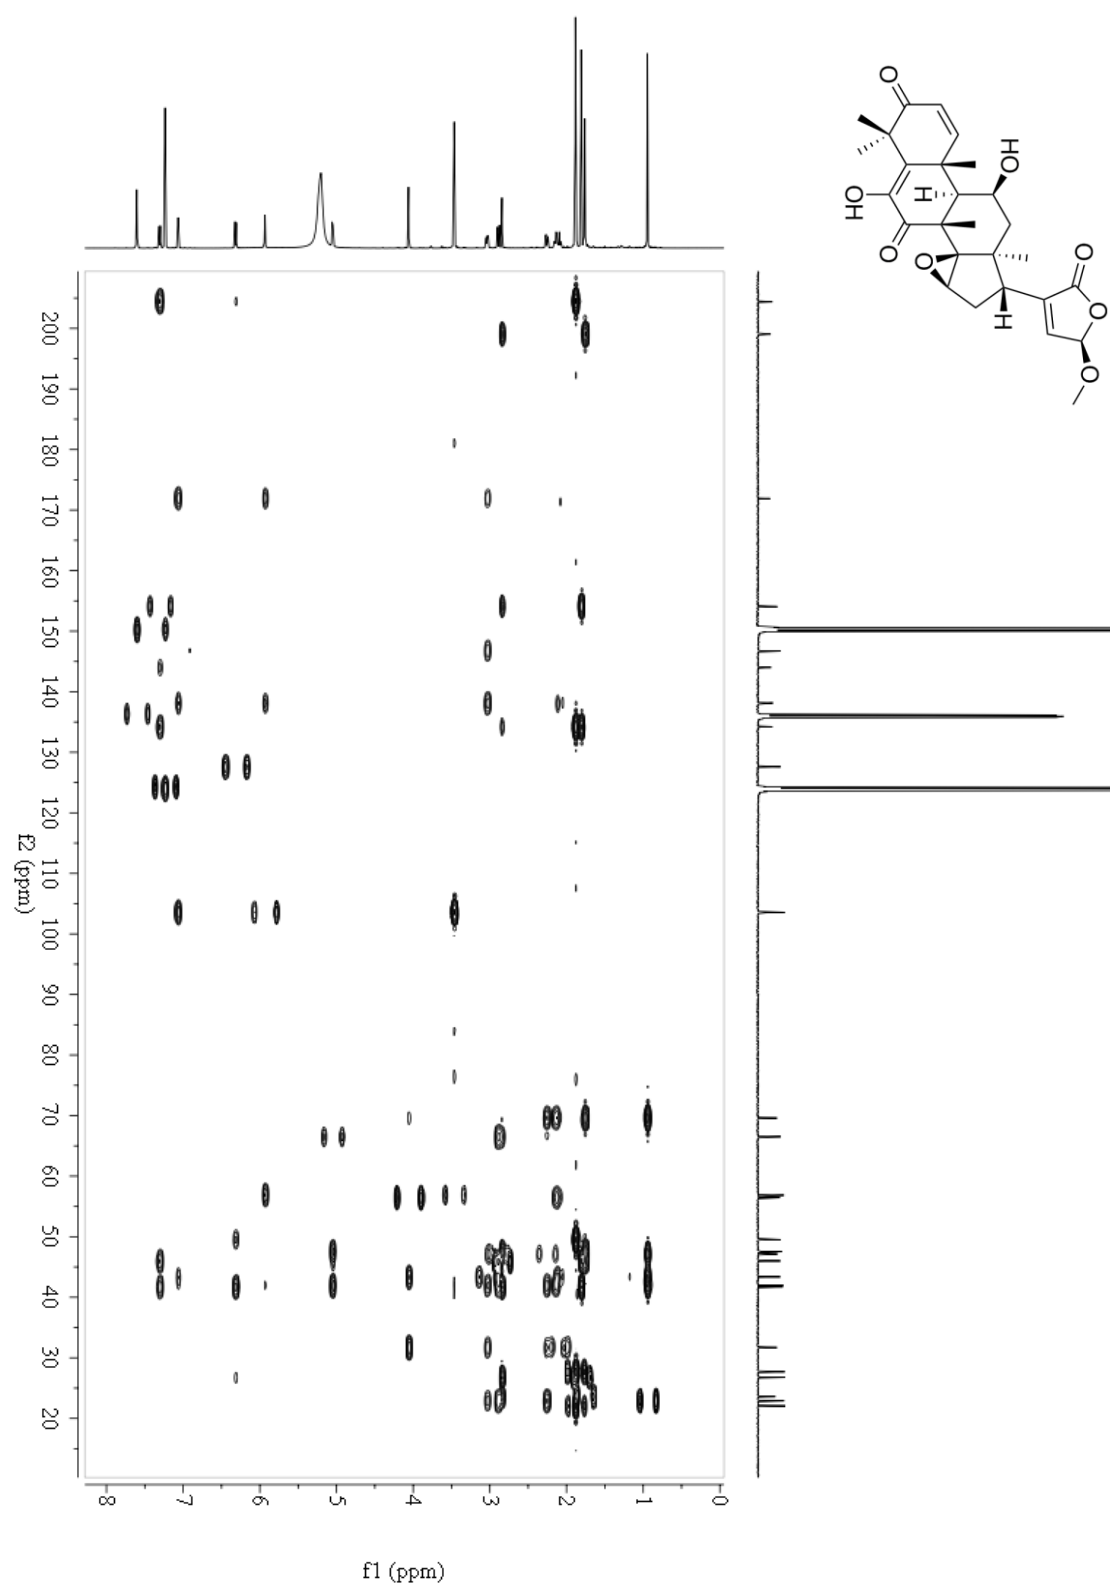

**Figure S17.** NOESY spectrum of walsunoid B (**2**) in C<sub>5</sub>D<sub>5</sub>N

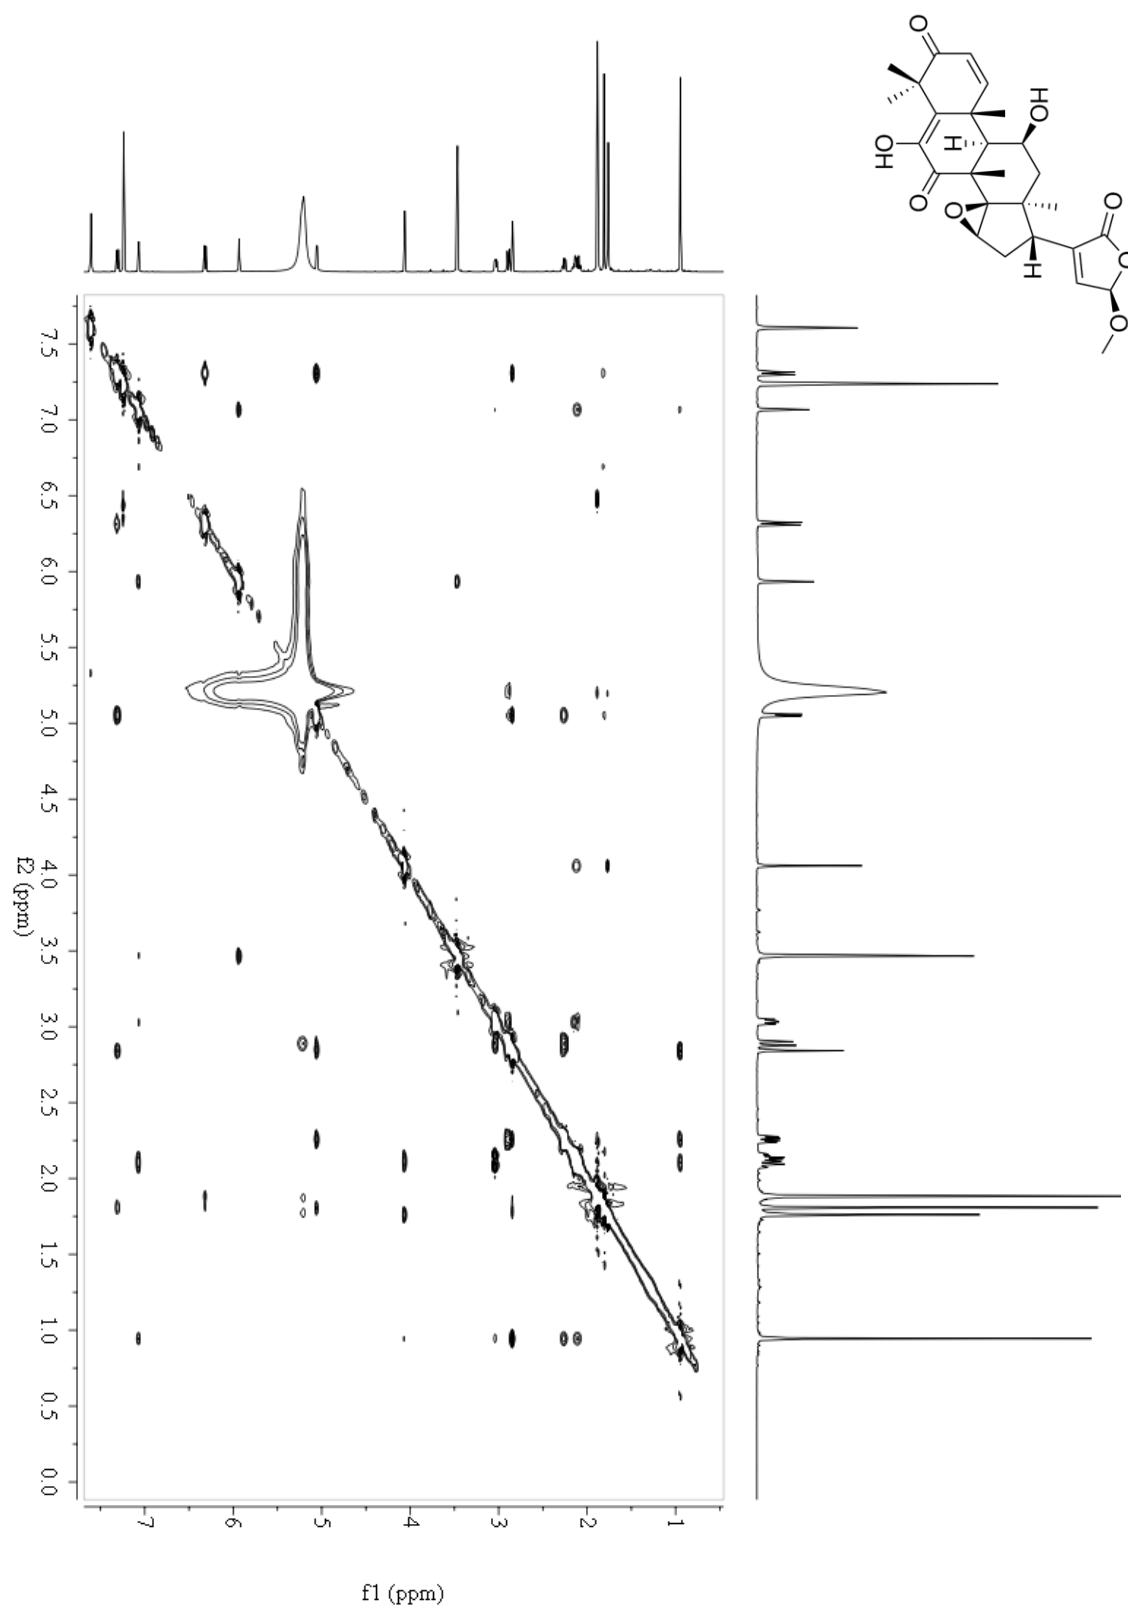

Figure S18. (+)-ESIMS spectrum of walsunoid B (2)

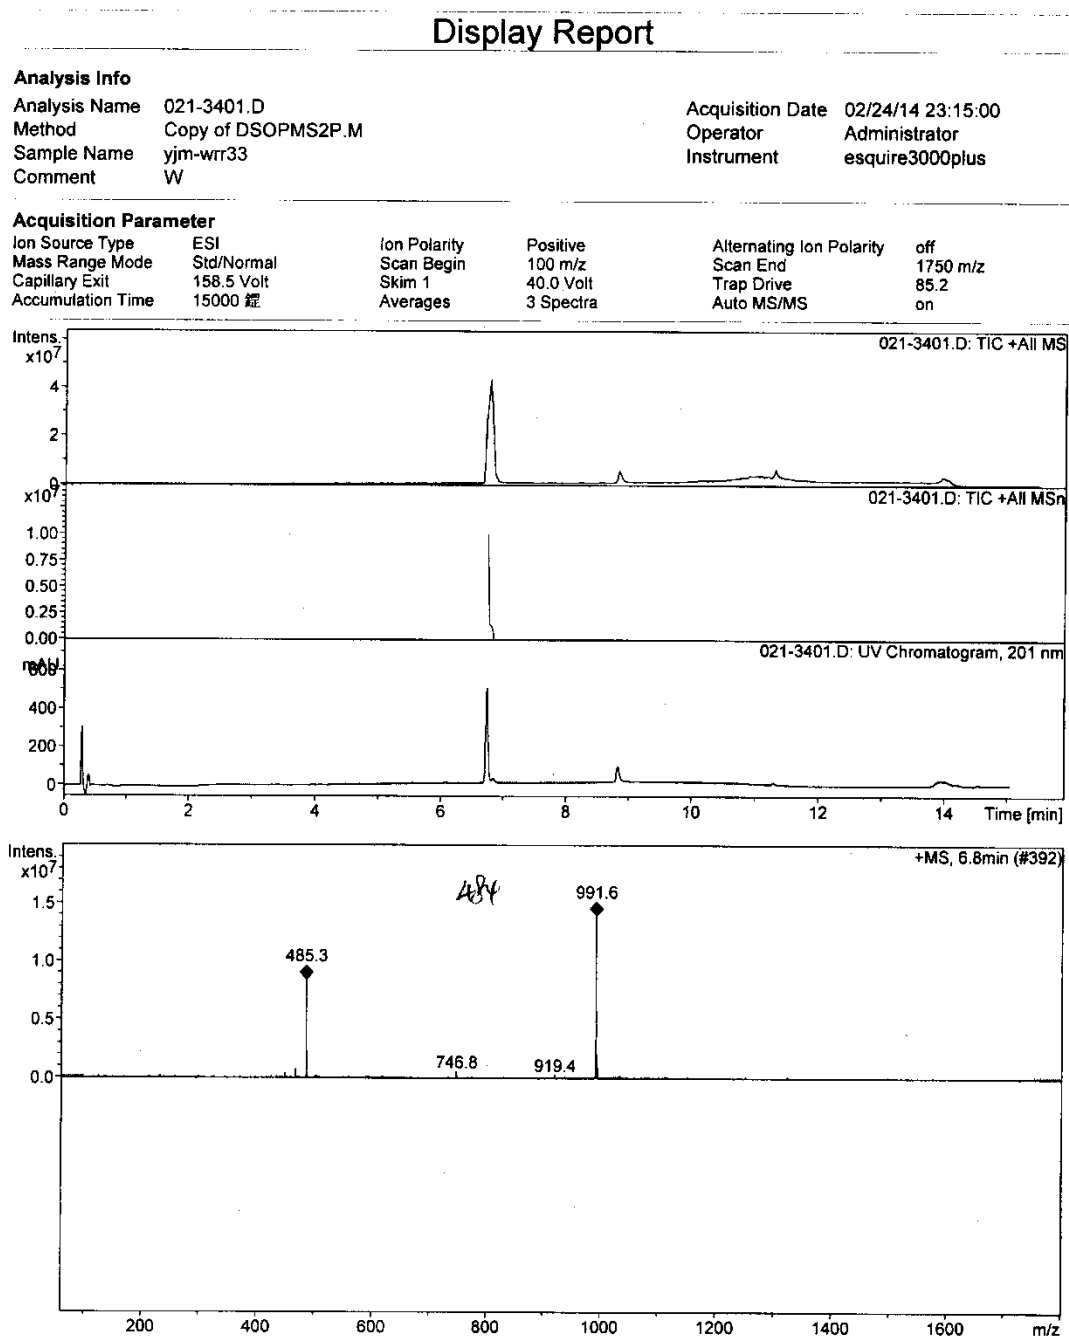

**Figure S19.** (-)-ESIMS spectrum of walsunoid B (2)

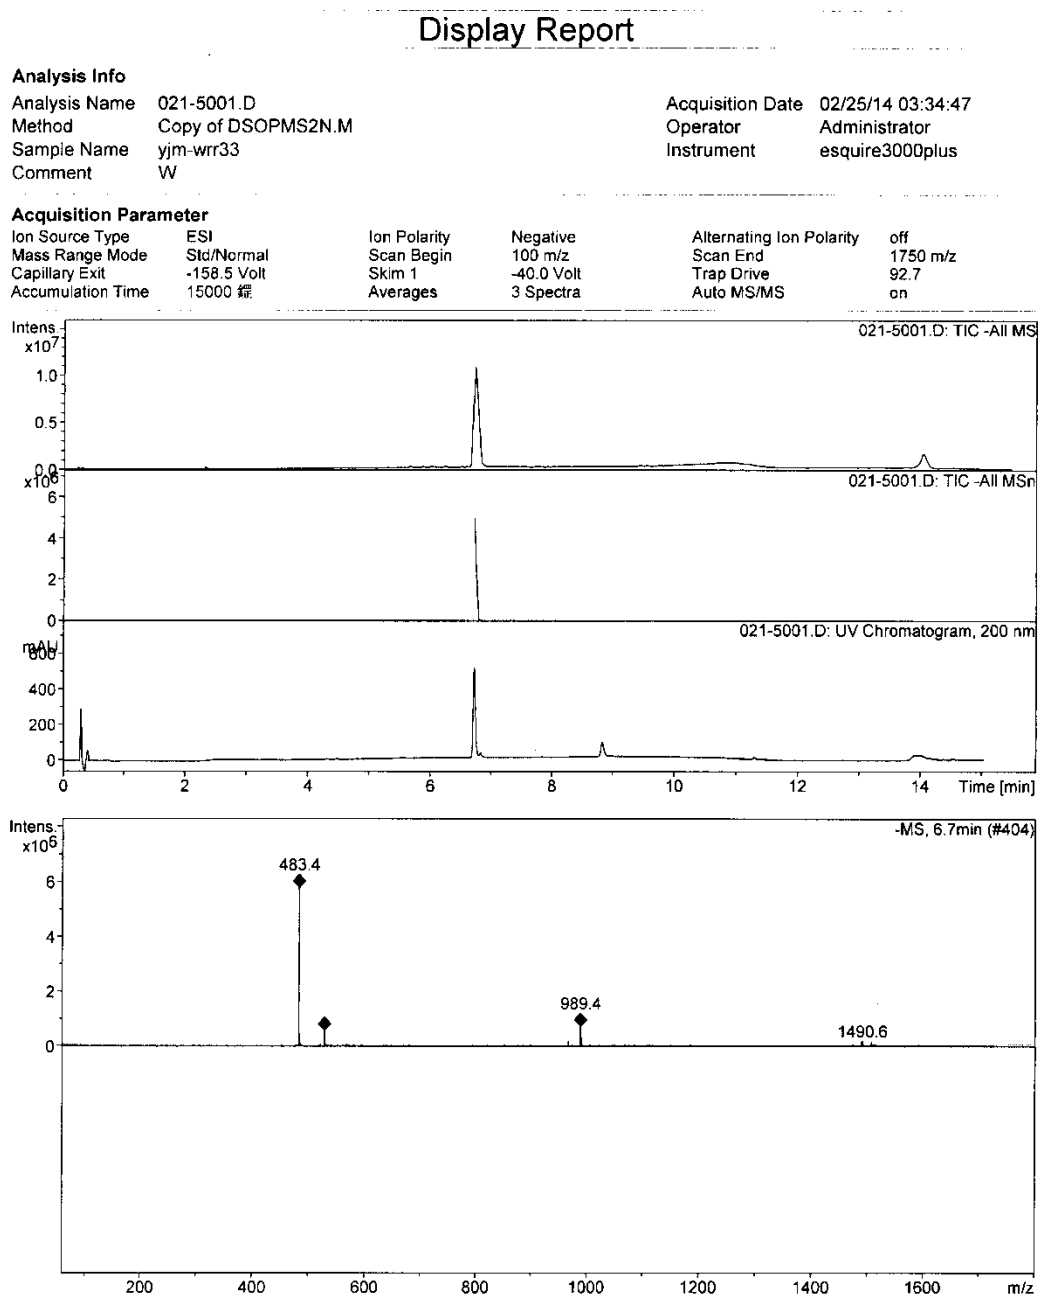

**Figure S20. (-)-HRESIMS spectrum of walsunoid B (2)**

**Elemental Composition Report**

**Page 1**

**Single Mass Analysis**

Tolerance = 5.0 PPM / DBE: min = -1.5, max = 50.0

Element prediction: Off

Number of isotope peaks used for i-FIT = 3

Monoisotopic Mass, Even Electron Ions

97 formula(e) evaluated with 1 results within limits (up to 50 closest results for each mass)

Elements Used:

C: 5-80 H: 2-120 O: 0-20

wrr33

LCT PXE KE324

03-Apr-2014

15:31:04

1: TOF MS ES-

9.63e+003

wrr33\_0403 13 (0.284) AM2 (Ar,10000.0,0.00,1.00); ABS; Cm (9:23)

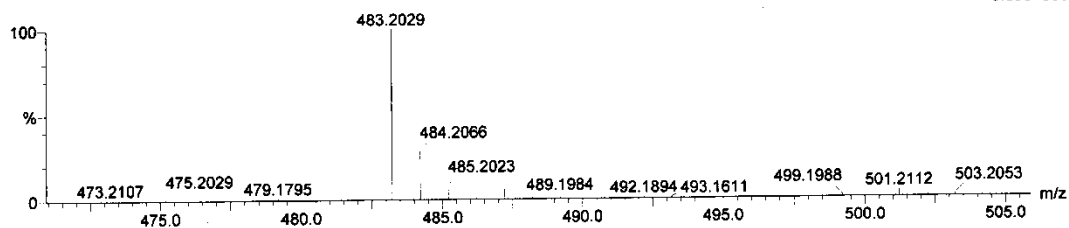

Minimum: -1.5  
Maximum: 5.0 5.0 50.0

| Mass     | Calc. Mass | mDa | PPM | DBE  | i-FIT | i-FIT (Norm) | Formula    |
|----------|------------|-----|-----|------|-------|--------------|------------|
| 483.2029 | 483.2019   | 1.0 | 2.1 | 12.5 | 125.0 | 0.0          | C27 H31 O8 |

**Figure S21.** IR spectrum of walsunoid B (**2**)

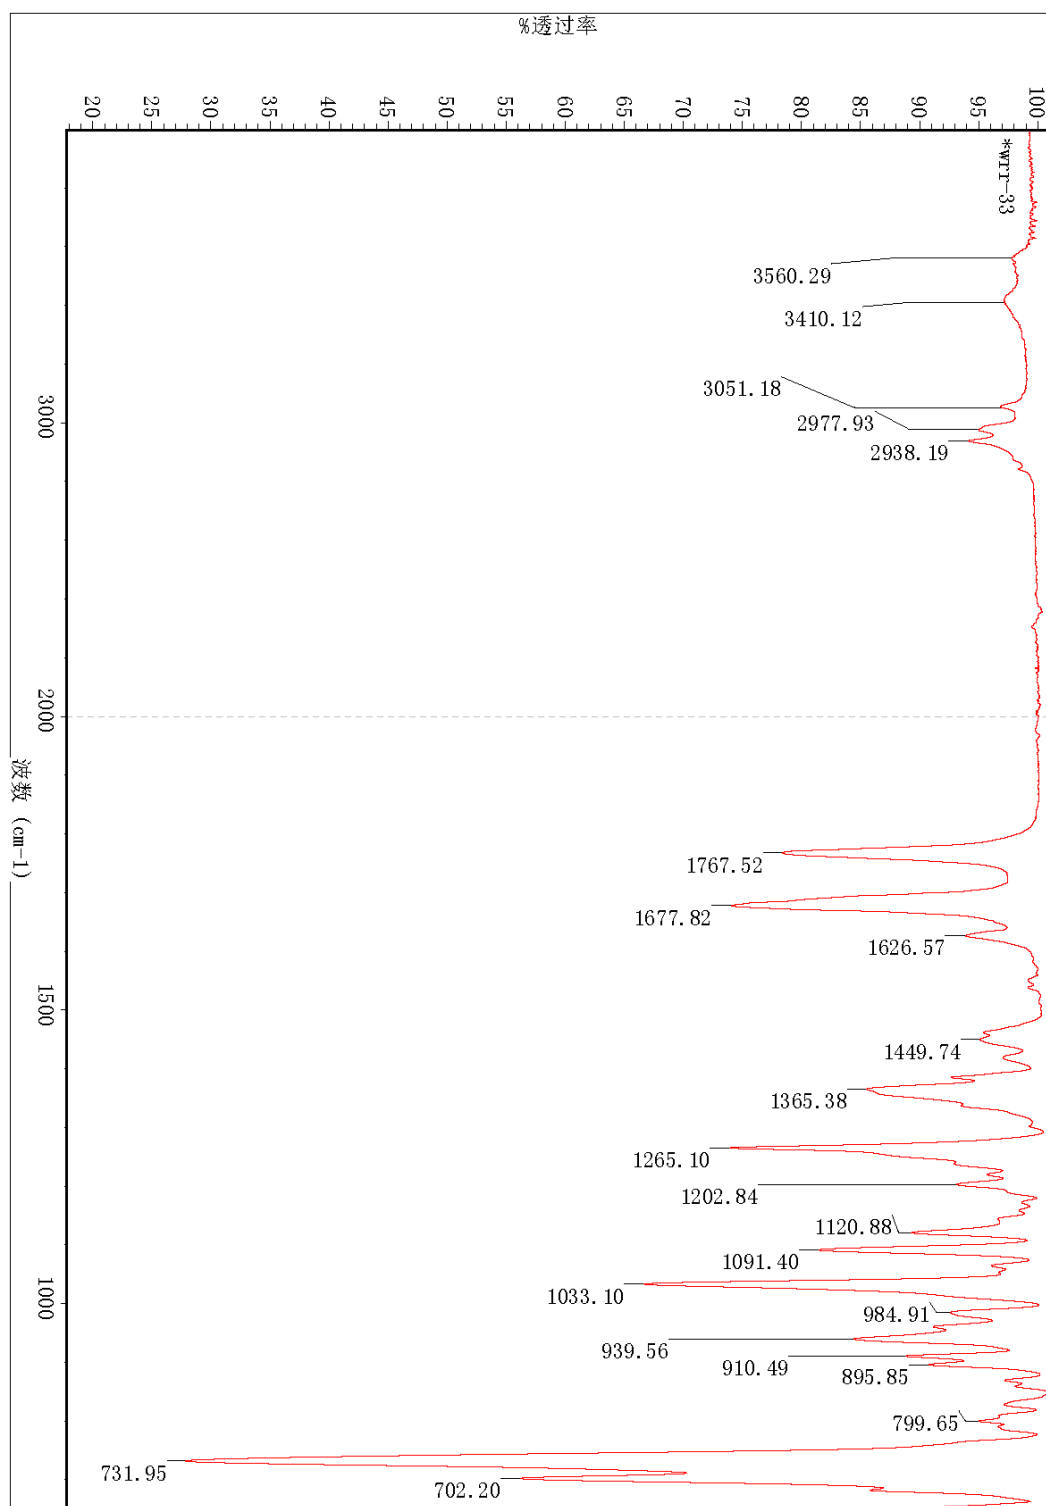

**Figure S22.**  $^1\text{H}$  NMR spectrum of walsunoid C (**3**) in  $\text{C}_5\text{D}_5\text{N}$

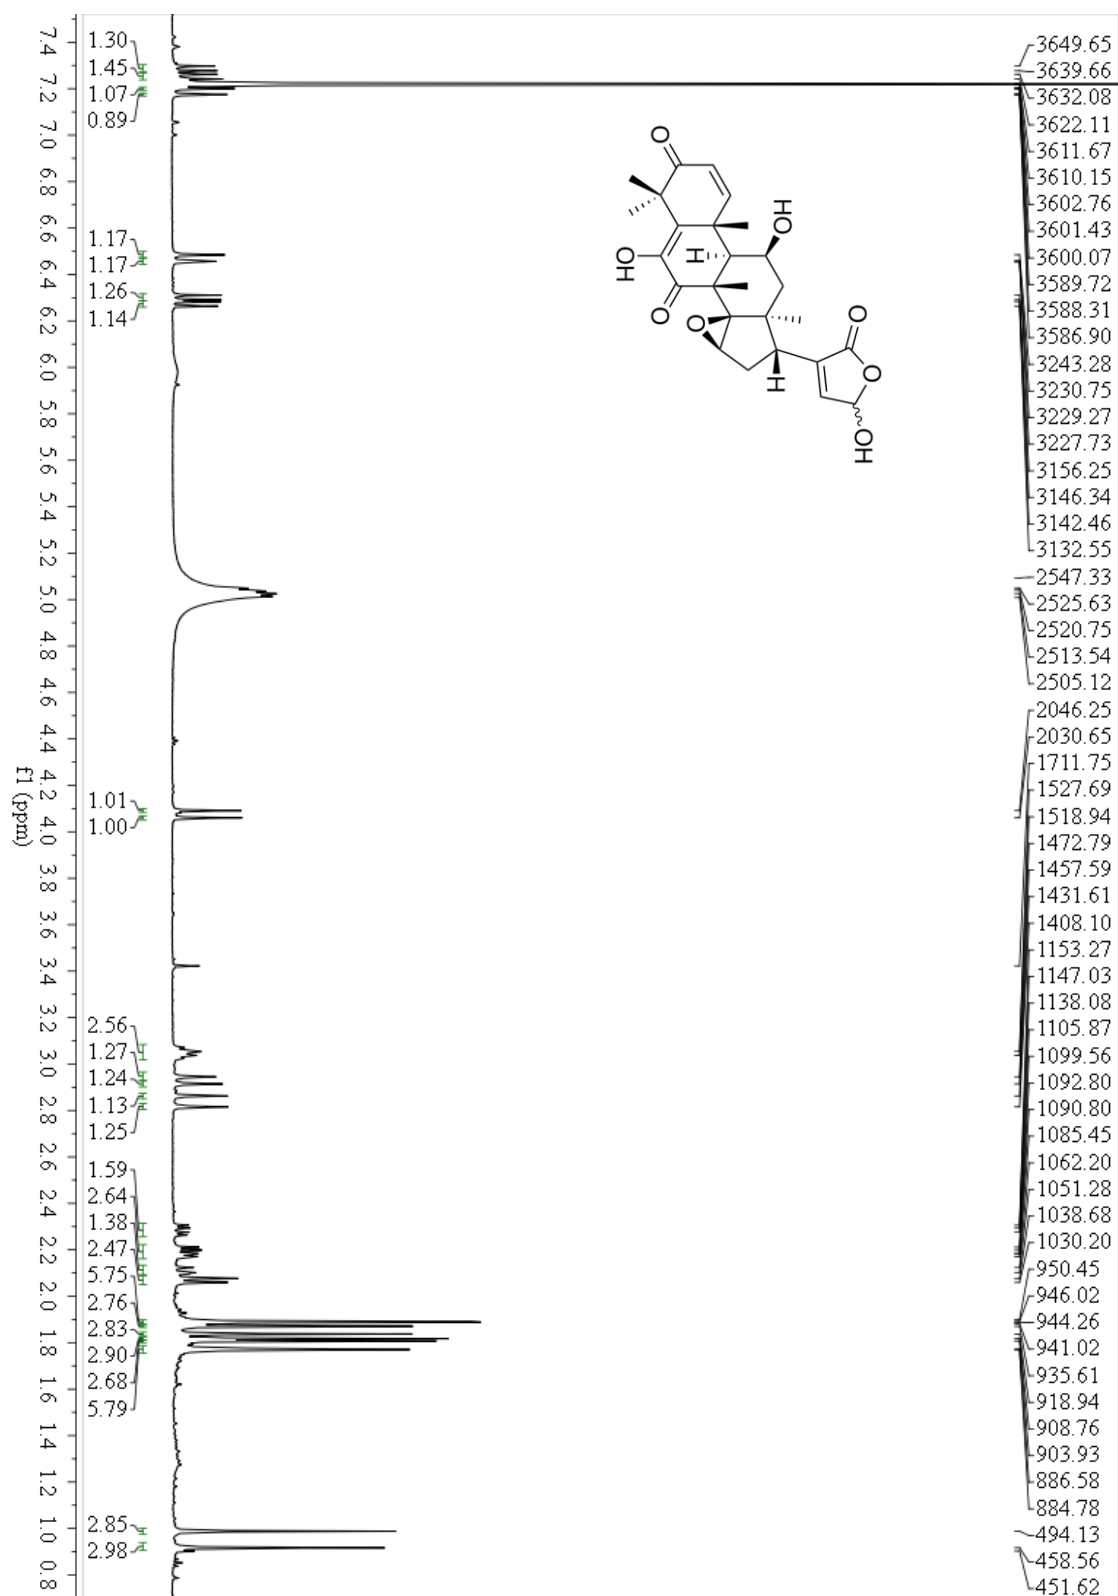



**Figure S23.**  $^{13}\text{C}$  NMR spectrum of walsunoid C (**3**) in  $\text{C}_5\text{D}_5\text{N}$

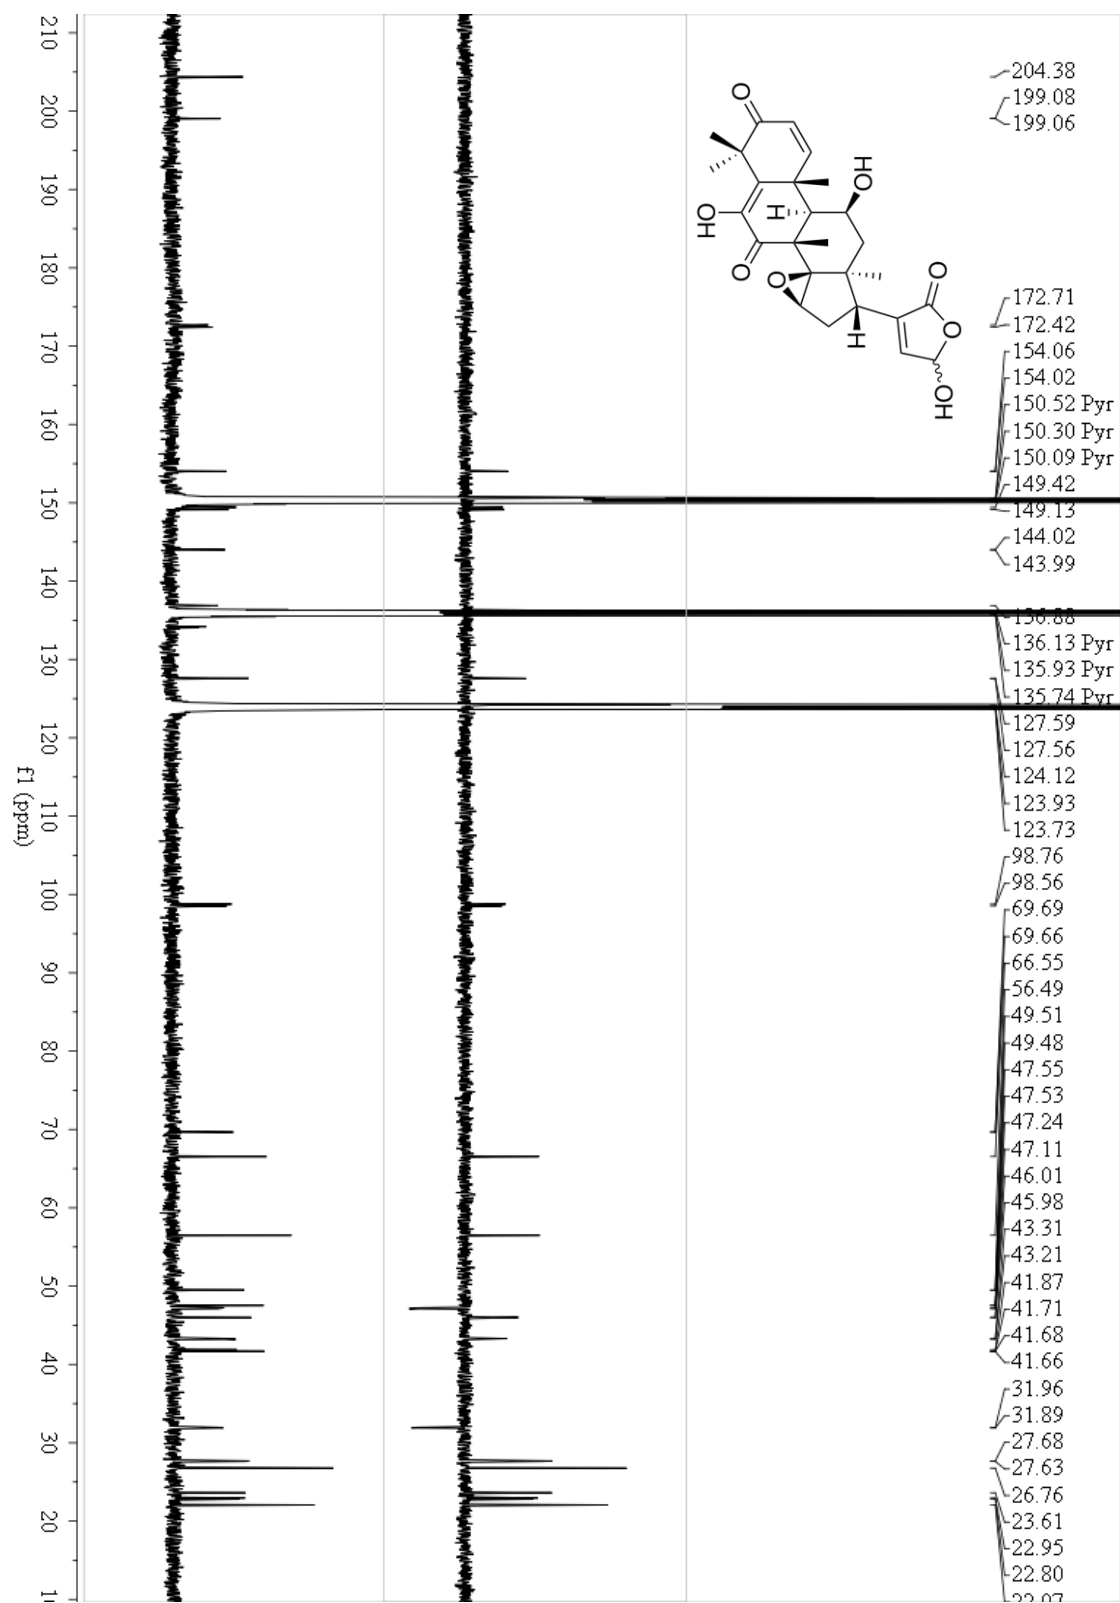

**Figure S24.** HSQC spectrum of walsunoid C (**3**) in C<sub>5</sub>D<sub>5</sub>N

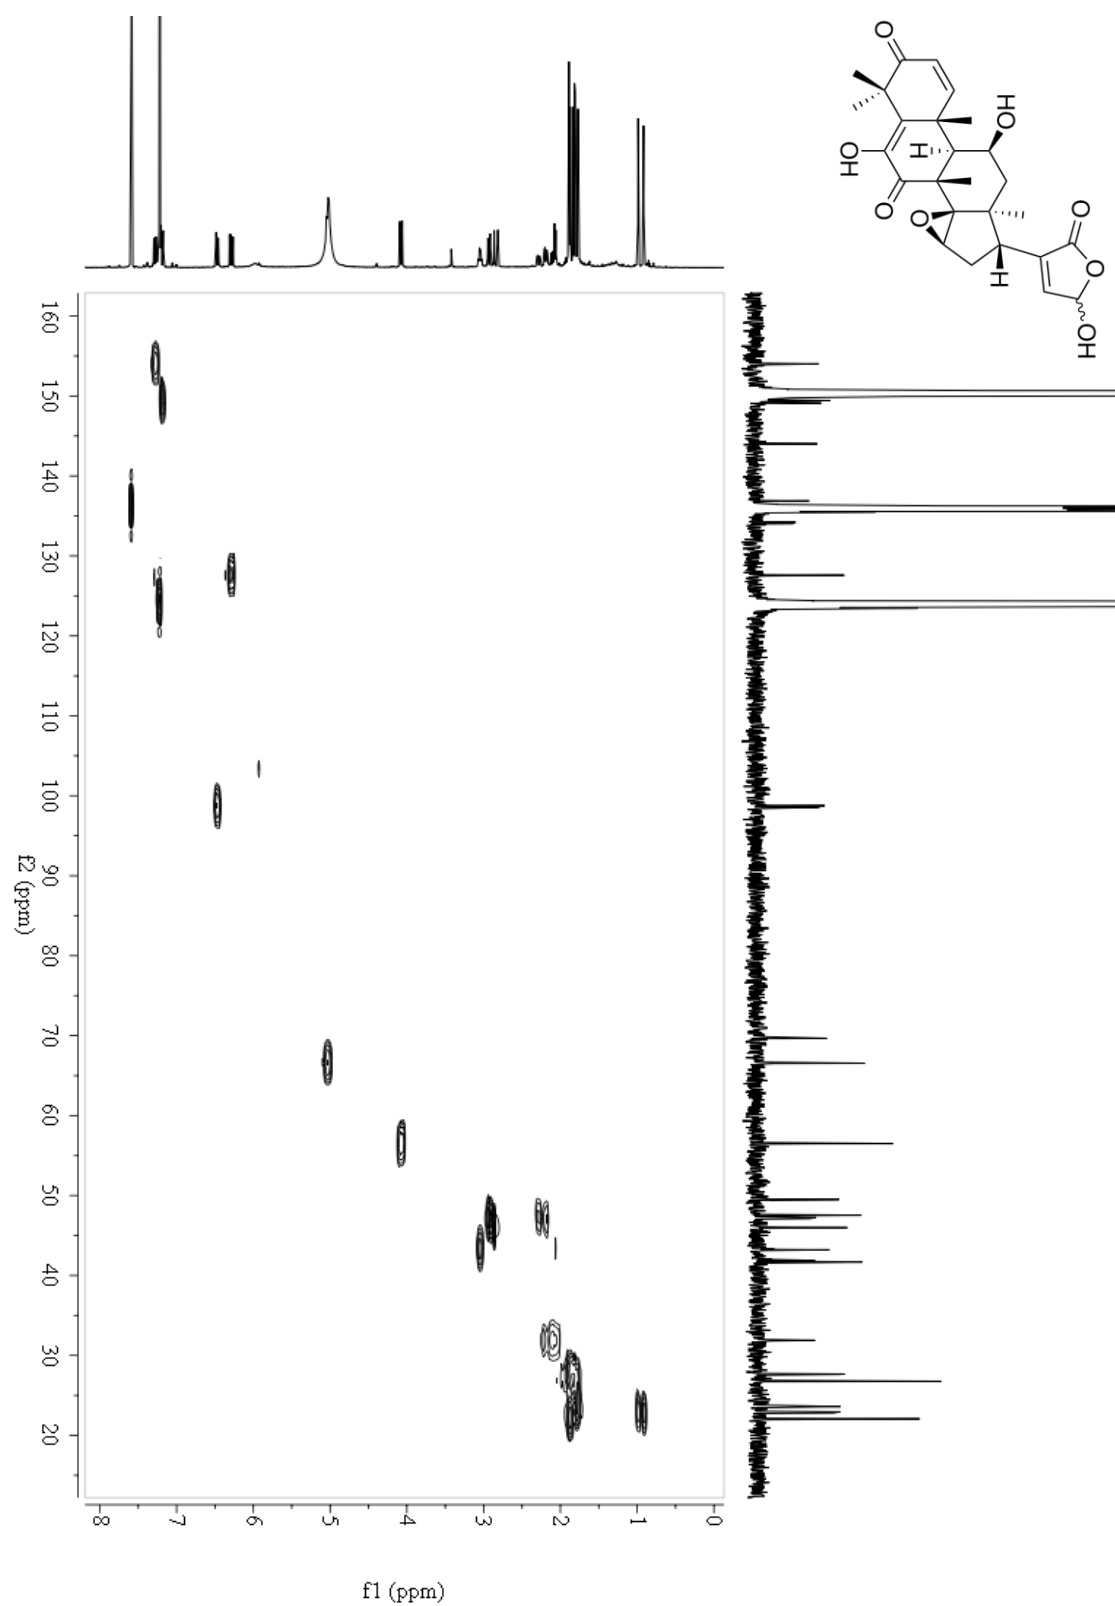

**Figure S25.** HMBC spectrum of walsunoid C (**3**) in C<sub>5</sub>D<sub>5</sub>N

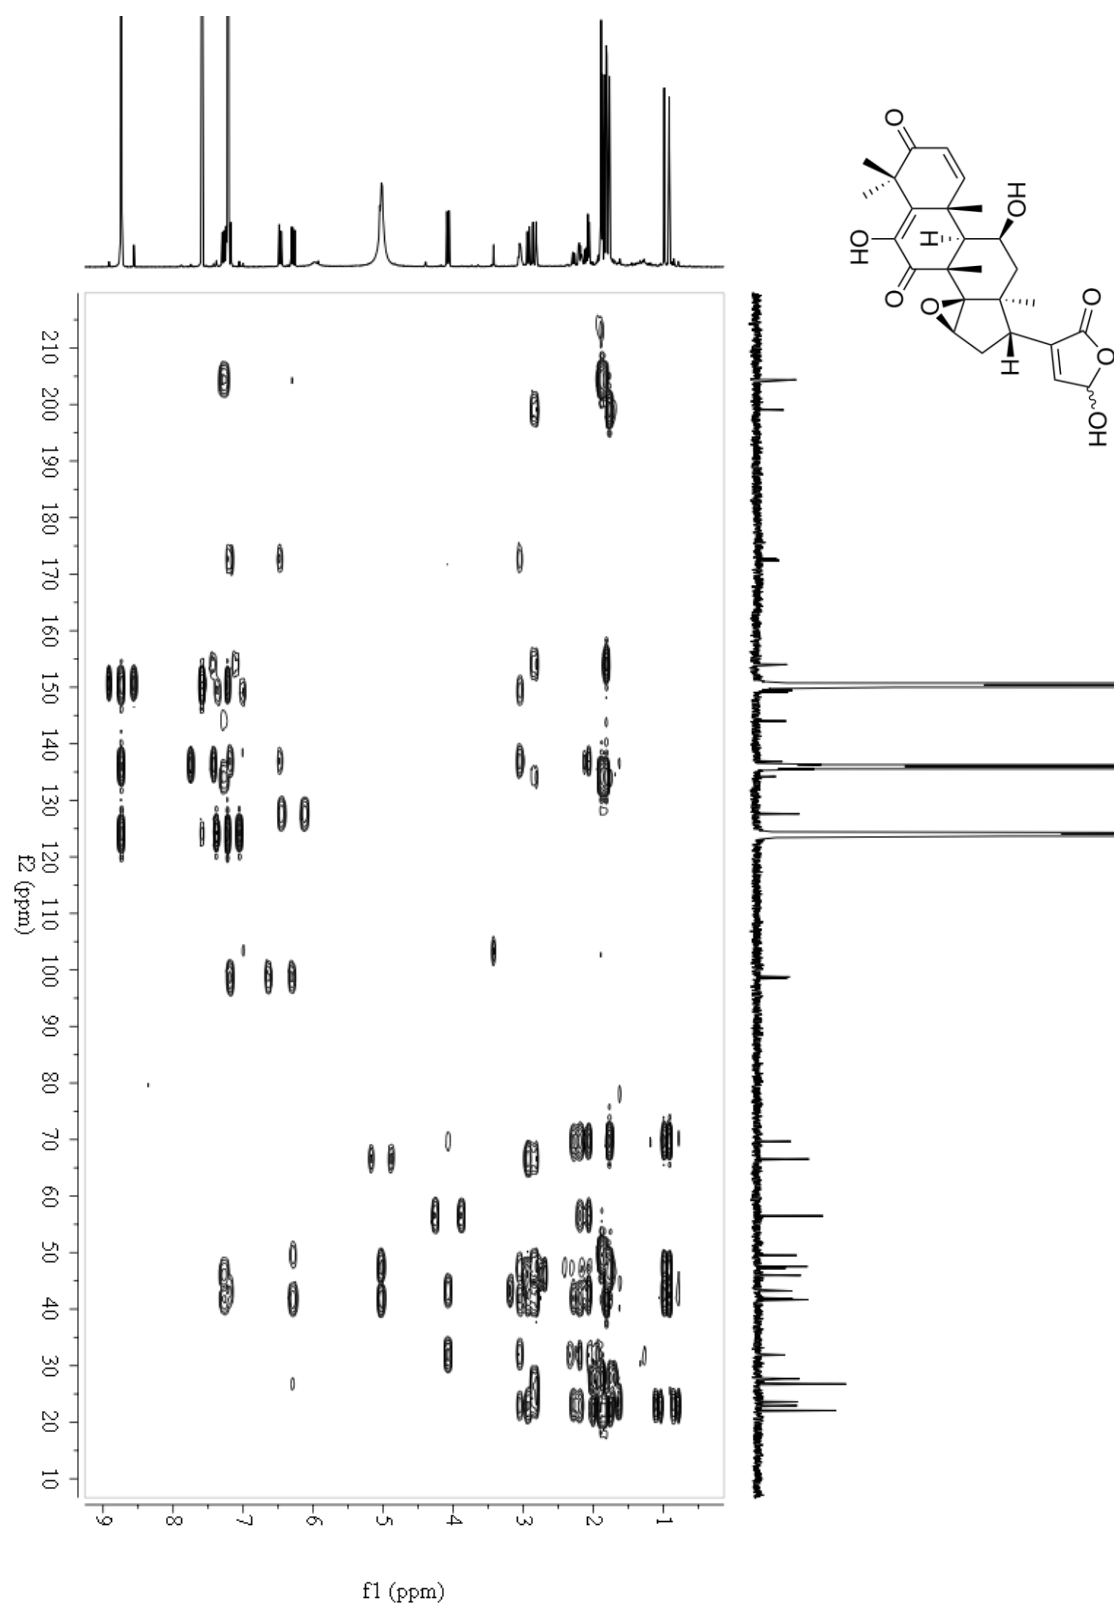

The figure displays the chemical structure of compound **1** and its corresponding NMR spectra. The chemical structure is a complex polycyclic molecule featuring a quinone-like core, a fused cyclohexane ring, and a side chain containing a carboxylic acid group. The structure is labeled with stereochemistry (R/S) and various functional groups (OH, O, COOH).

The NMR spectra are shown below the structure. The <sup>1</sup>H NMR spectrum (top) is recorded in CDCl<sub>3</sub> and shows peaks in the aromatic region (6.5–7.5 ppm), a broad peak for the carboxylic acid proton (~11.5 ppm), and aliphatic protons (1.5–4.5 ppm). The <sup>13</sup>C NMR spectrum (bottom) shows peaks from 10 to 170 ppm, including carbonyl carbons and aliphatic carbons. The chemical shift ranges for both spectra are indicated on the axes.

36

Figure S27. (+)-ESIMS spectrum of walsunoid C (3)

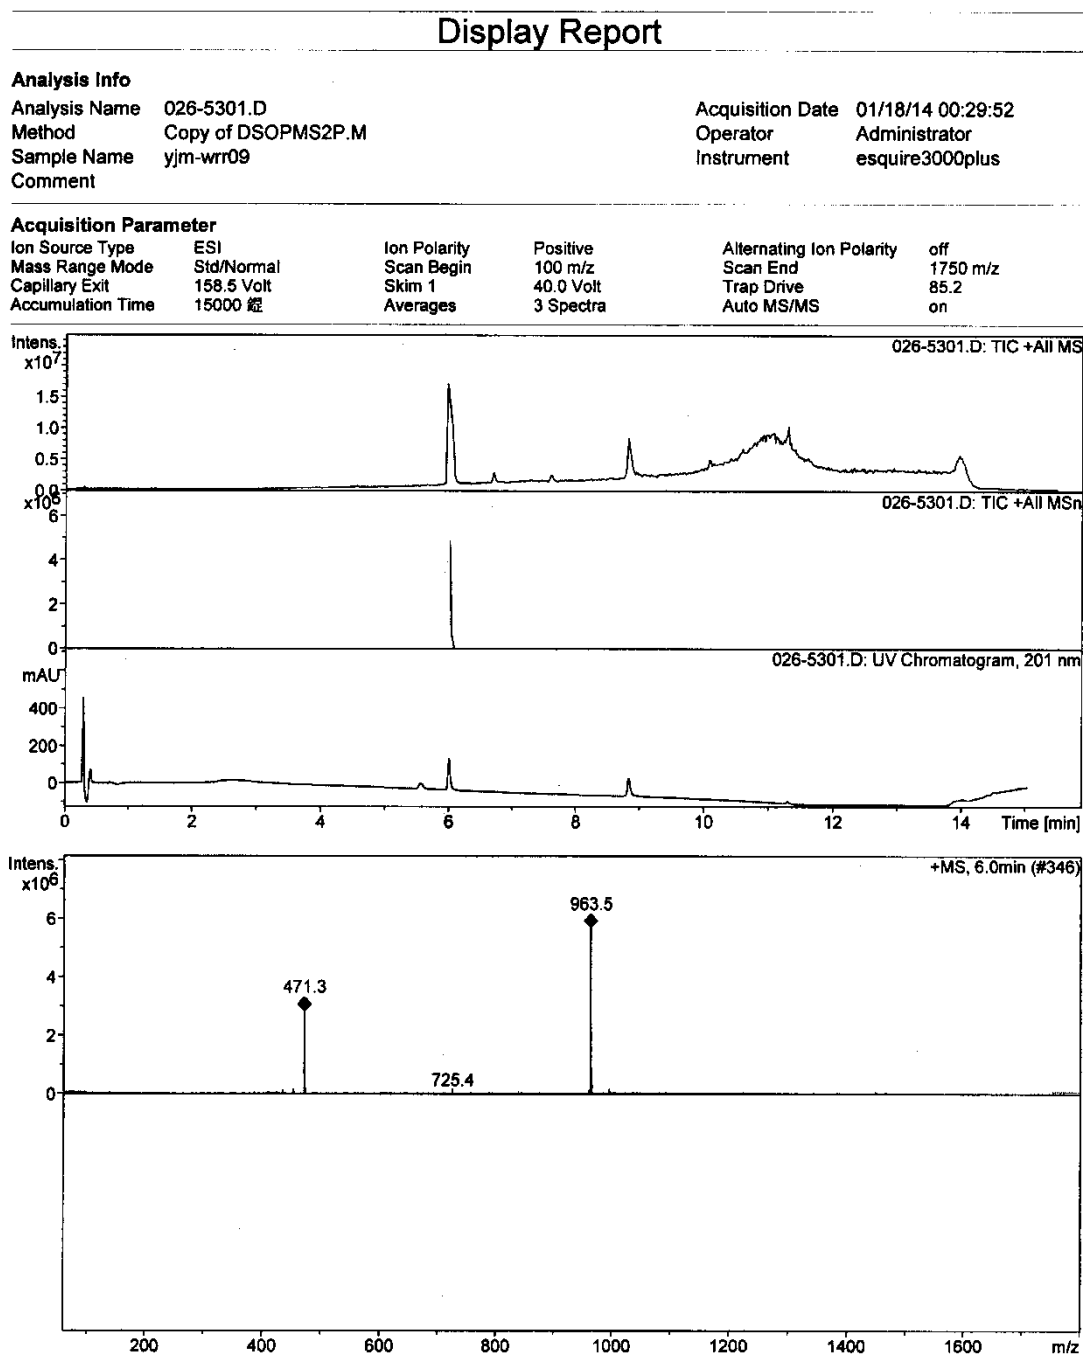

Figure S28. (-)-ESIMS spectrum of walsunoid C (3)

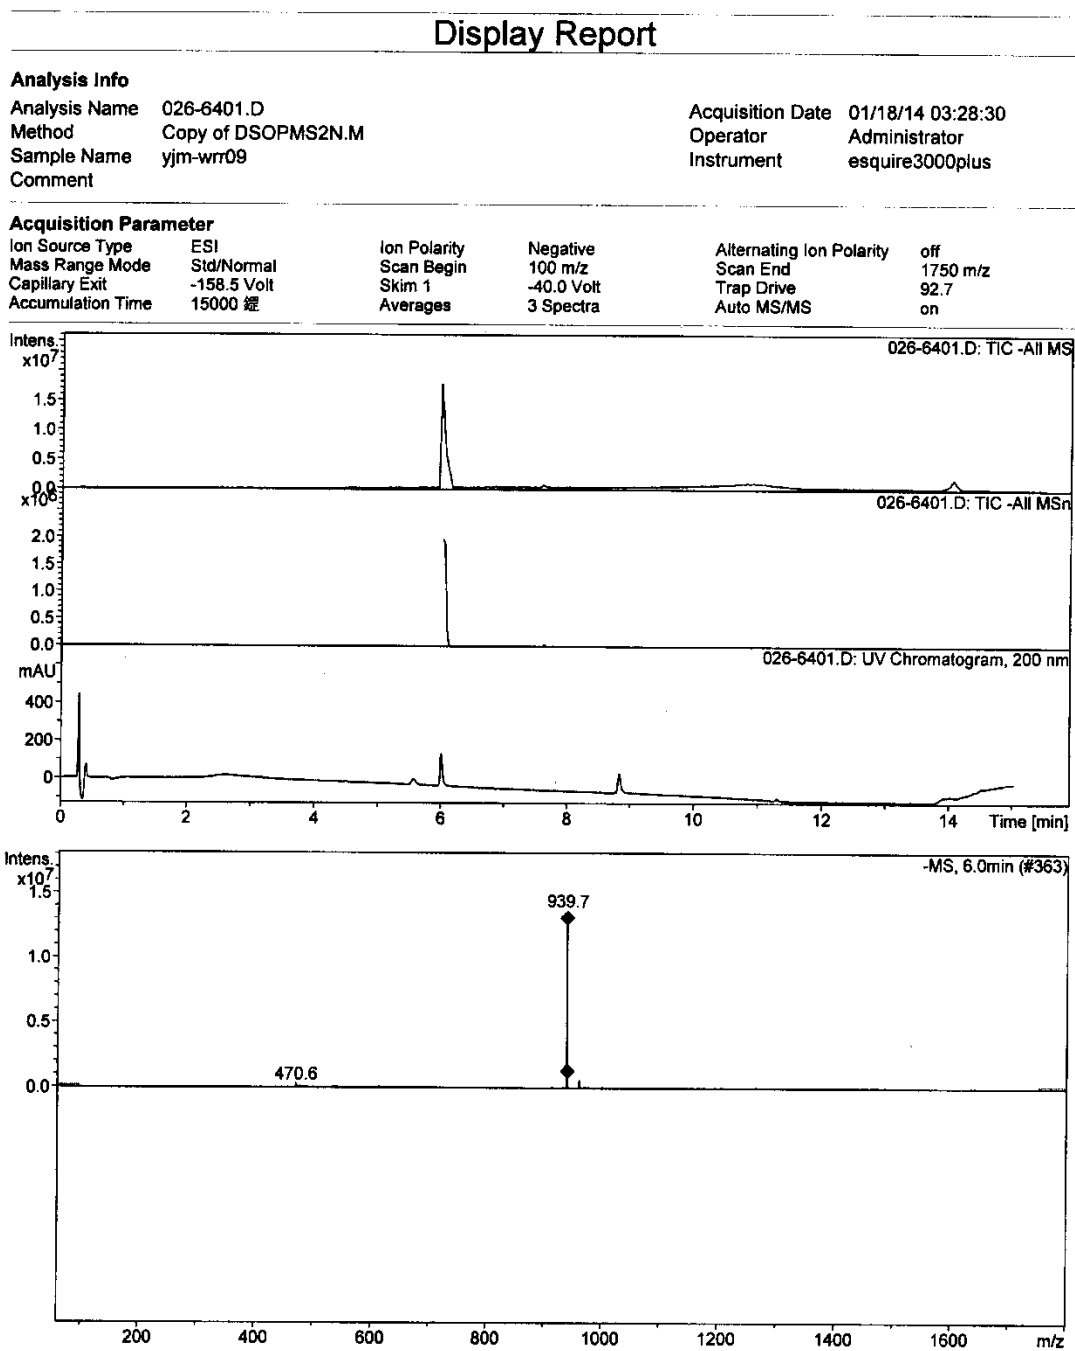

**Figure S29. (-)-HRESIMS spectrum of walsunoid C (3)**

**Elemental Composition Report**

**Page 1**

**Single Mass Analysis**

Tolerance = 5.0 PPM / DBE: min = -1.5, max = 50.0

Element prediction: Off

Number of isotope peaks used for i-FIT = 3

Monoisotopic Mass, Even Electron Ions

90 formula(e) evaluated with 1 results within limits (up to 50 closest results for each mass)

Elements Used:

C: 5-80 H: 2-120 O: 0-20

wrr09

LCT PXE KE324

03-Apr-2014

15:43:20

wrr09\_0403 18 (0.372) AM2 (Ar,10000.0,0.00,1.00); ABS; Cm (5.22)

1: TOF MS ES-  
1.04e+004

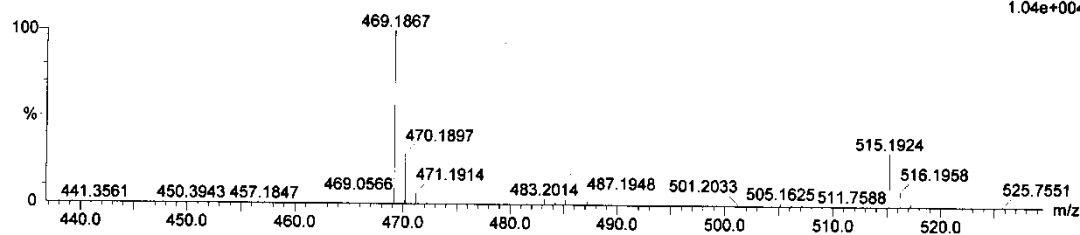

Minimum:

Maximum:

5.0

5.0

50.0

Mass

Calc. Mass

mDa

PPM

DBE

i-FIT

i-FIT (Norm)

Formula

469.1867

469.1862

0.5

1.1

12.5

119.6

0.0

C26 H29 O8

**Figure S30.** IR spectrum of walsunoid C (**3**)

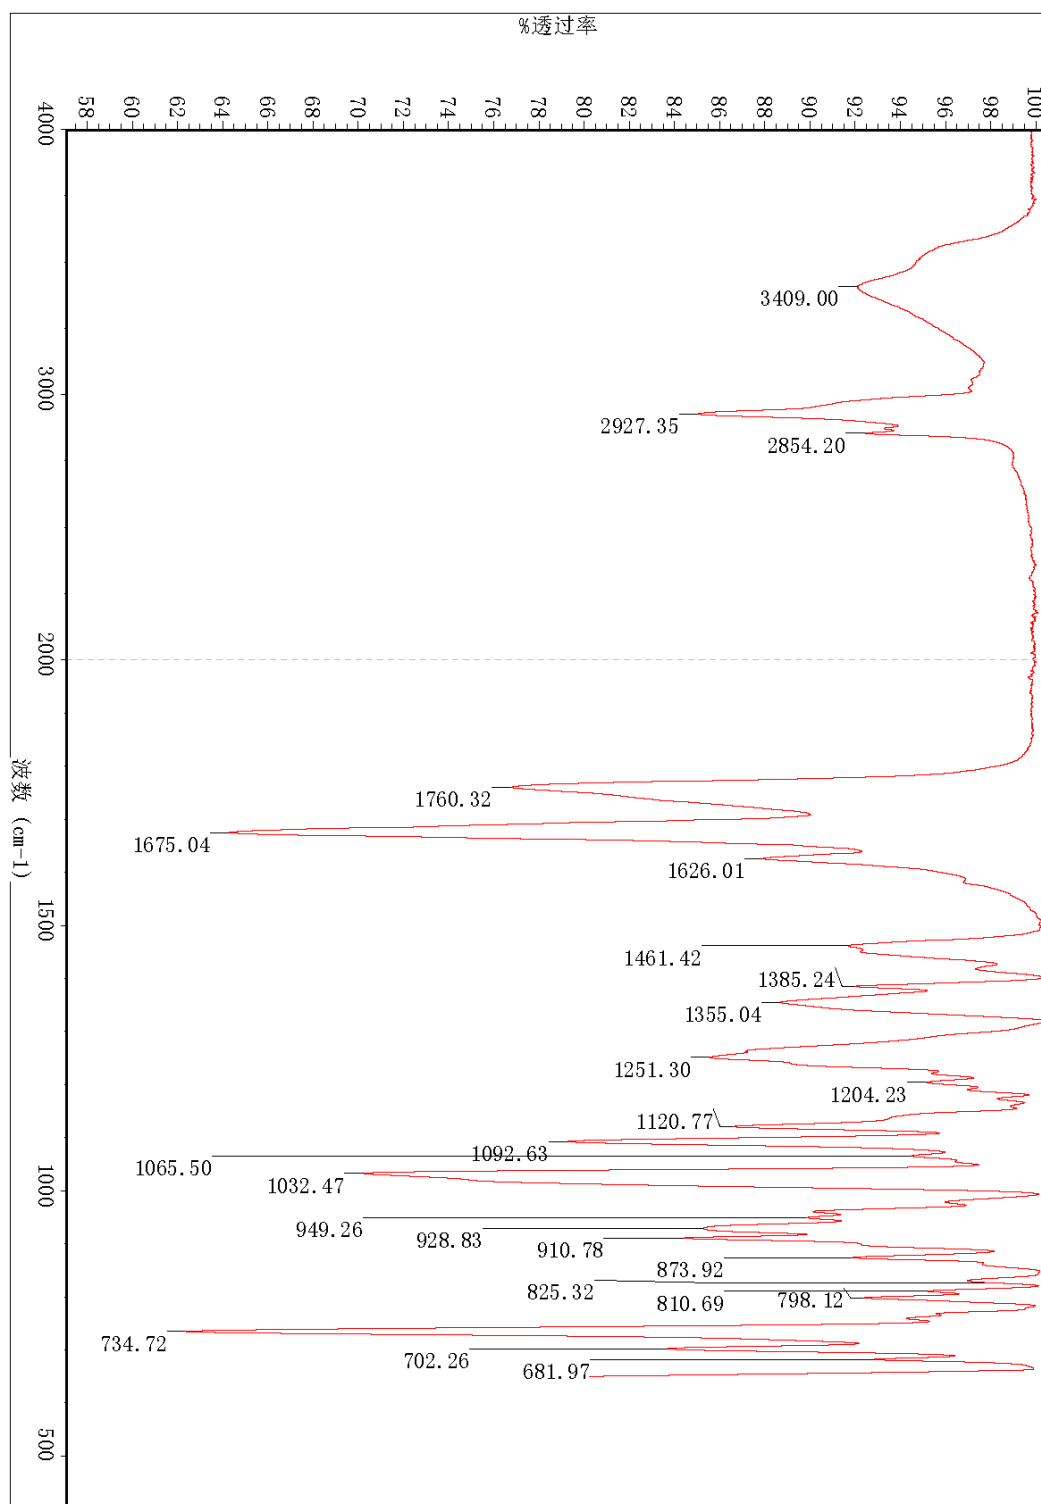



**Figure S31.**  $^1\text{H}$  NMR spectrum of walsunoid D (**4**) in  $\text{CDCl}_3$

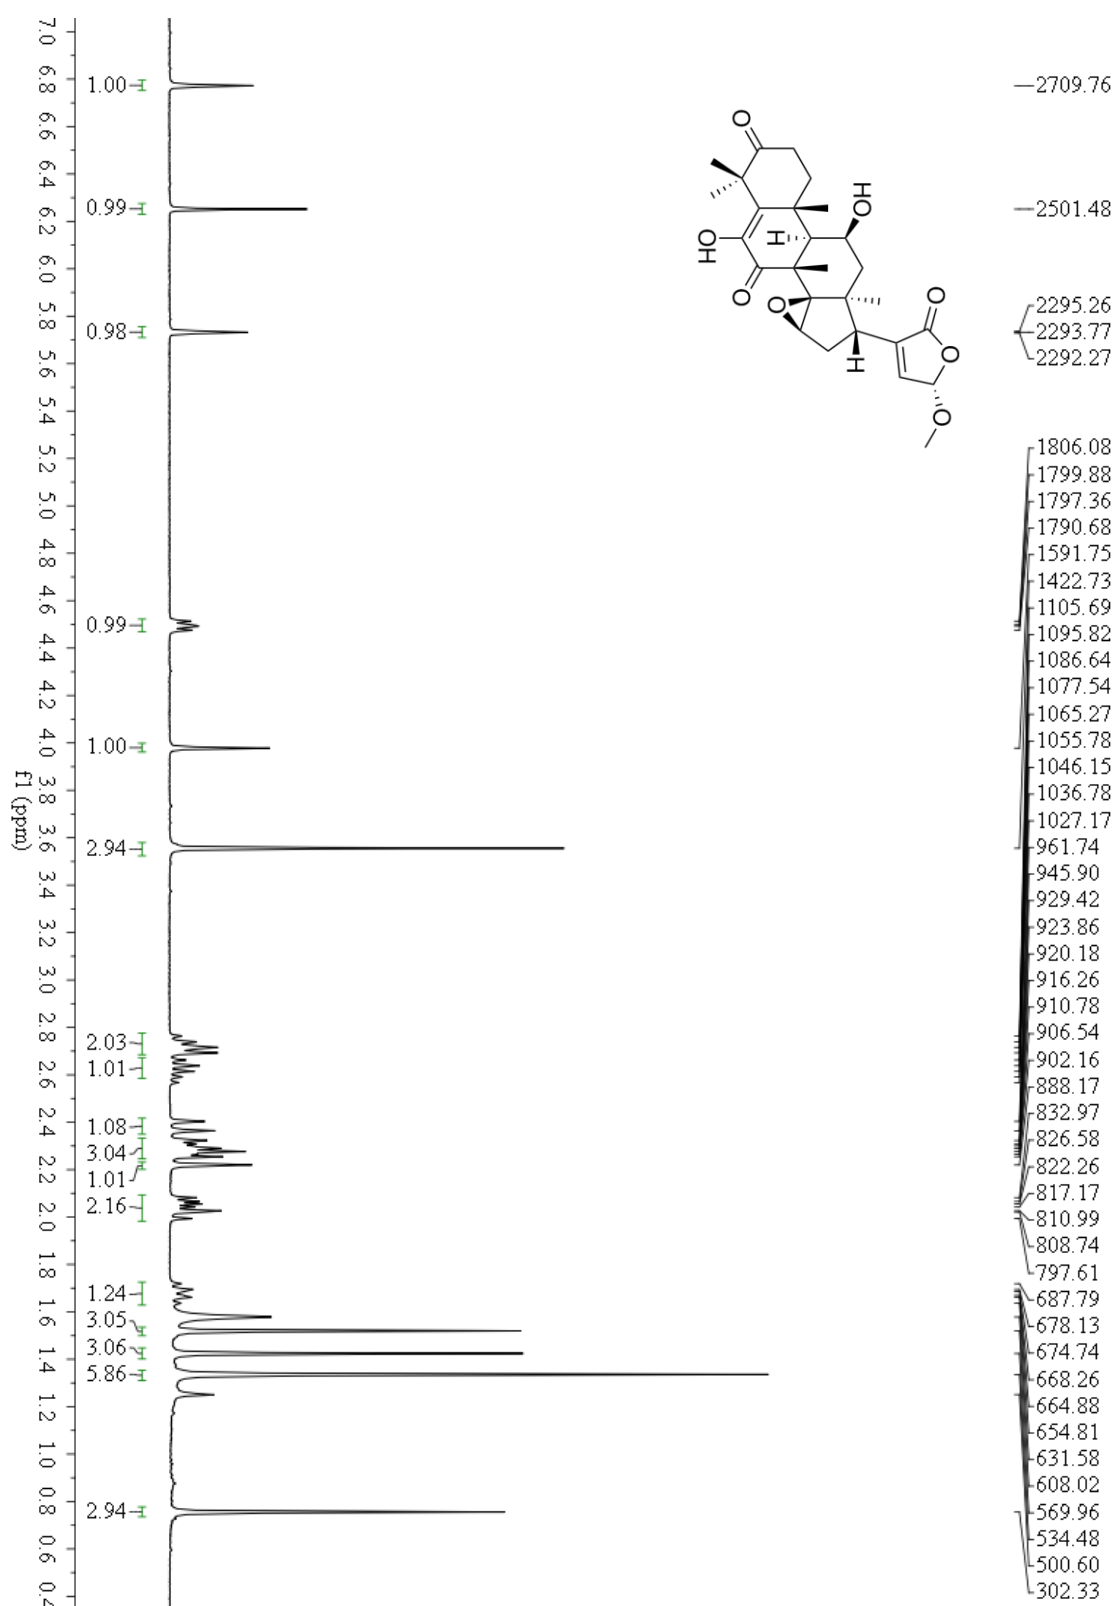

**Figure S32.**  $^{13}\text{C}$  NMR spectrum of walsunoid D (**4**) in  $\text{CDCl}_3$

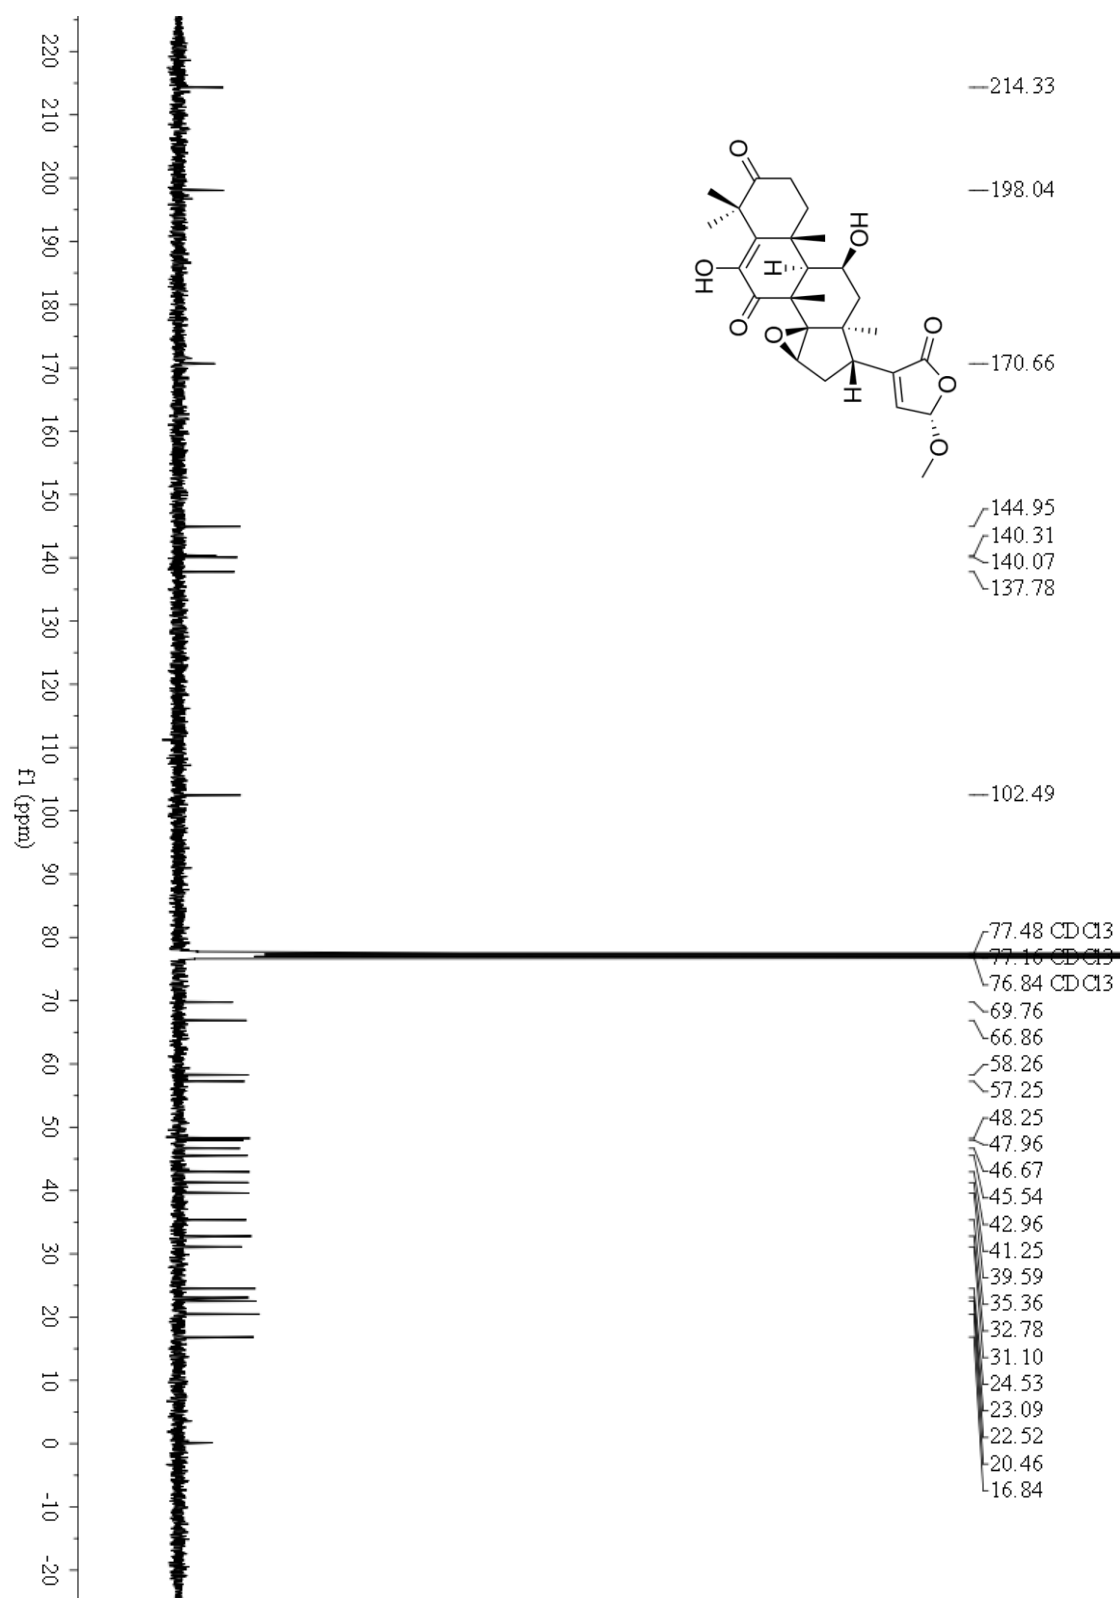

**Figure S33.** HSQC spectrum of walsunoid D (**4**) in CDCl<sub>3</sub>

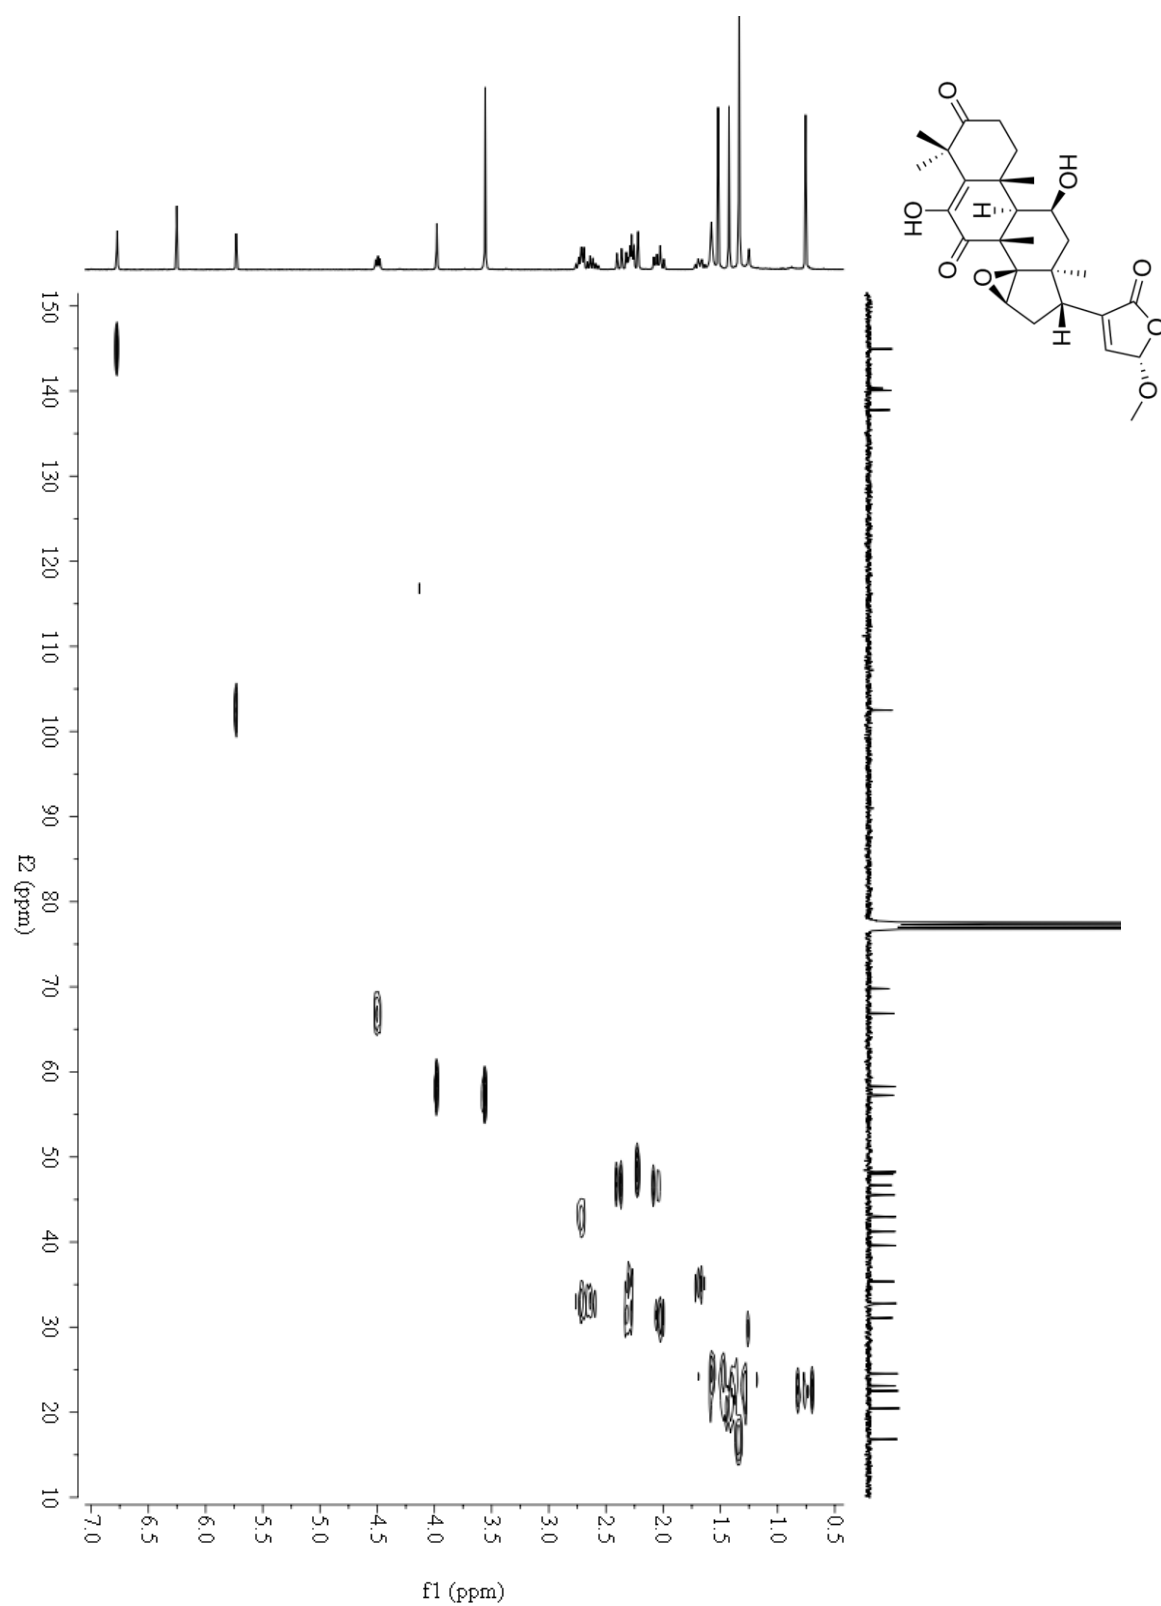

**Figure S34.** HMBC spectrum of walsunoid D (**4**) in CDCl<sub>3</sub>

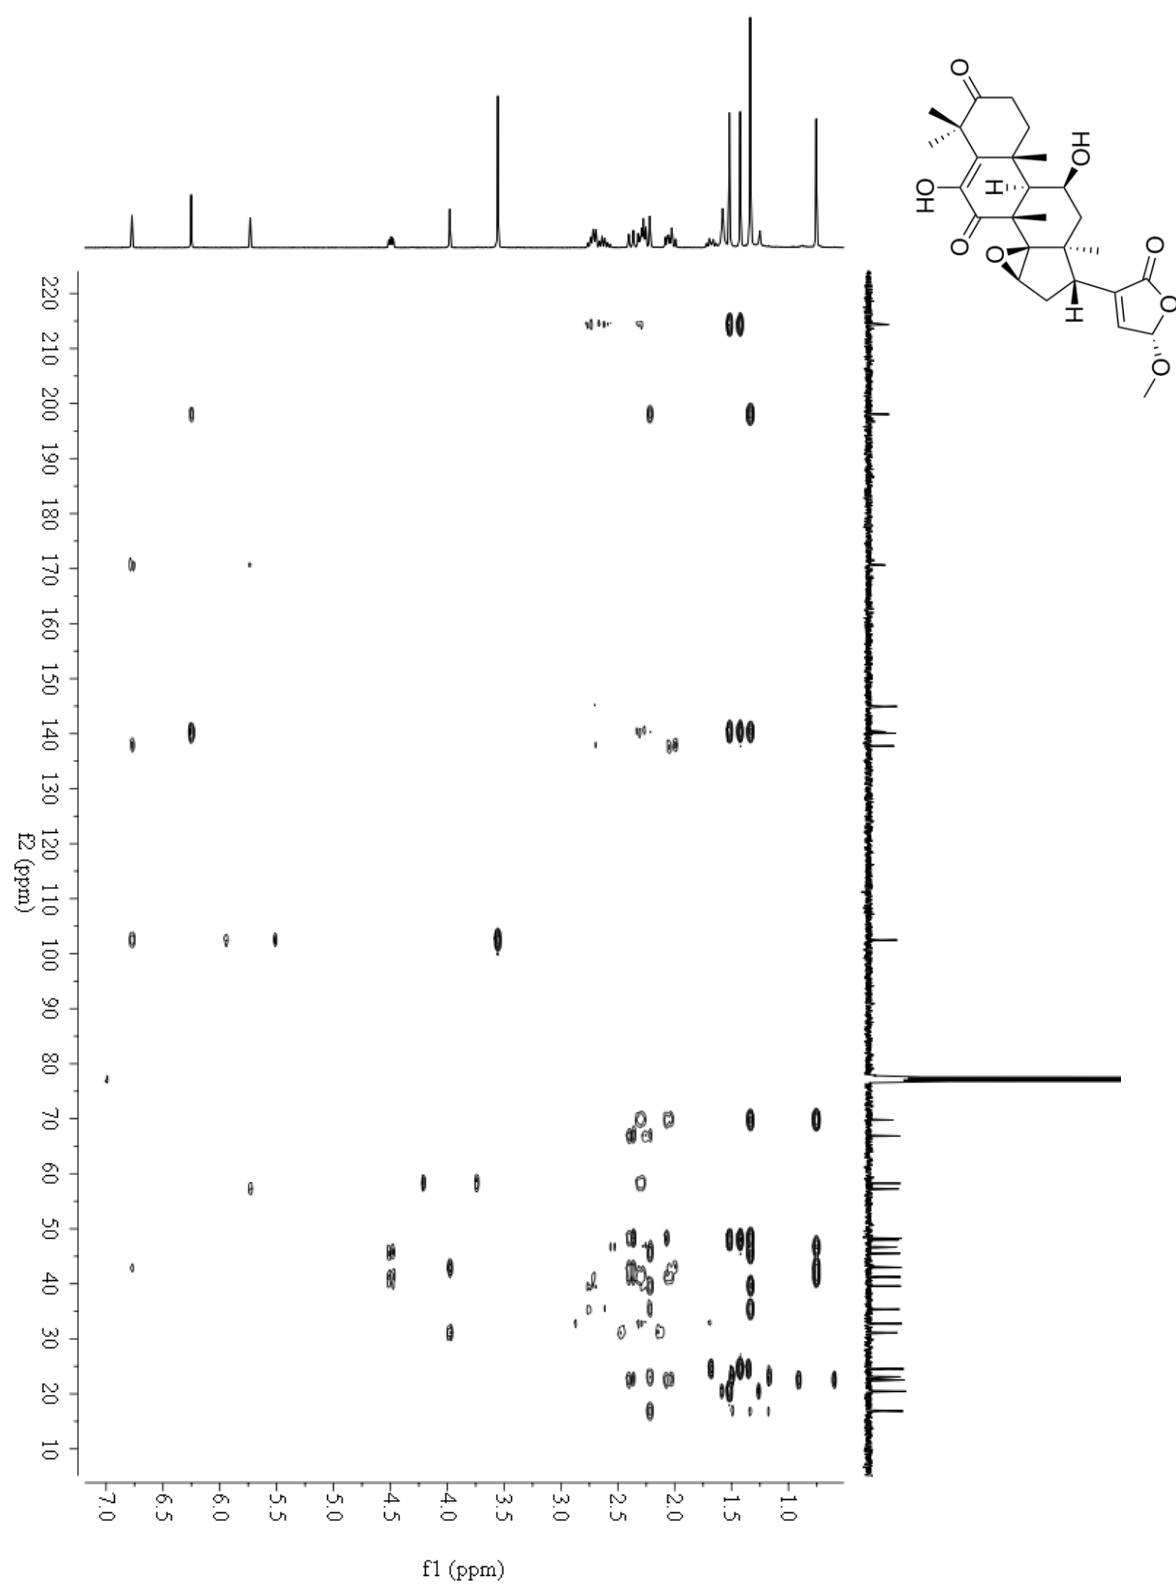

**Figure S35.** NOESY spectrum of walsunoid D (**4**) in CDCl<sub>3</sub>

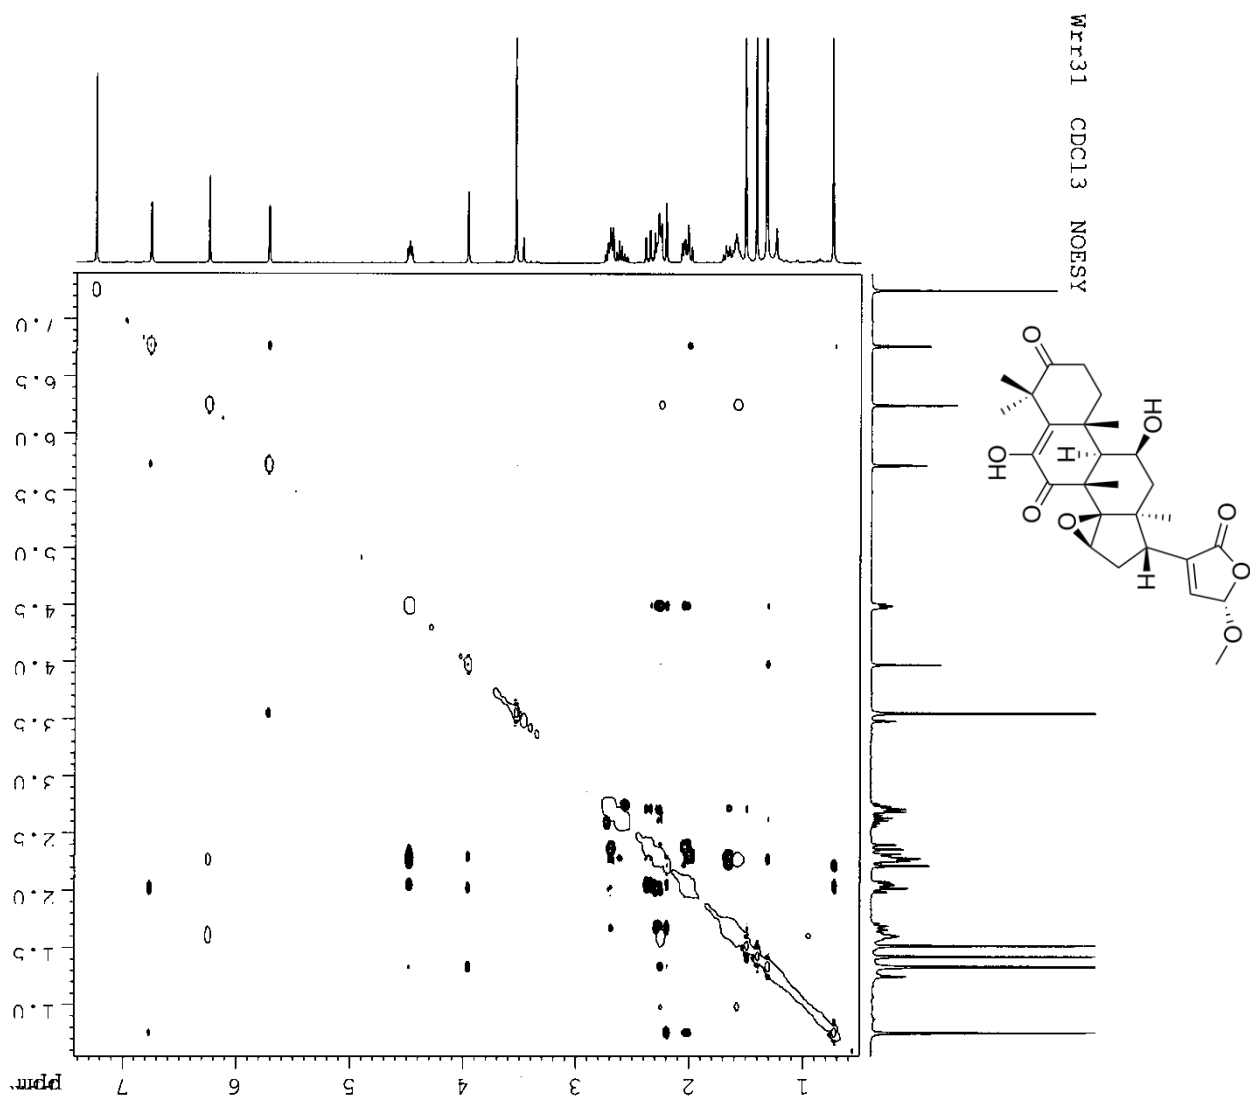

```

Current Data Parameters
NAME          Wtr31
EXPNO         19
PROCNO        1

F2 - Acquisition Parameters
Date_         20140318
Time          10.56
INSTRUM       spect
PROBHD        5 mm PABUL 13C
PULPROG       noesyphpp
TD            2048
SOLVENT       CDCl3
NS            4
DS            16
SWH           6393.862 Hz
FIDRES        3.12503 Hz
AQ            0.1602036 sec
RG            35.6
DM            78.200 usec
DE            6.50 usec
TE            296.9 K
D0            0.00006600 sec
D1            1.00000000 sec
D8            0.60000002 sec
DECI          0.00000000 sec
D12           0.0002000 sec
INO           0.00015620 sec

===== CHANNEL f1 =====
NUC1          1H
P1            9.50 usec
PL1           2500.00 usec
PLW1          25.00000000 W
PLW10         3.33759999 W
SFO1          400.1328009 MHz

F1 - Acquisition parameters
TD            320
SFO1          400.1328 MHz
FIDRES        20.006580 Hz
SW            16.000 ppm
FMODE         States-TPPI

F2 - Processing parameters
SI            1024
SF            400.130097 MHz
WDW           Q5SINC
SSB           0.65
GB            0
PC            1.00

F1 - Processing parameters
SI            1024
MC2           States-TPPI
SF            400.1300071 MHz
WDW           States-TPPI
SSB           2
GB            0
PC            0 Hz
  
```

Figure S36. (+)-ESIMS spectrum of walsunoid D (4)

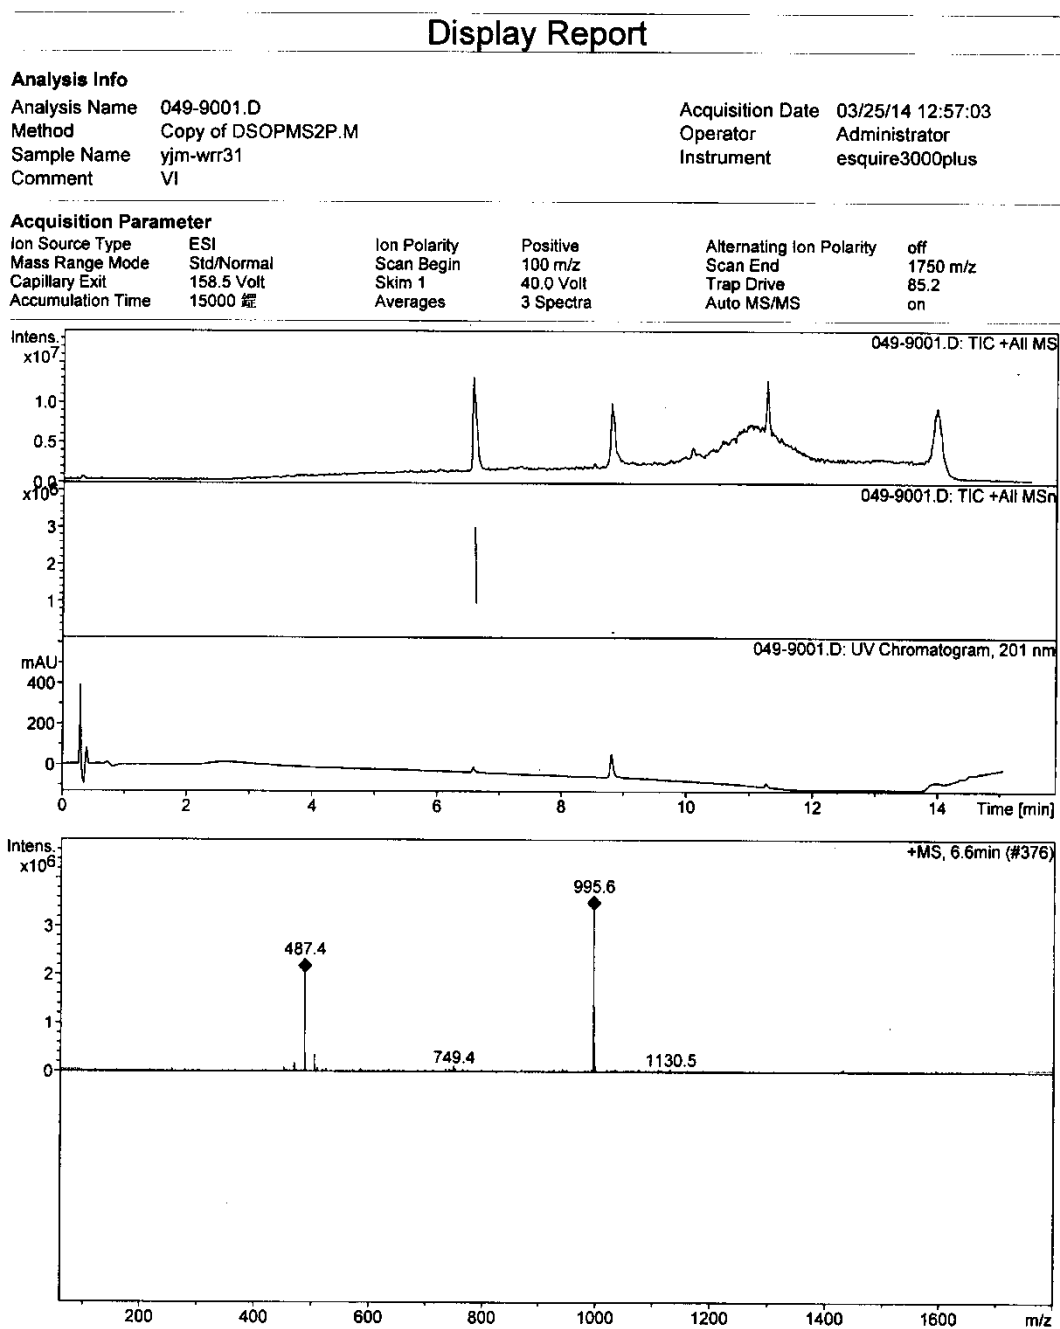

Figure S37. (-)-ESIMS spectrum of walsunoid D (4)

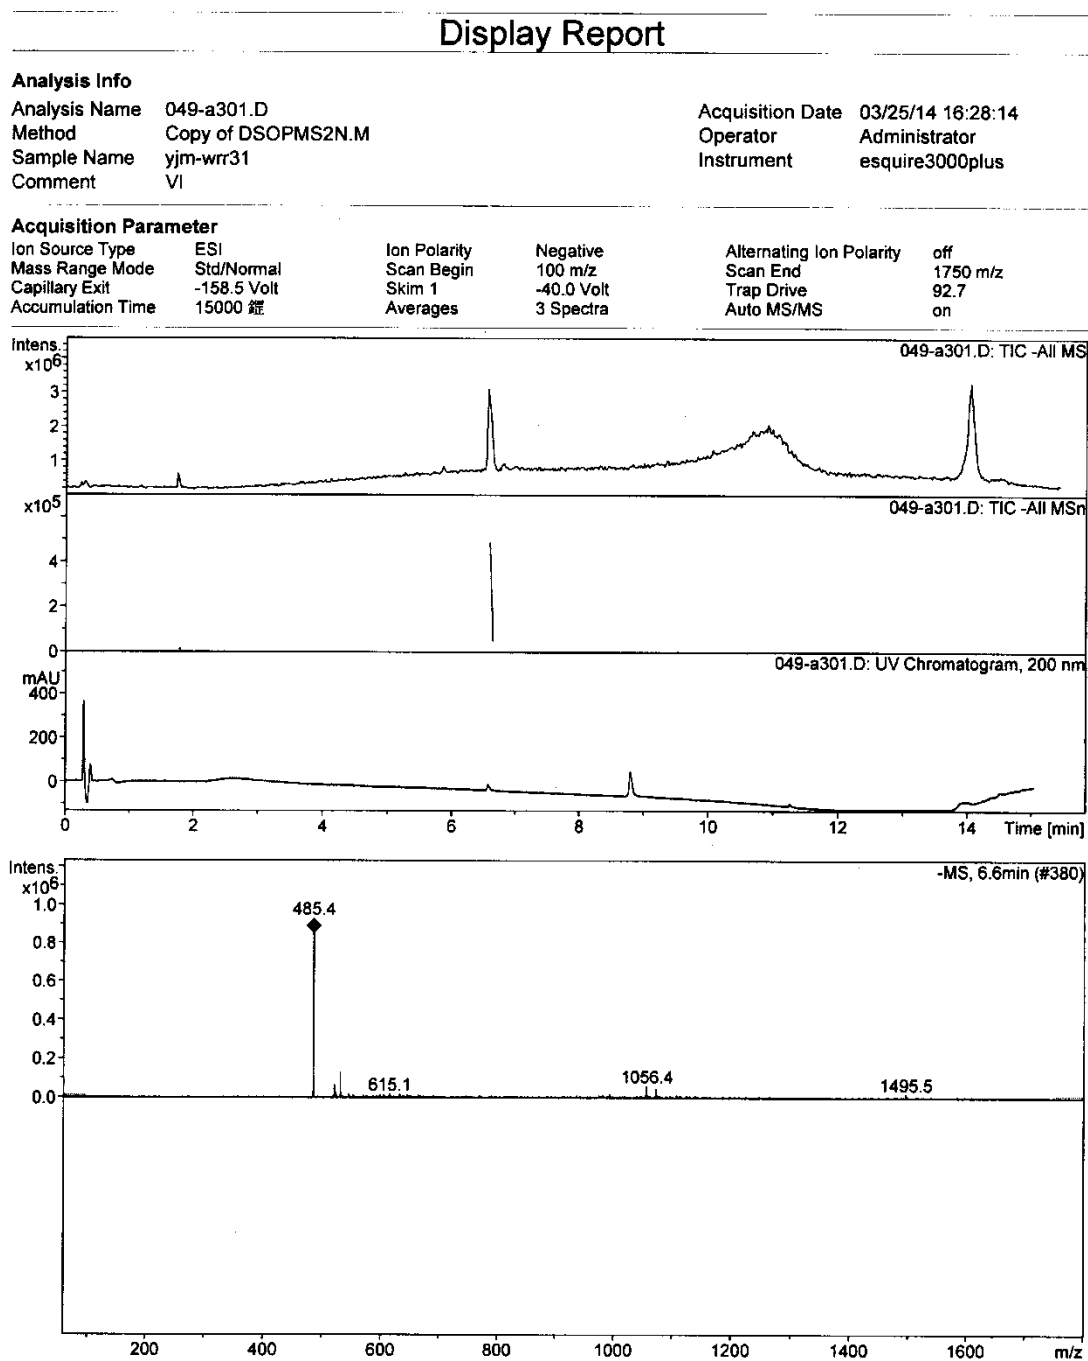

**Figure S38. (+)-HRESIMS spectrum of walsunoid D (4)**

**Elemental Composition Report**

Page 1

**Single Mass Analysis**

Tolerance = 5.0 PPM / DBE: min = -1.5, max = 50.0

Element prediction: Off

Number of isotope peaks used for i-FIT = 3

Monoisotopic Mass, Even Electron Ions

406 formula(e) evaluated with 4 results within limits (up to 50 closest results for each mass)

Elements Used:

C: 5-80 H: 2-120 O: 0-20 Na: 0-1

wrr31

LCT PXE KE324

03-Apr-2014

16:53:07

1: TOF MS ES+

7.87e+003

wrr31\_0403 49 (1.078) AM2 (Ar,10000.0,0.00,1.00); ABS; Cm (49:62)

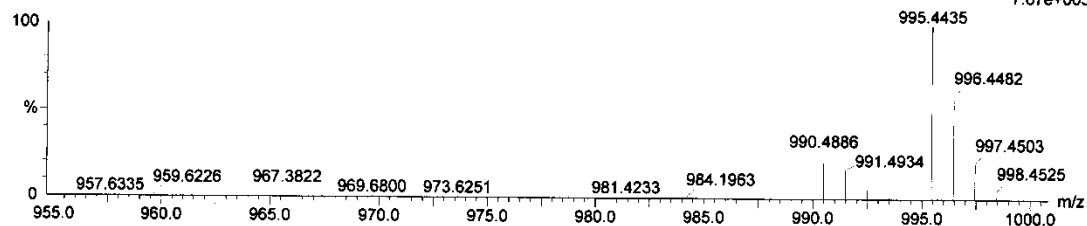

Minimum:

Maximum: 5.0 5.0 -1.5

Maximum: 5.0 5.0 50.0

| Mass     | Calc. Mass | mDa  | PPM  | DBE  | i-FIT | i-FIT (Norm) | Formula        |
|----------|------------|------|------|------|-------|--------------|----------------|
| 995.4435 | 995.4440   | -0.5 | -0.5 | 42.5 | 62.8  | 7.1          | C72 H60 O3 Na  |
|          | 995.4429   | 0.6  | 0.6  | 23.5 | 57.1  | 1.4          | C56 H67 O16    |
|          | 995.4464   | -2.9 | -2.9 | 45.5 | 64.1  | 8.4          | C74 H59 O3     |
|          | 995.4405   | 3.0  | 3.0  | 20.5 | 55.9  | 0.3          | C54 H68 O16 Na |



**Figure S39.** IR spectrum of walsunoid D (4)

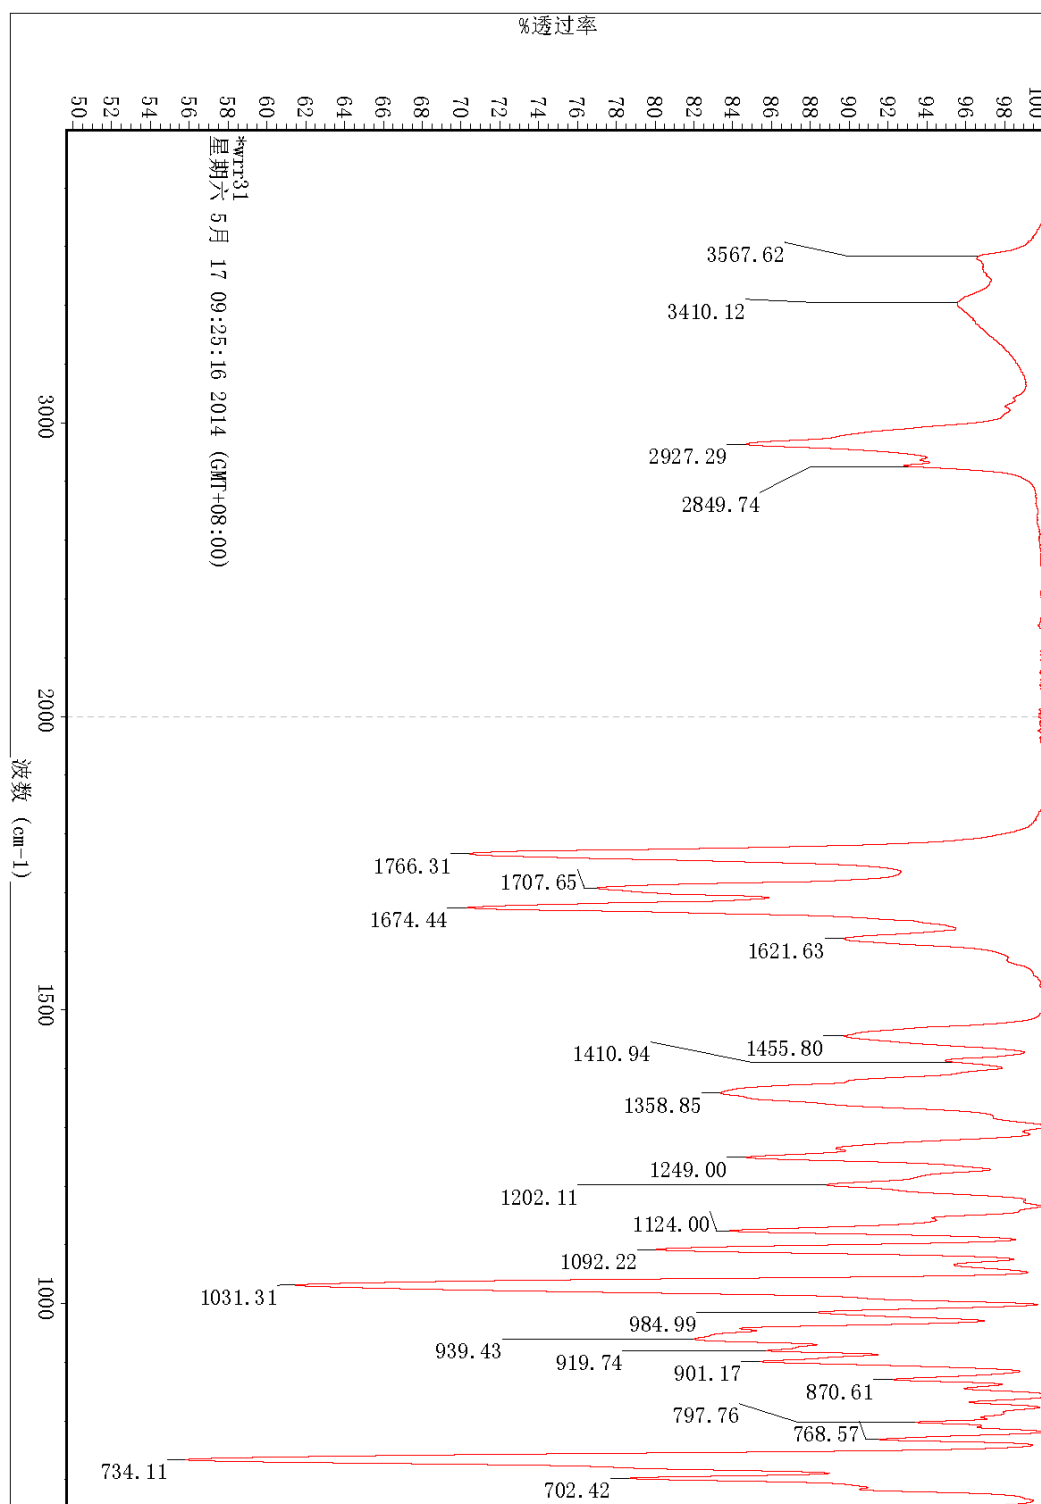

Chemical structure of **1** is shown above the spectrum. The <sup>13</sup>C NMR spectrum (CDCl<sub>3</sub>) displays peaks from 439.63 to 912.70 ppm. Key peaks are labeled with their chemical shifts (ppm): 912.70, 857.23, 808.24, 805.13, 804.09, 800.66, 751.85, 750.21, 439.63, 4273.85, 4272.10, 4270.38, 4268.67, 3752.65, 2904.02, 2902.30, 2900.60, 2898.12, 2896.36, 2895.62, 2893.89, 2698.14, 2695.53, 2390.90, 2105.30, 1640.72, 1639.56, 1631.33, 1630.10, 1621.90, 1620.68, 1582.81, 1581.56, 1572.62, 1454.34, 1438.53, 1392.38, 1391.18, 1385.34, 1384.25, 1382.59, 1381.29, 1378.84, 1377.78, 1375.68, 1368.83, 1366.61, 1336.46, 1253.36, 1252.44, 1250.71, 1244.20, 1242.32, 1241.46, 1239.74, 1238.80, 1234.91, 1228.63, 1227.80, 912.70, 857.23, 808.24, 805.13, 804.09, 800.66, 751.85, 750.21, 439.63.

**Figure S41.**  $^{13}\text{C}$  NMR spectrum of e walsunoid E (**5**) in  $\text{CDCl}_3$

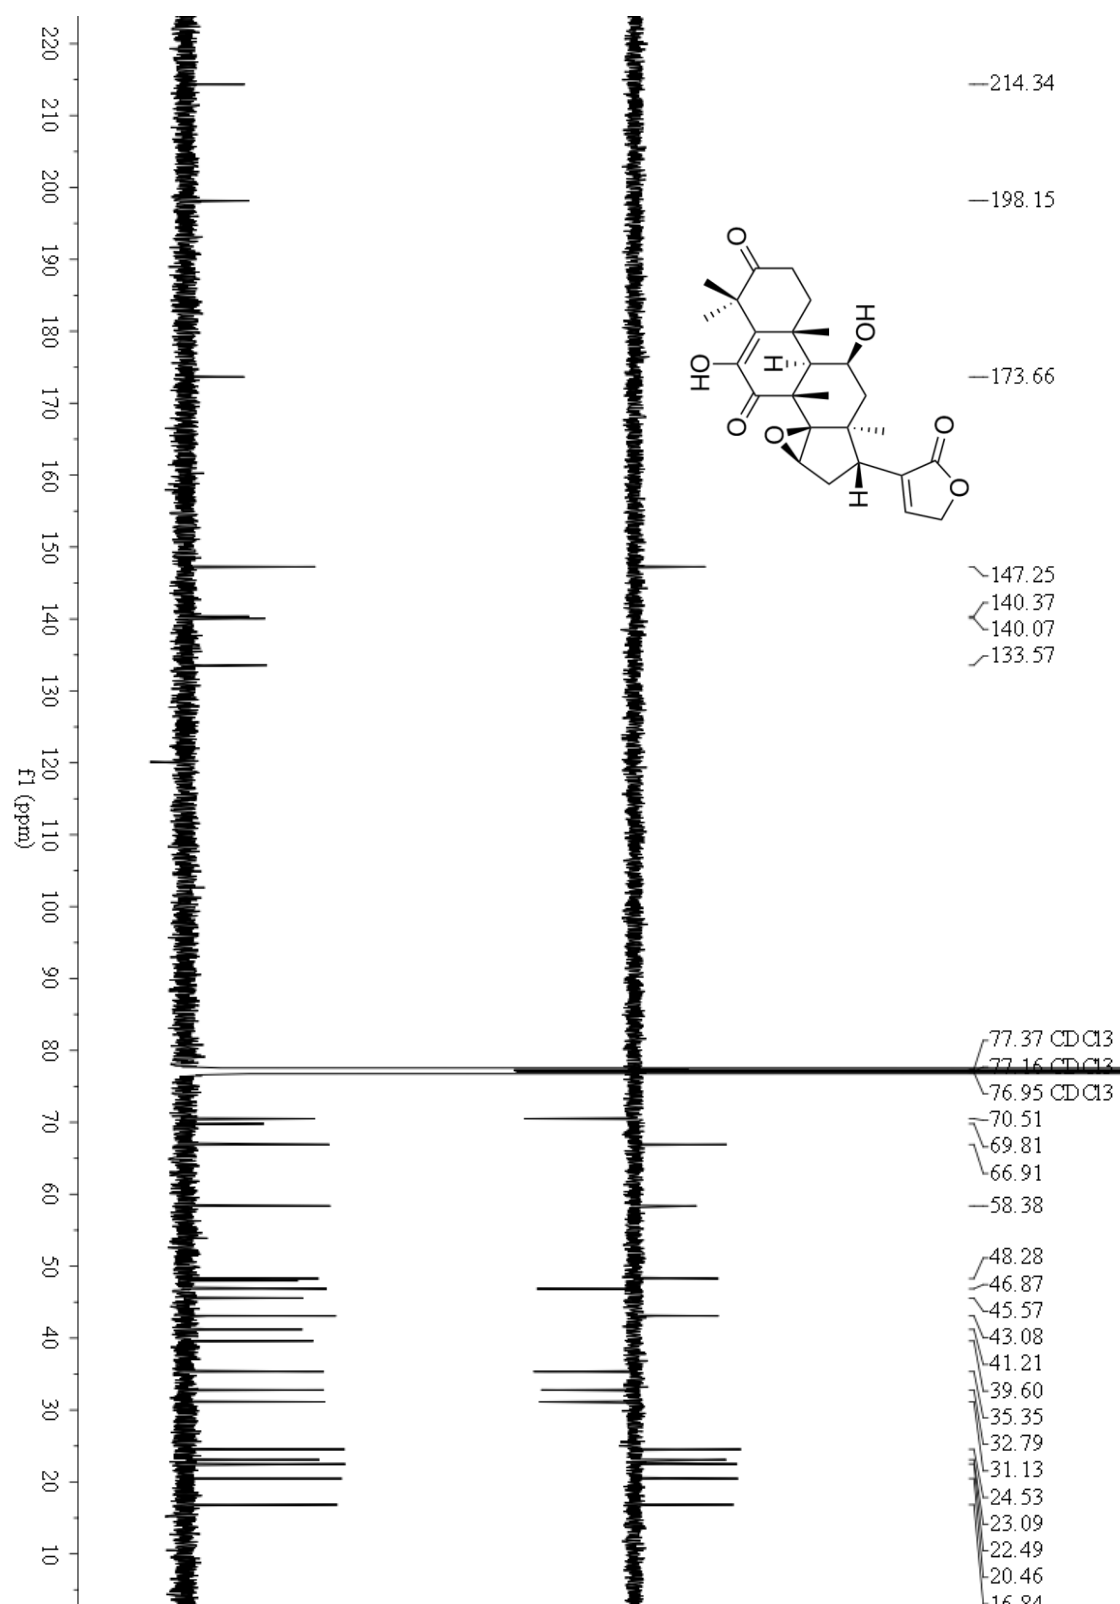

**Figure S42.** HSQC spectrum of walsunoid E (**5**) in CDCl<sub>3</sub>

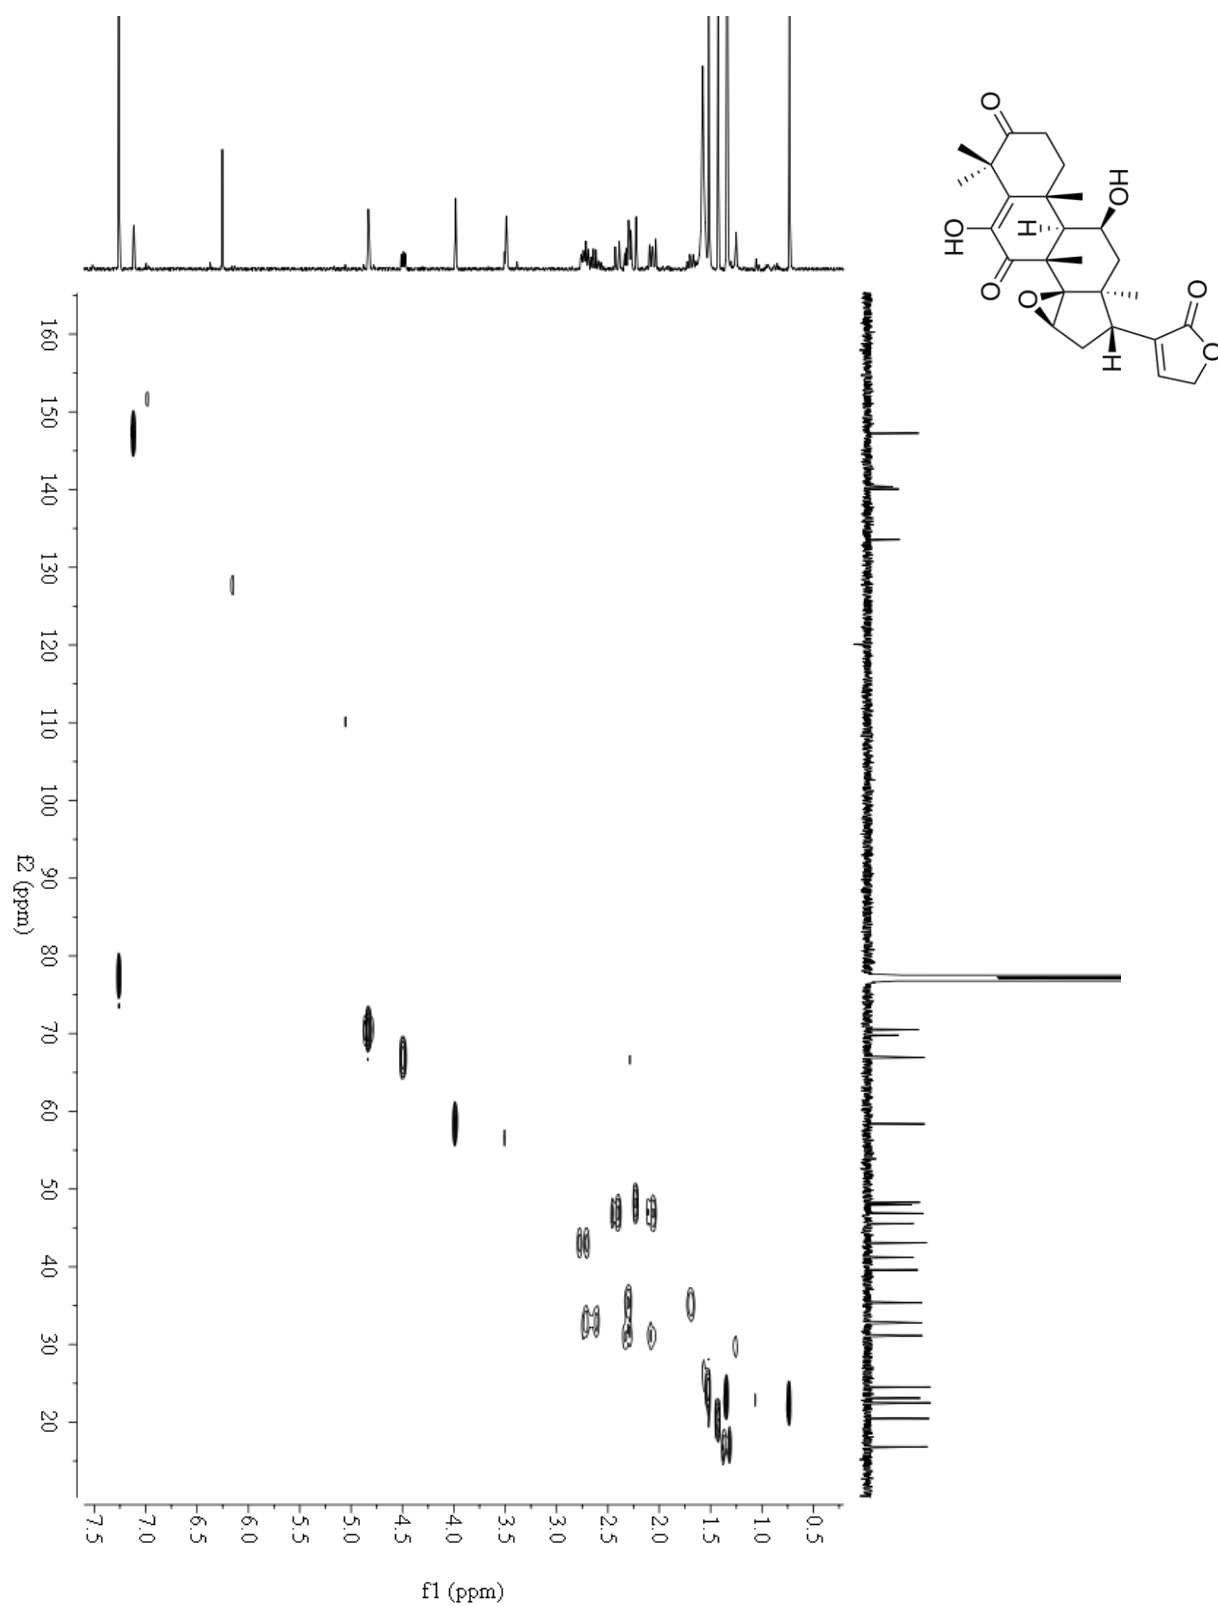

**Figure S43.** HMBC spectrum of walsunoid E (**5**) in CDCl<sub>3</sub>

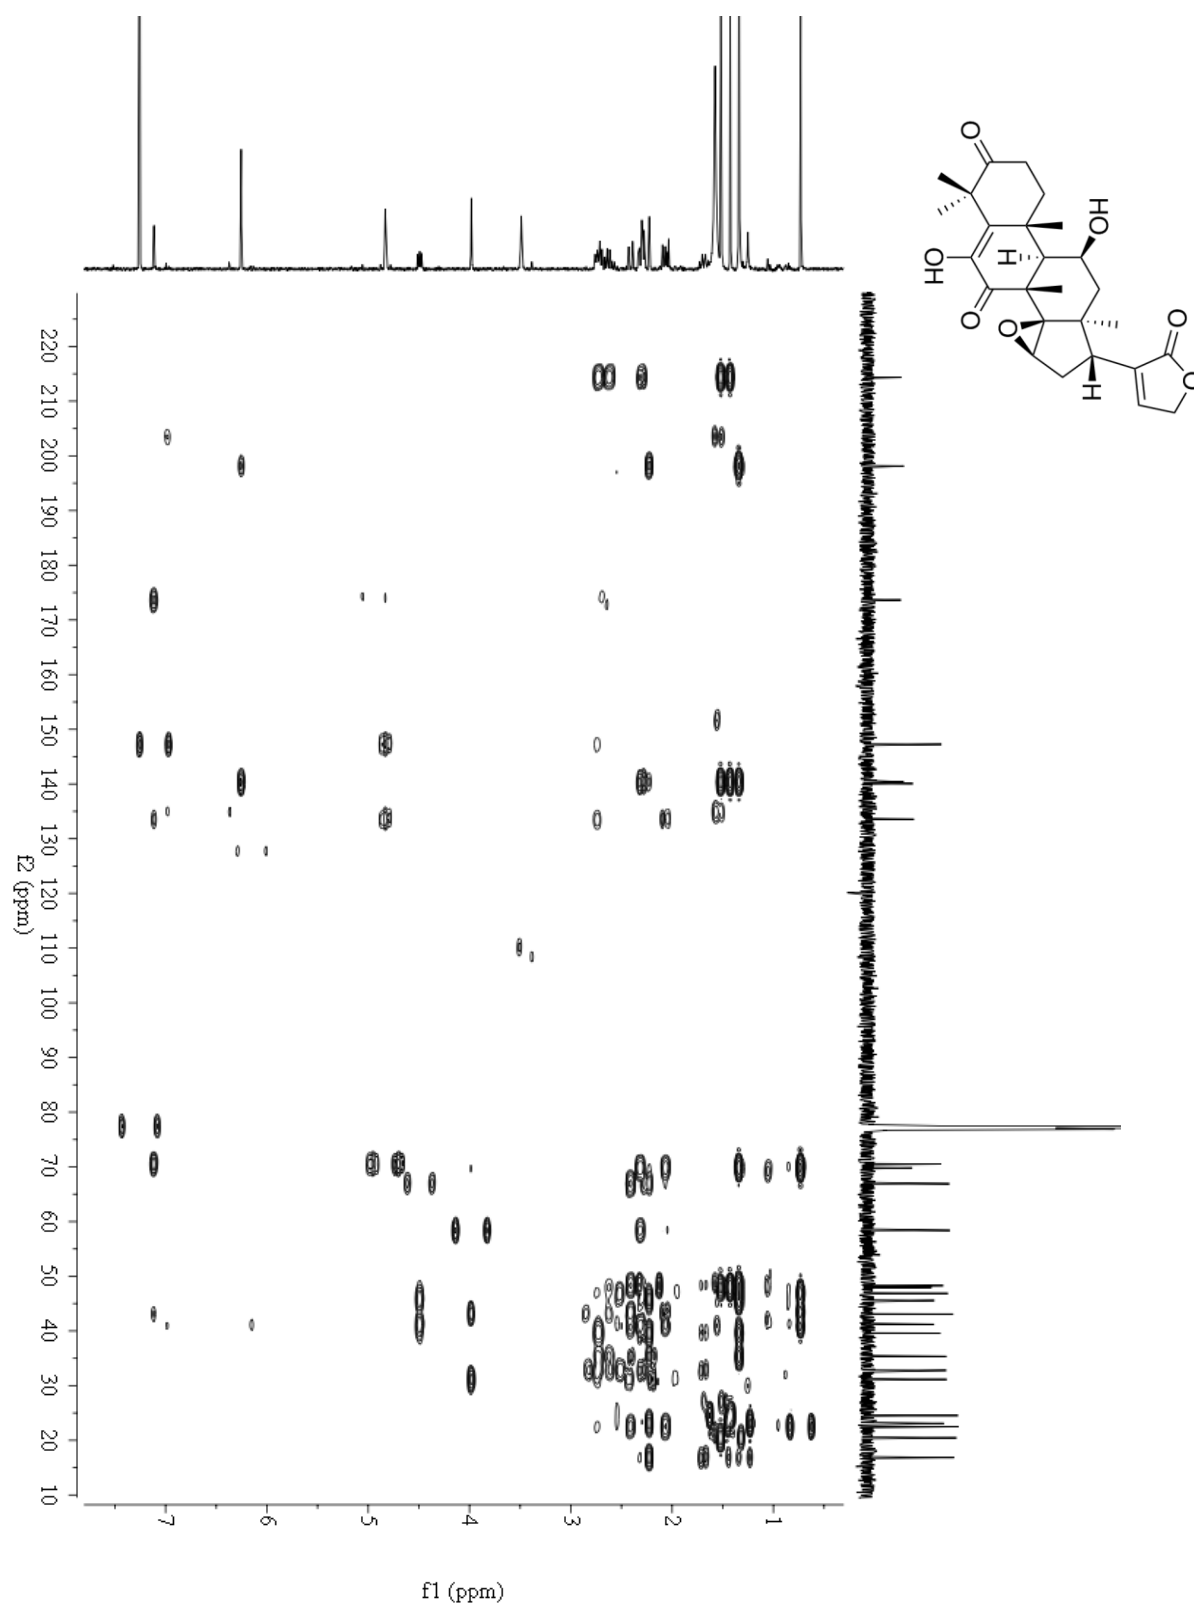

**Figure S44.** (+)-ESIMS spectrum of walsunoid E (5)

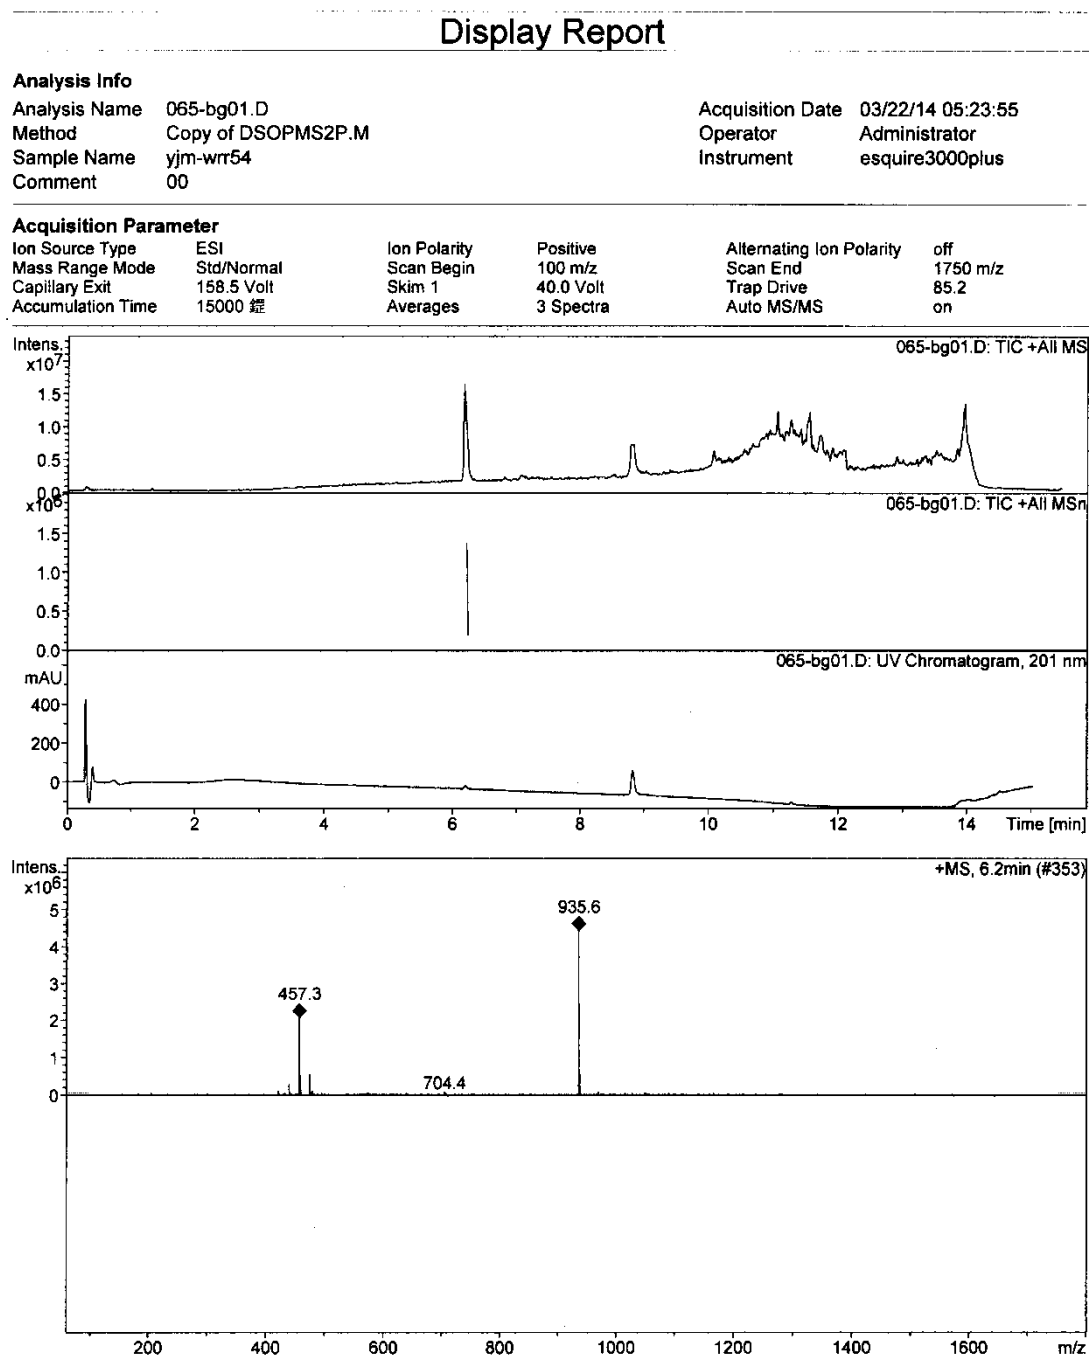

**Figure S45. (-)-ESIMS spectrum of walsunoid E (5)**

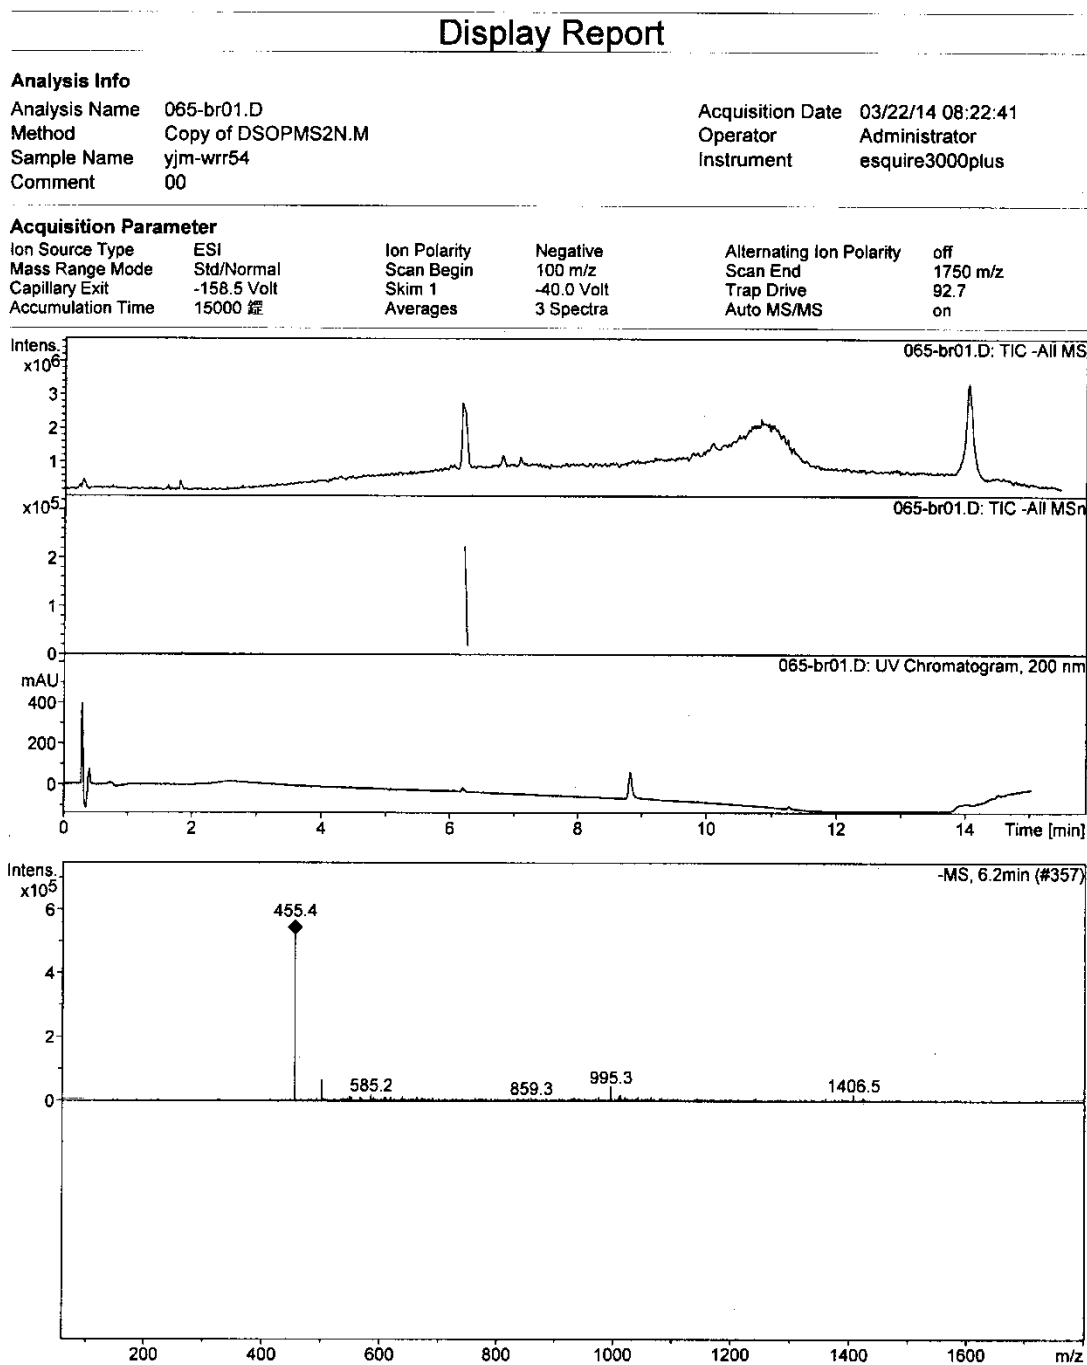

**Figure S46.** (+)-HRESIMS spectrum of walsunoid E (5)

**Elemental Composition Report**

**Page 1**

Tolerance = 10.0 PPM / DBE: min = -1.5, max = 50.0

Isotope cluster parameters: Separation = 1.0 Abundance = 1.0%

Monoisotopic Mass, Odd and Even Electron Ions

10 formula(e) evaluated with 1 results within limits (up to 20 closest results for each mass)

SIMM-Mass Spec

Q-ToF Ultima

06-May-2014 14:37:37

wrr54

140623 53 (1.000) AM (Cen, 5, 80.00, Ht. 9000.0, 362.93, 0.70); Sm (Mn, 2x0.00); Cm (53:65)

TOF MS ES+

1.06e3

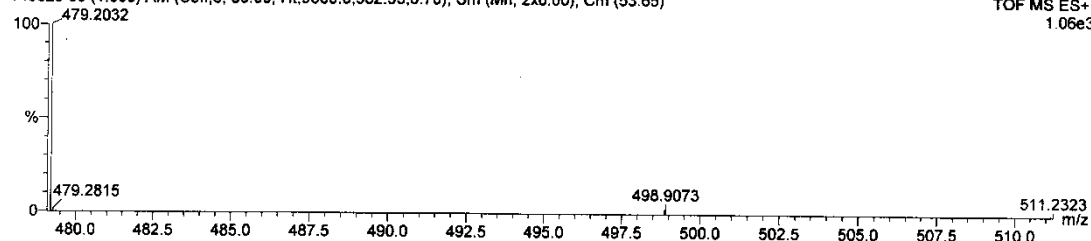

| Minimum: | 50.00  |            |       |      | -1.5 |       |               |
|----------|--------|------------|-------|------|------|-------|---------------|
| Maximum: | 100.00 |            | 200.0 | 10.0 | 50.0 |       |               |
| Mass     | RA     | Calc. Mass | mDa   | PPM  | DBE  | Score | Formula       |
| 479.2032 | 100.00 | 479.2046   | -1.4  | -2.9 | 10.5 | 1     | C26 H32 O7 Na |



**Figure S47.** IR spectrum of walsunoid E (5)

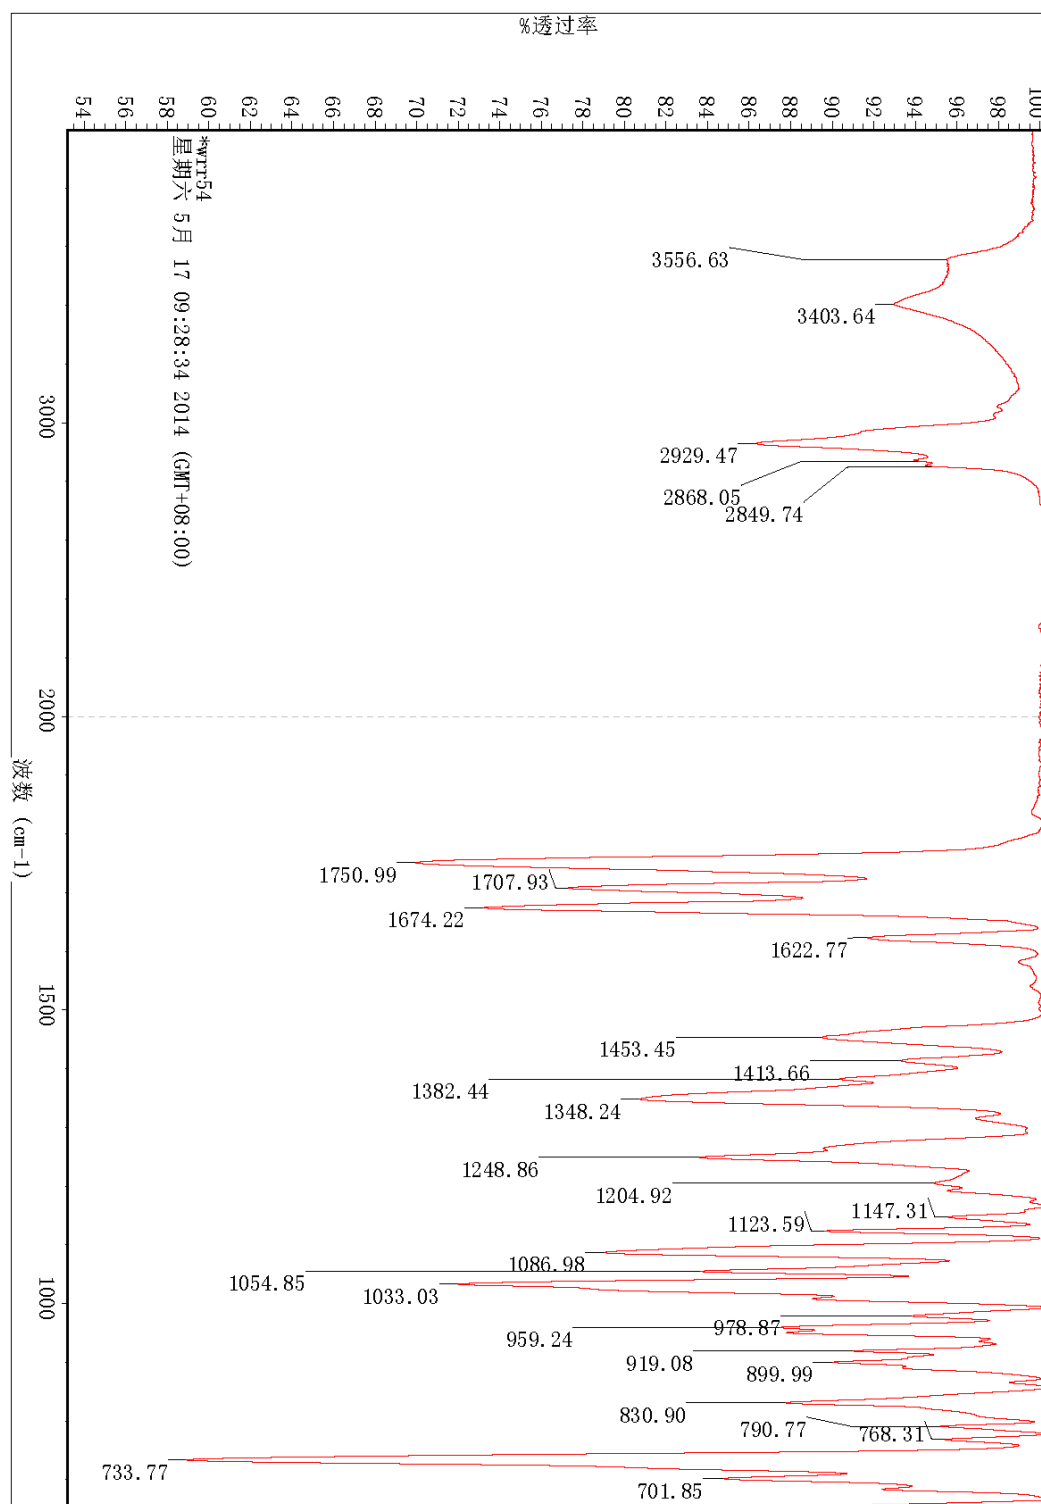

**Figure S48.**  $^1\text{H}$  NMR spectrum of walsunoid F (**6**) in  $\text{C}_5\text{D}_5\text{N}$

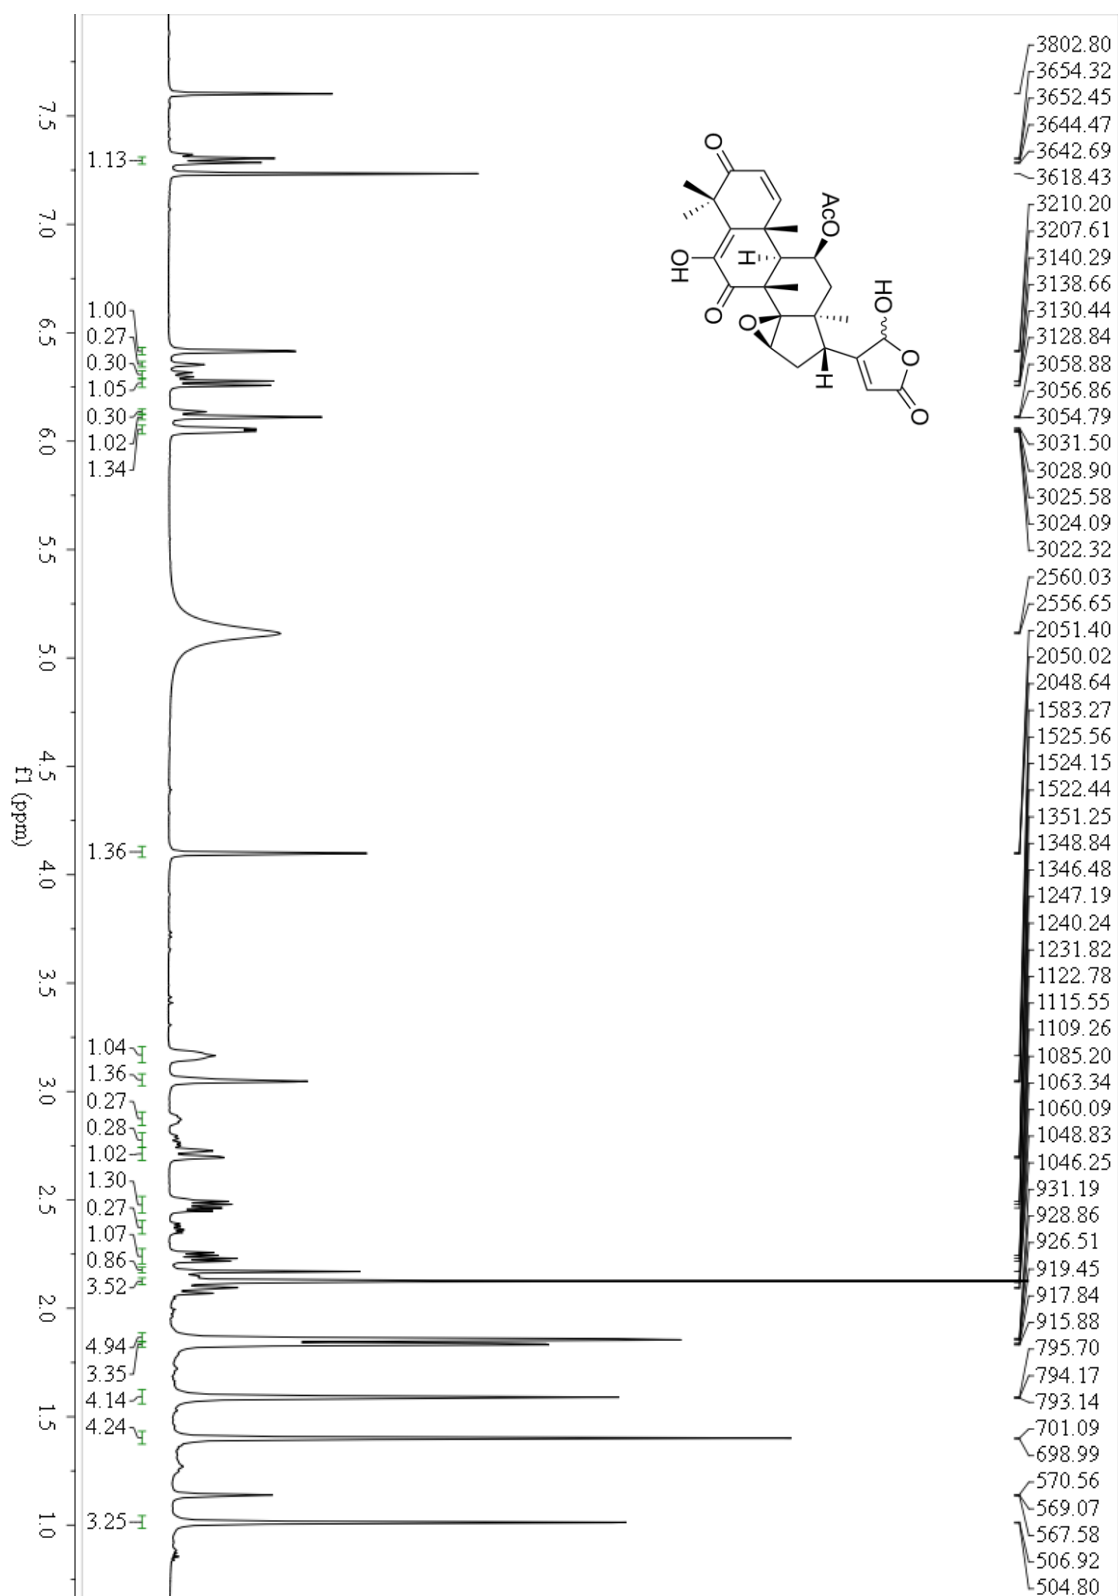

**Figure S49.**  $^{13}\text{C}$  NMR spectrum of walsunoid F (**6**) in  $\text{C}_5\text{D}_5\text{N}$

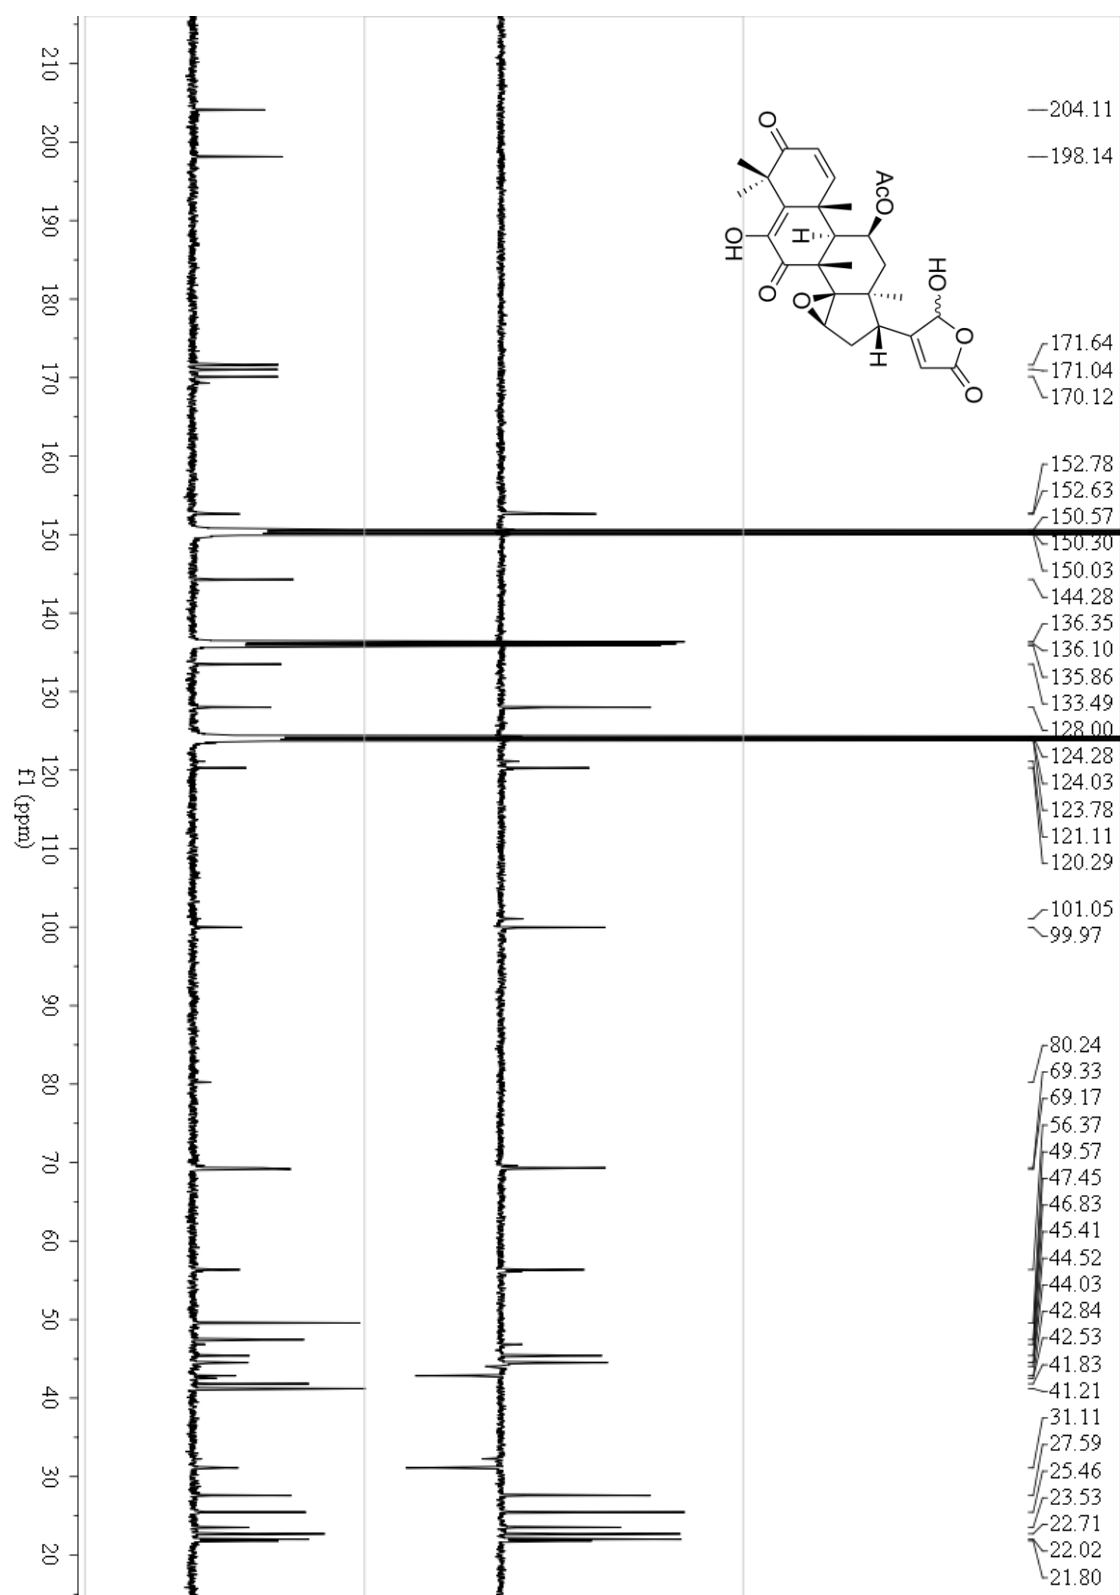

**Figure S50.** HSQC spectrum of walsunoid F (**6**) in C<sub>5</sub>D<sub>5</sub>N

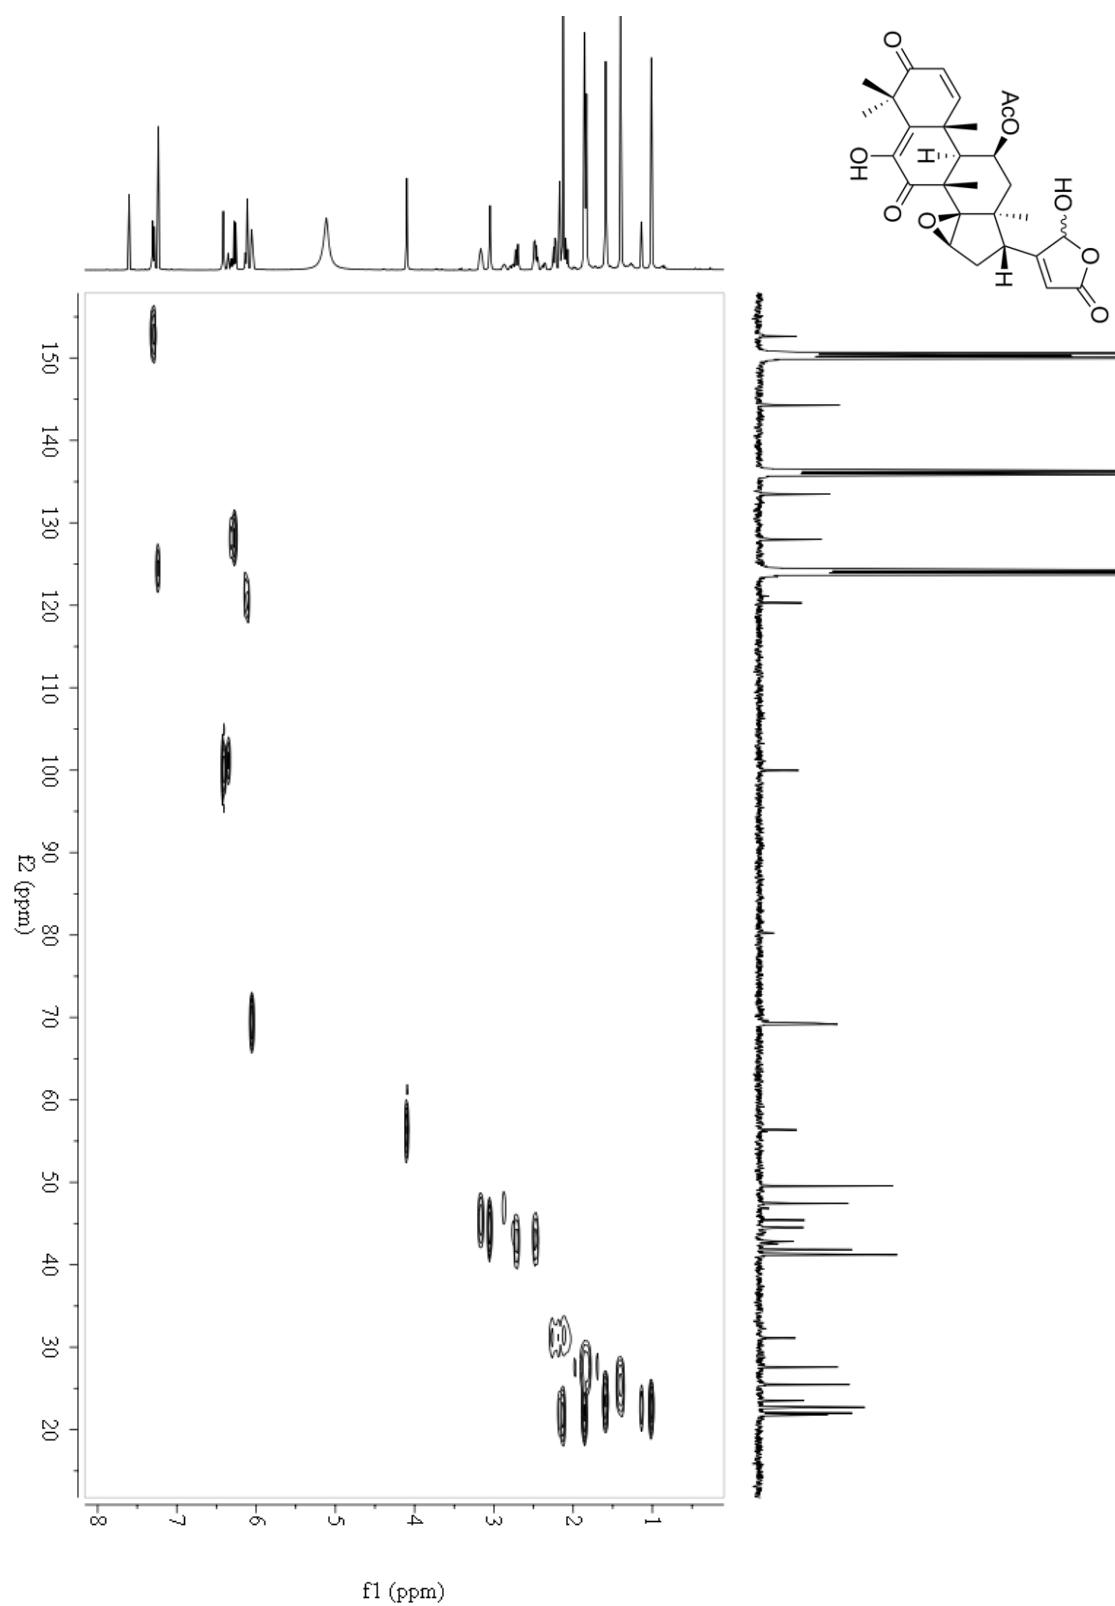

**Figure S51.** HMBC spectrum of walsunoid d F (**6**) in  $C_5D_5N$

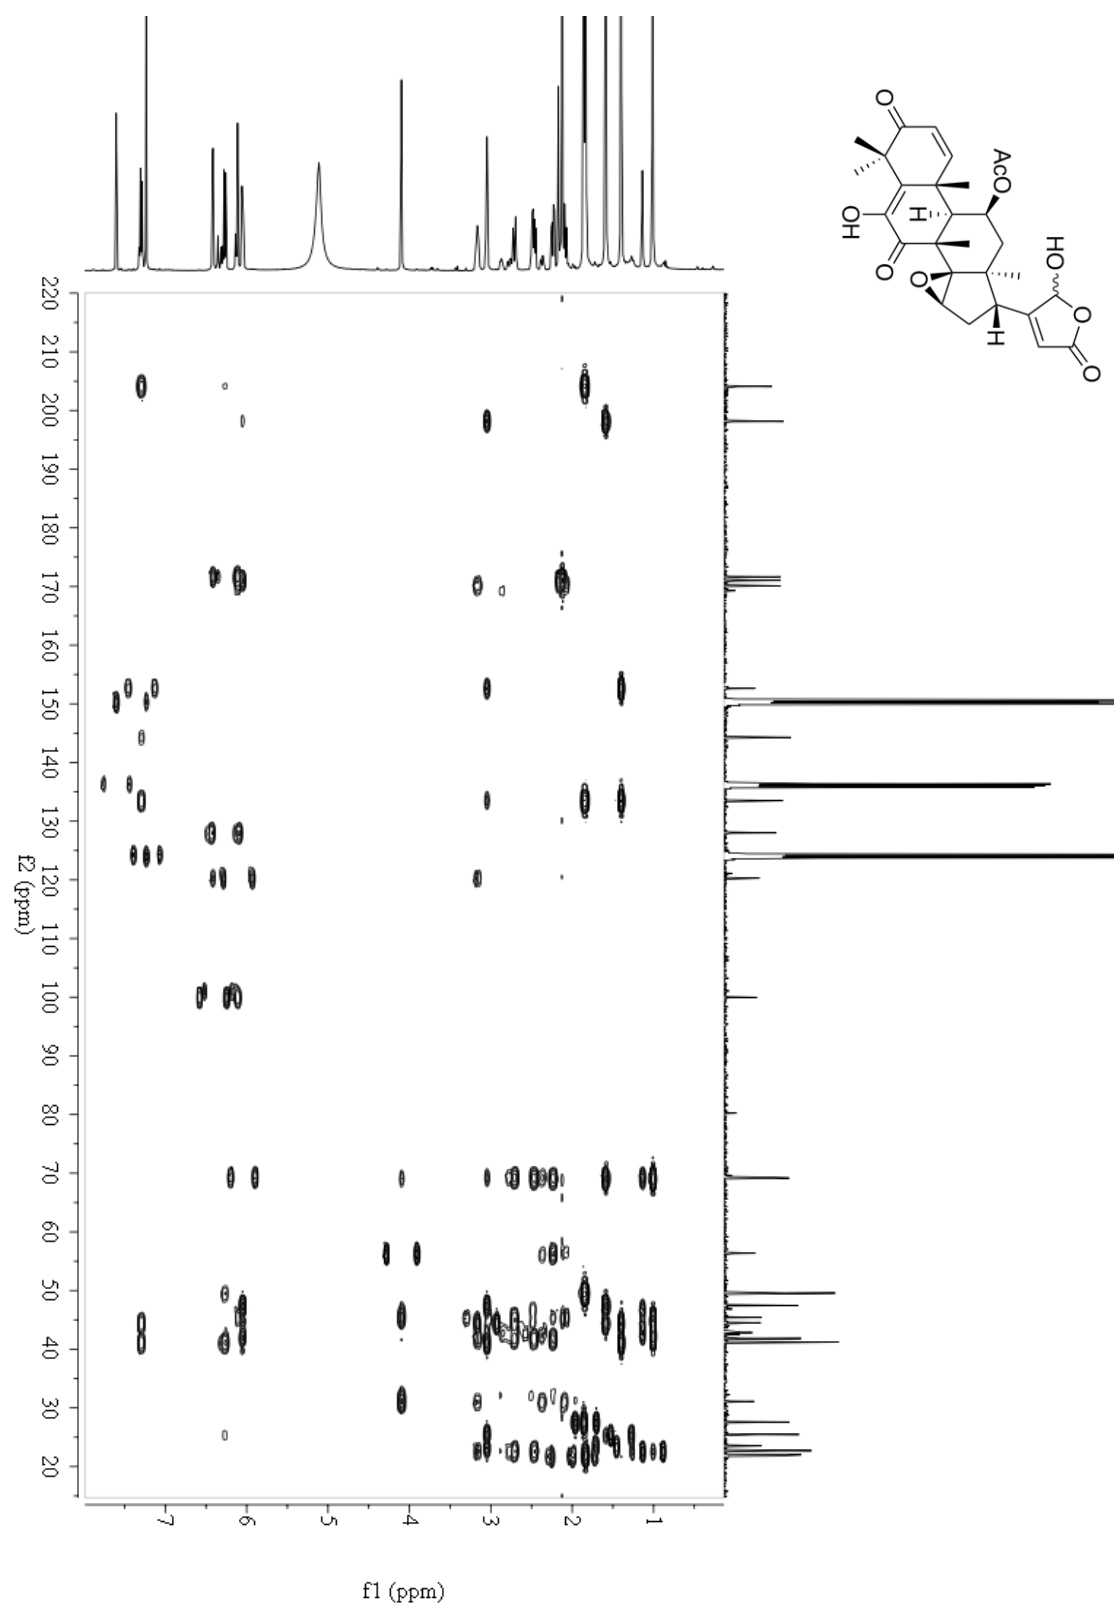

Figure S52. NOESY spectrum of walsunoid F (6) in C<sub>5</sub>D<sub>5</sub>N

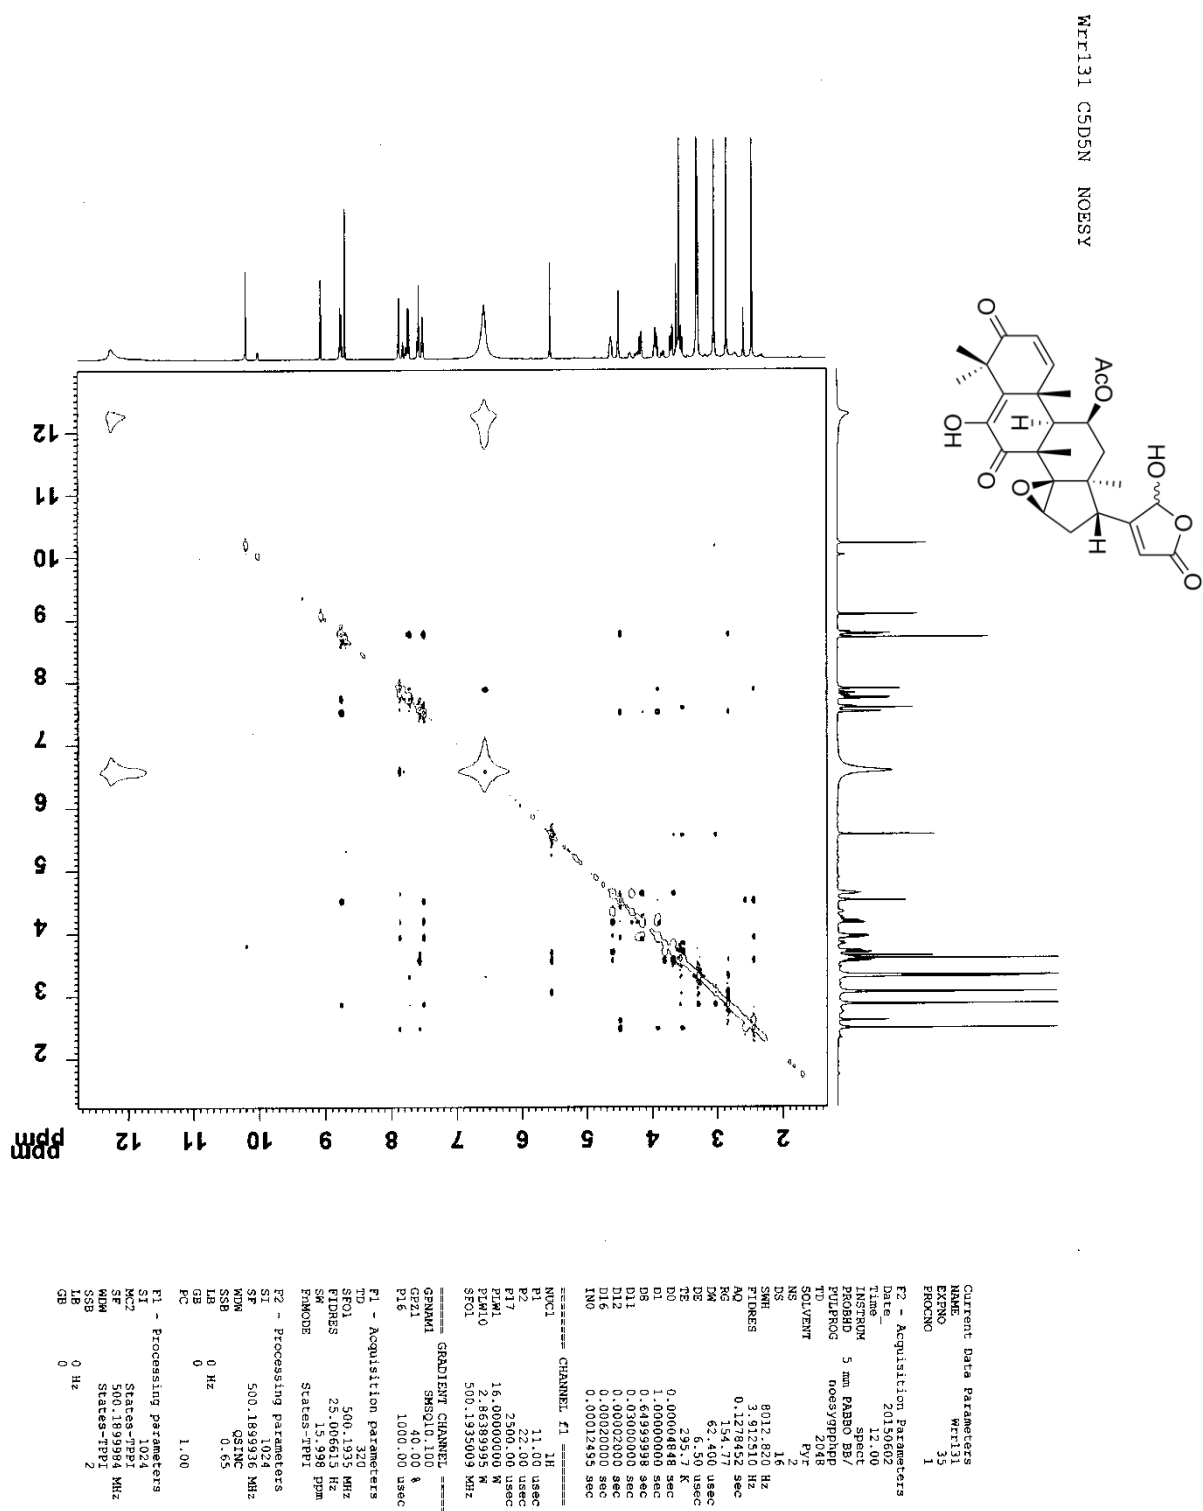

Figure S53. (+)-ESIMS spectrum of walsunoid F (6)

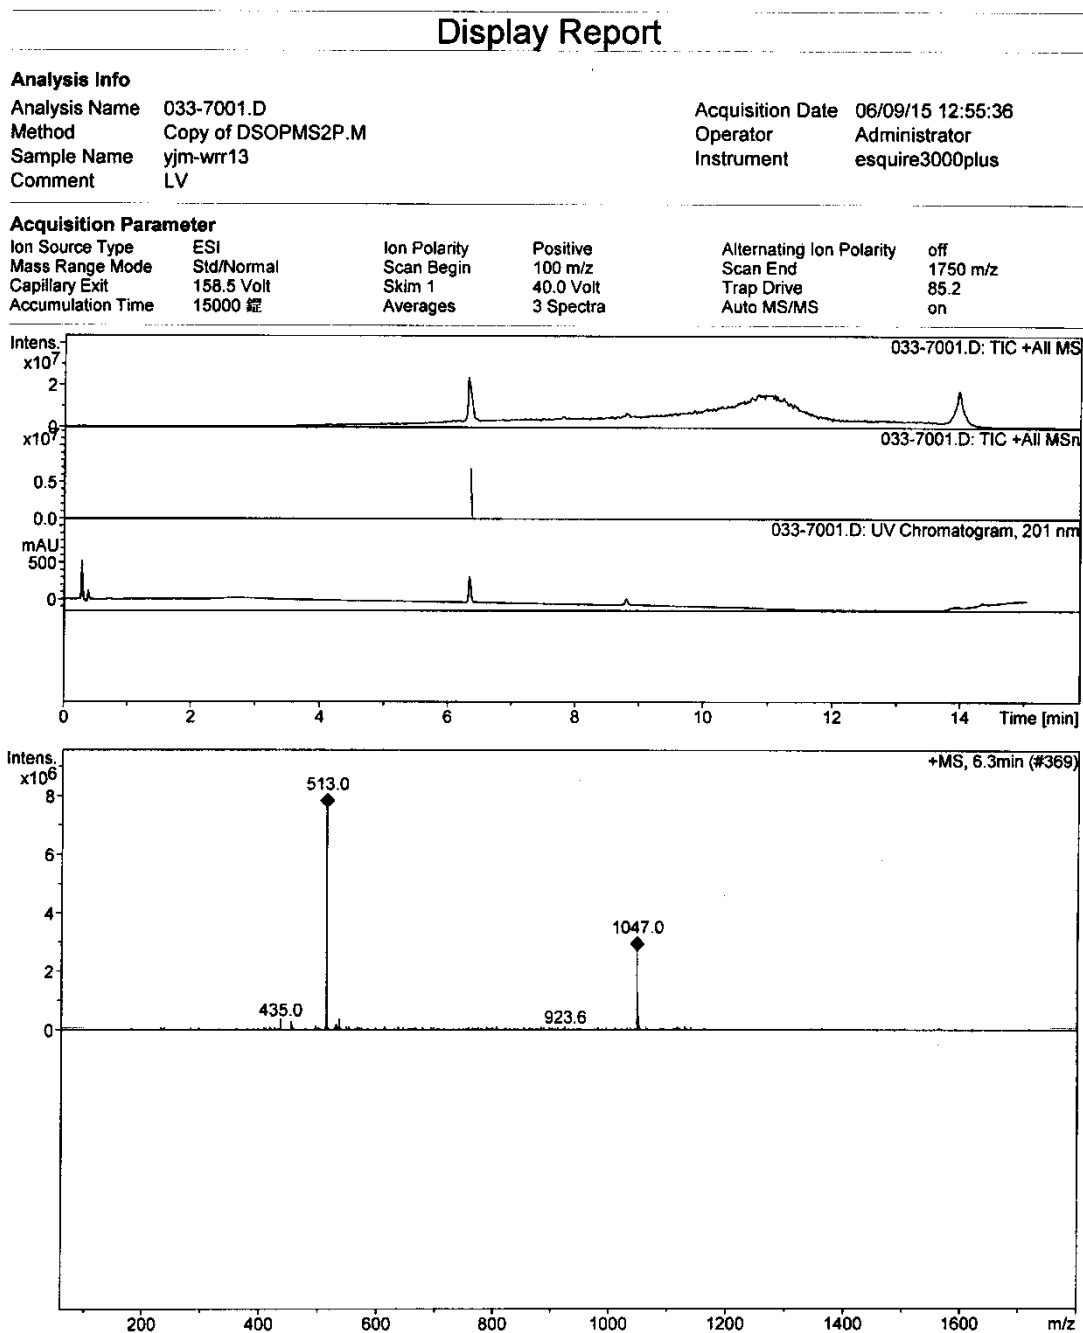

**Figure S54.** (–)-ESIMS spectrum of walsunoid F (**6**)

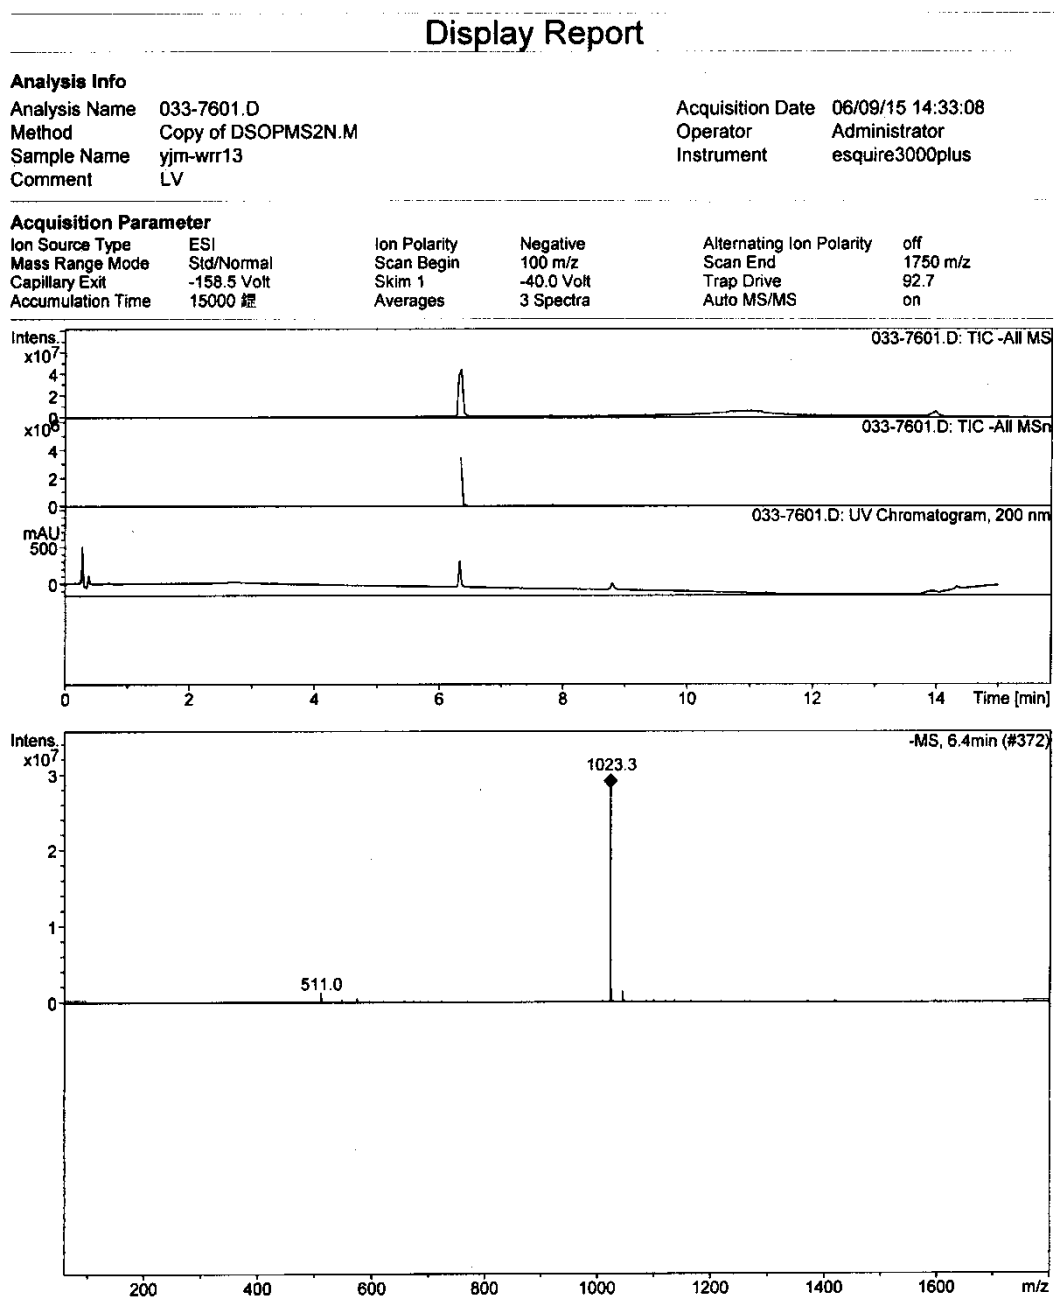



**Figure S55. (-)-HRESIMS spectrum of walsunoid F (6)**

**Elemental Composition Report**

**Page 1**

**Single Mass Analysis**

Tolerance = 5.0 PPM / DBE: min = -1.5, max = 50.0

Element prediction: Off

Number of isotope peaks used for i-FIT = 3

Monoisotopic Mass, Even Electron Ions

104 formula(e) evaluated with 1 results within limits (up to 50 closest results for each mass)

Elements Used:

C: 5-80 H: 2-120 O: 0-20

wrr13

LCT PXE KE324

11-Jun-2015

13:56:02

1: TOF MS ES-

5.17e+003

wrr13\_20150611 12 (0.230) AM2 (Ar,10000.0,0.00,1.00); ABS; Cm (10:17)

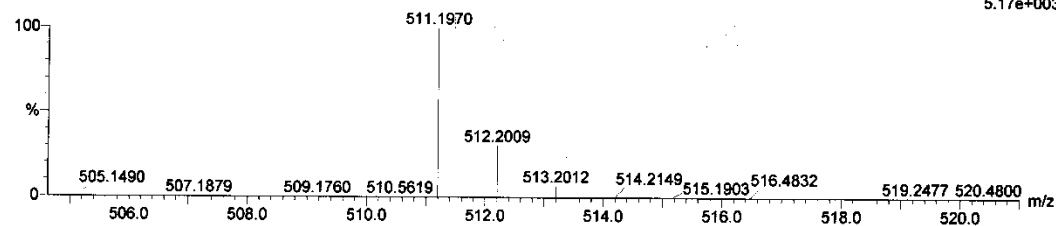

|          |            |     |     |      |       |              |            |
|----------|------------|-----|-----|------|-------|--------------|------------|
| Minimum: |            |     |     | -1.5 |       |              |            |
| Maximum: |            |     |     | 50.0 |       |              |            |
| Mass     | Calc. Mass | mDa | PPM | DBE  | i-FIT | i-FIT (Norm) | Formula    |
| 511.1970 | 511.1968   | 0.2 | 0.4 | 13.5 | 47.6  | 0.0          | C28 H31 O9 |

**Figure S56.** IR spectrum of walsunoid d F (6)

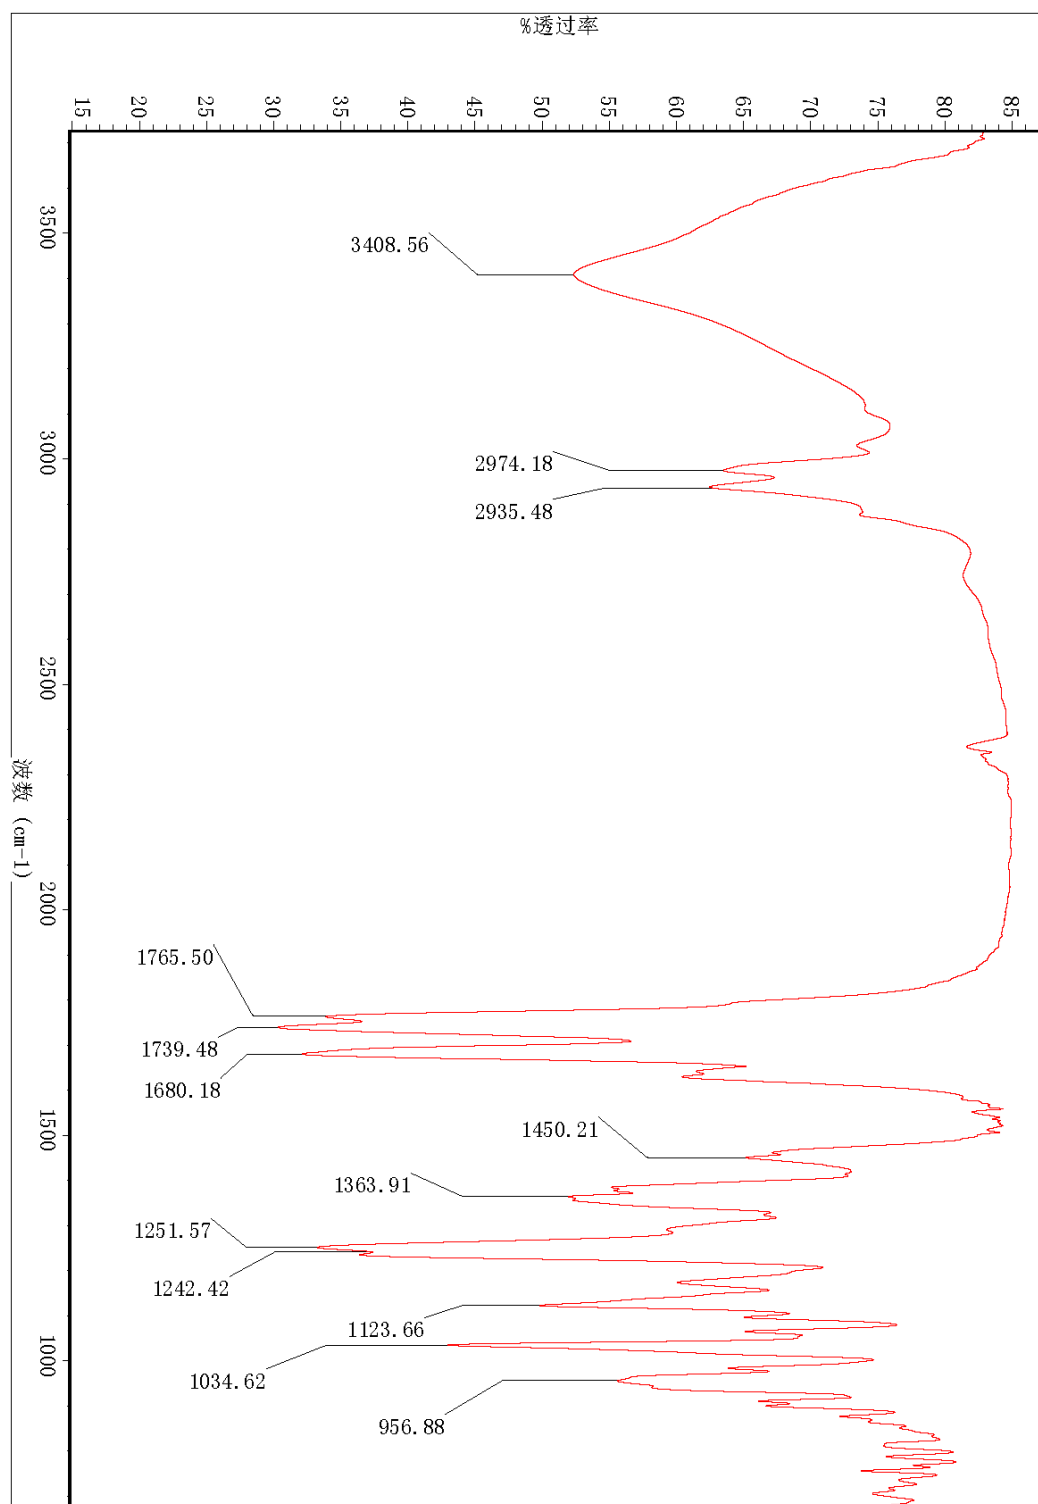

Chemical structure of **1** is shown. The <sup>1</sup>H NMR spectrum (400 MHz, CDCl<sub>3</sub>) displays peaks at δ 7.14 (s, 1H), 6.81 (s, 1H), 6.43 (s, 1H), 6.22 (s, 1H), 6.03 (s, 1H), 5.81 (s, 1H), 5.21 (s, 1H), 5.03 (s, 1H), 4.81 (s, 1H), 4.63 (s, 1H), 4.41 (s, 1H), 4.21 (s, 1H), 4.03 (s, 1H), 3.81 (s, 1H), 3.63 (s, 1H), 3.41 (s, 1H), 3.21 (s, 1H), 3.03 (s, 1H), 2.81 (s, 1H), 2.63 (s, 1H), 2.41 (s, 1H), 2.23 (s, 1H), 2.03 (s, 1H), 1.81 (s, 1H), 1.63 (s, 1H), 1.41 (s, 1H), 1.23 (s, 1H), 1.03 (s, 1H), and 0.81 (s, 1H). The <sup>13</sup>C NMR spectrum (100 MHz, CDCl<sub>3</sub>) displays peaks at δ 386.1, 381.3, 368.9, 366.5, 366.4, 350.7, 350.1, 303.2, 302.3, 301.8, 244.3, 190.3, 189.6, 189.3, 188.6, 169.4, 168.5, 167.5, 166.6, 163.1, 162.5, 160.2, 158.7, 157.6, 156.7, 155.7, 154.7, 147.5, 142.2, 141.5, 140.7, 140.0, 135.4, 134.5, 134.1, 133.4, 133.2, 132.7, 132.0, 129.5, 129.5, 128.7, 126.7, 125.4, 125.1, 124.1, 113.5, 112.6, 112.5, 112.2, 111.2, 109.2, 109.1, 104.7, 104.6, 103.9, 92.8, 71.4, 68.9, and 60.8 ppm.

**Figure S58.**  $^{13}\text{C}$  NMR spectrum of walsunoid G (**7**) in  $\text{C}_5\text{D}_5\text{N}$

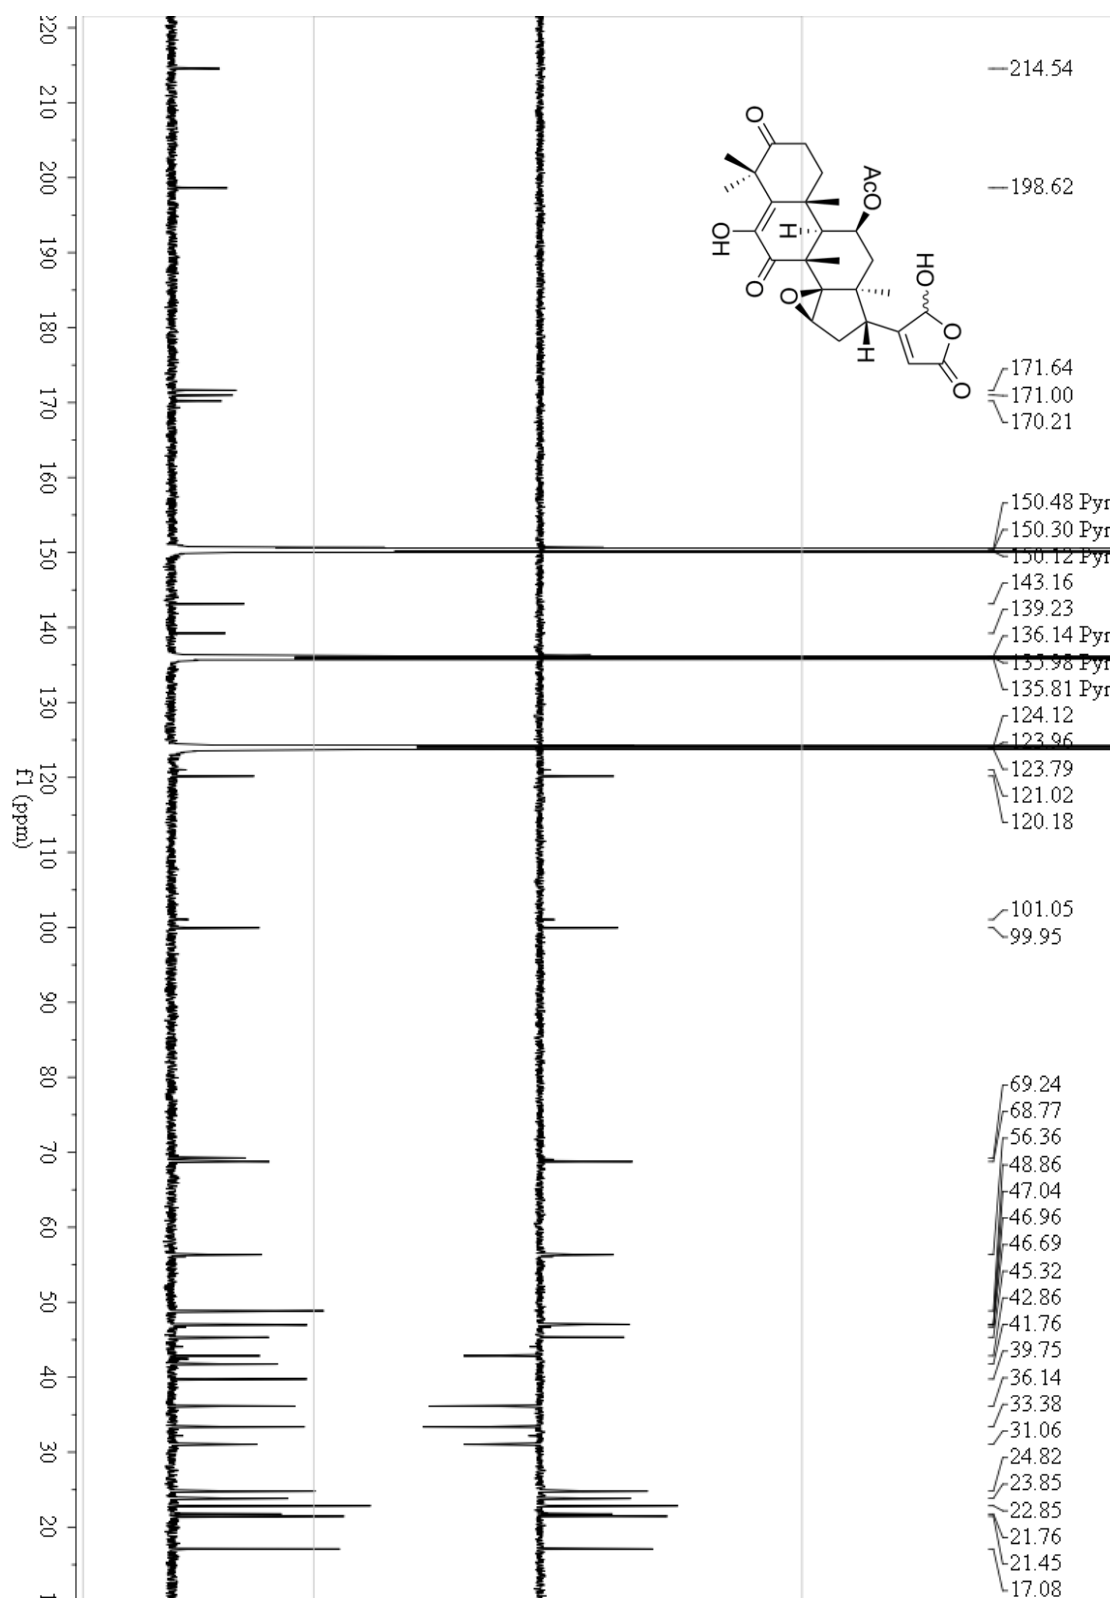

The figure displays the chemical structure of compound **1** and its corresponding <sup>1</sup>H and <sup>13</sup>C NMR spectra. The chemical structure is a complex polycyclic molecule featuring a central ring system with multiple methyl groups, a ketone, a hydroxyl group, and an acetate (AcO) group. A side chain includes a carboxylic acid group and a furan ring. The <sup>1</sup>H NMR spectrum (top) shows peaks in the aromatic region (6.5-7.5 ppm), a broad peak for the hydroxyl group (around 10 ppm), and several peaks in the aliphatic region (1.5-5.5 ppm). The <sup>13</sup>C NMR spectrum (bottom) shows peaks from 15 to 125 ppm, including carbonyl carbons (around 170-200 ppm) and various aliphatic carbons. The x-axis for the <sup>13</sup>C NMR spectrum is labeled 'f2 (ppm)' and ranges from 15 to 125. The y-axis for the <sup>1</sup>H NMR spectrum is labeled 'f1 (ppm)' and ranges from 1 to 7. The chemical structure is labeled with 'H' and 'AcO' groups.

**Figure S60.** HMBC spectrum of walsunoid G (**7**) in C<sub>5</sub>D<sub>5</sub>N

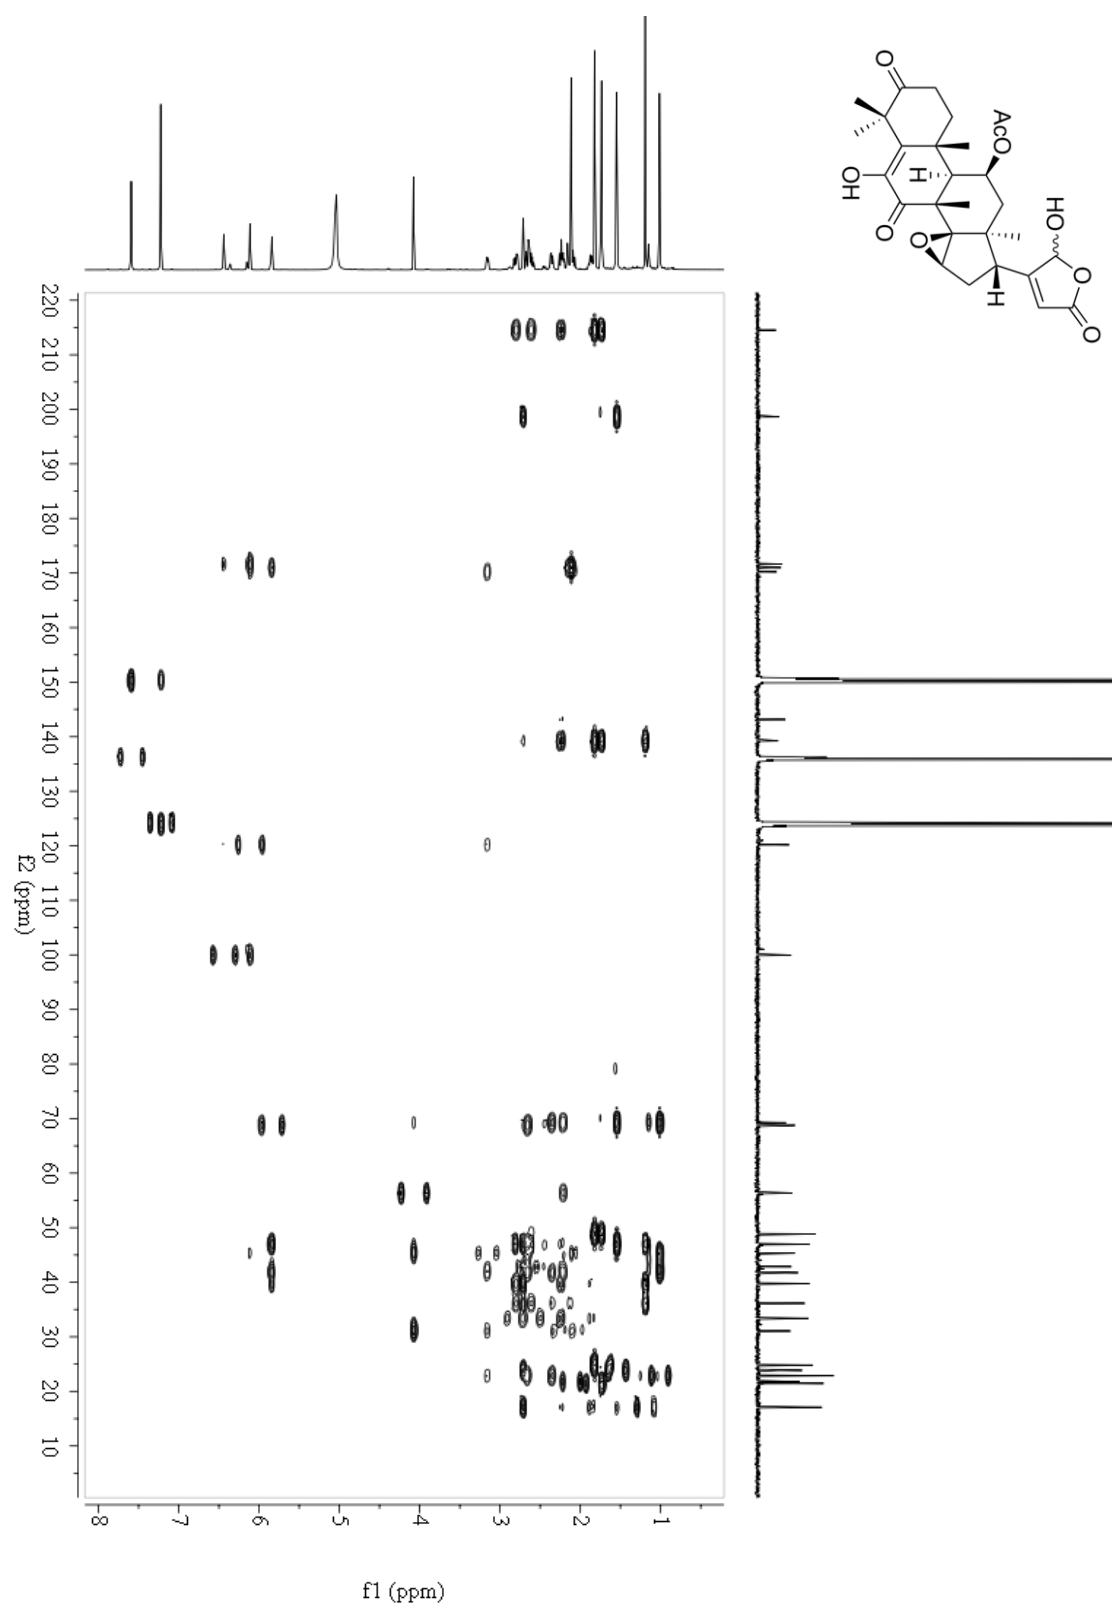

**Figure S61.** NOESY spectrum of walsunoid G (**7**) in C<sub>5</sub>D<sub>5</sub>N

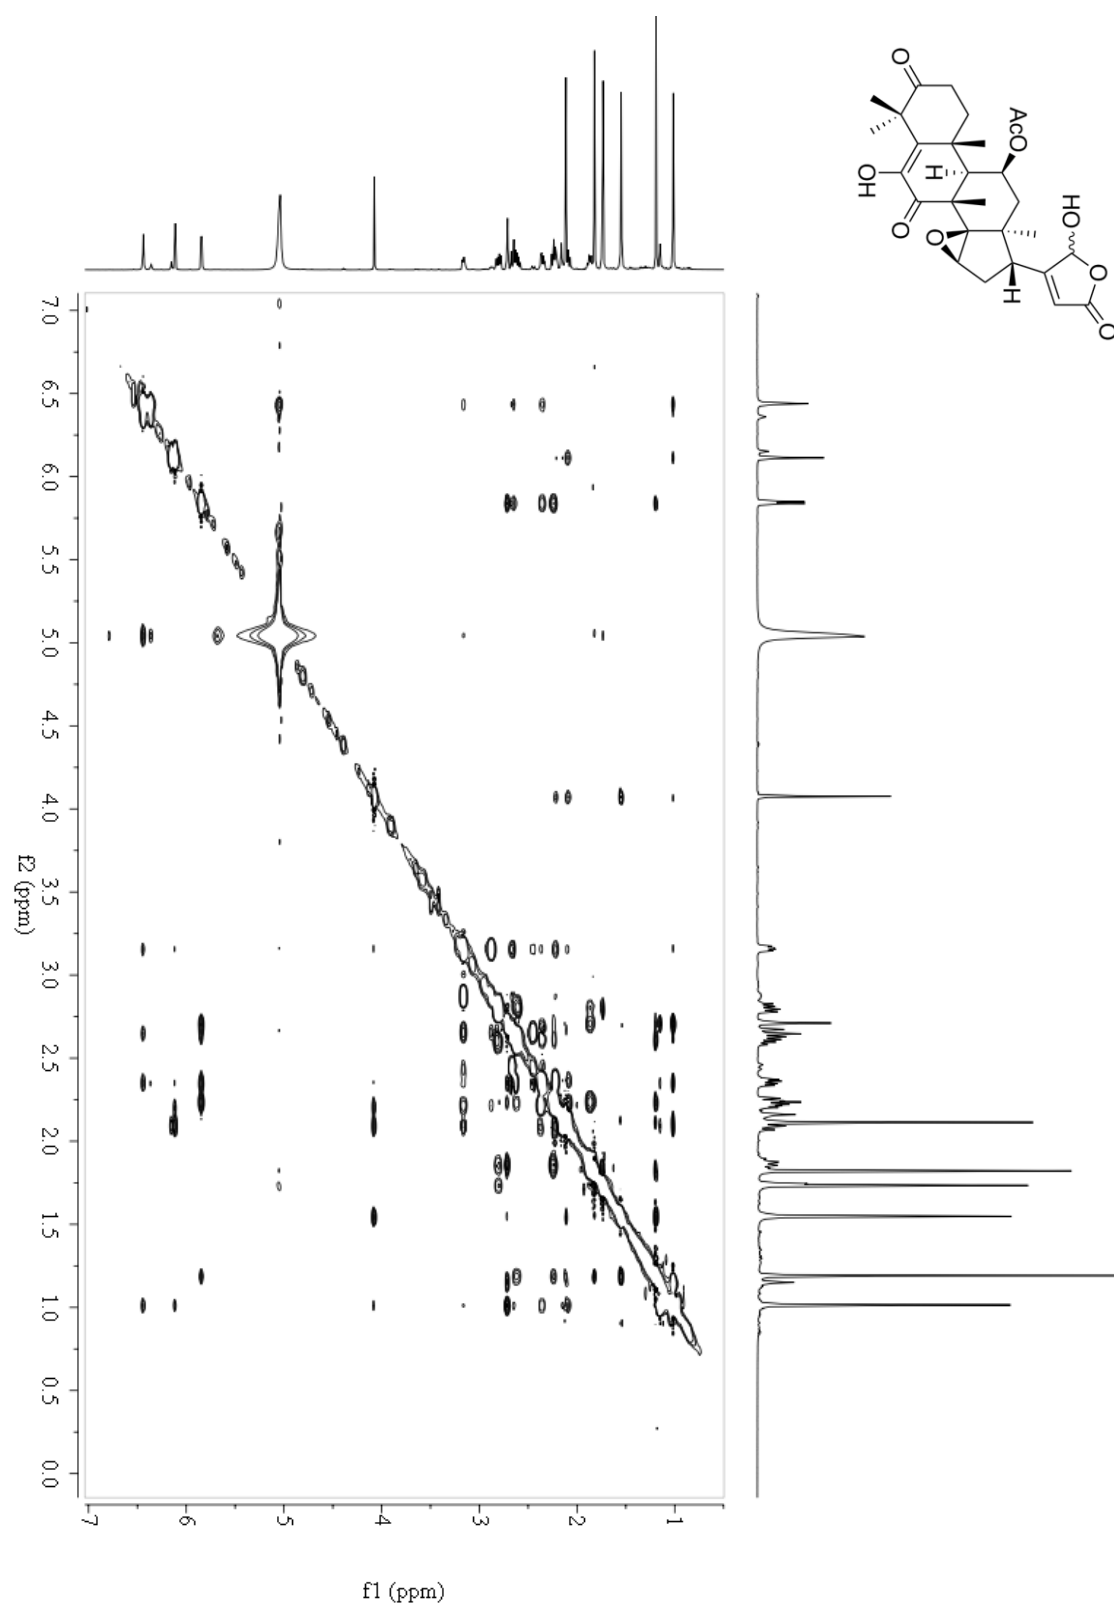

Figure S62. (+)-ESIMS spectrum of walsunoid G (7)

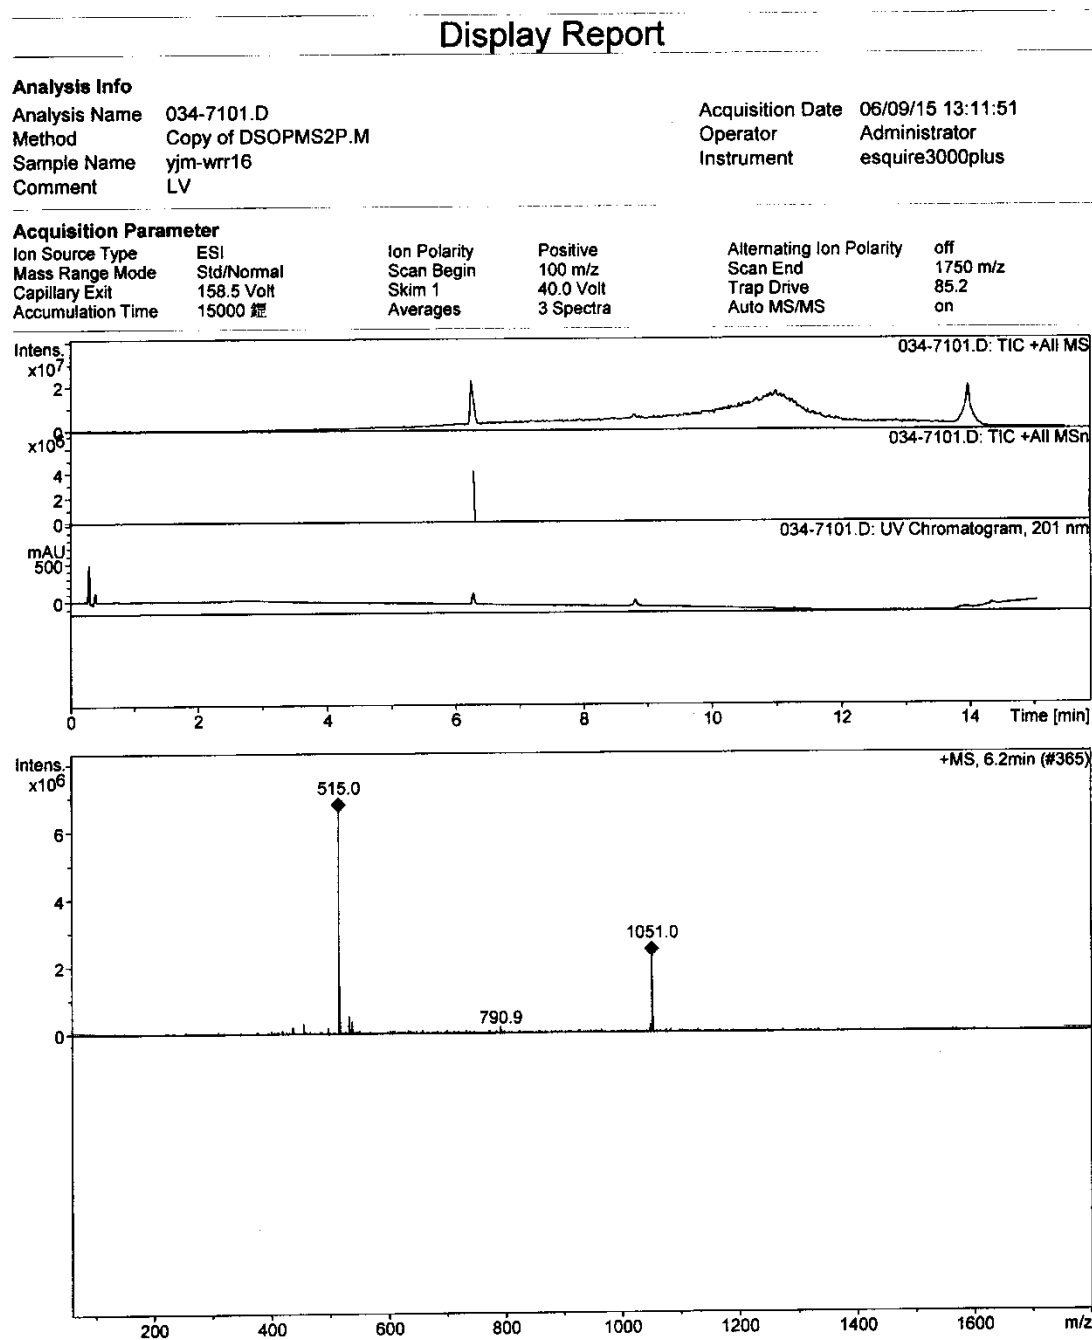



Figure S63. (-)-ESIMS spectrum of walsunoid G (7)

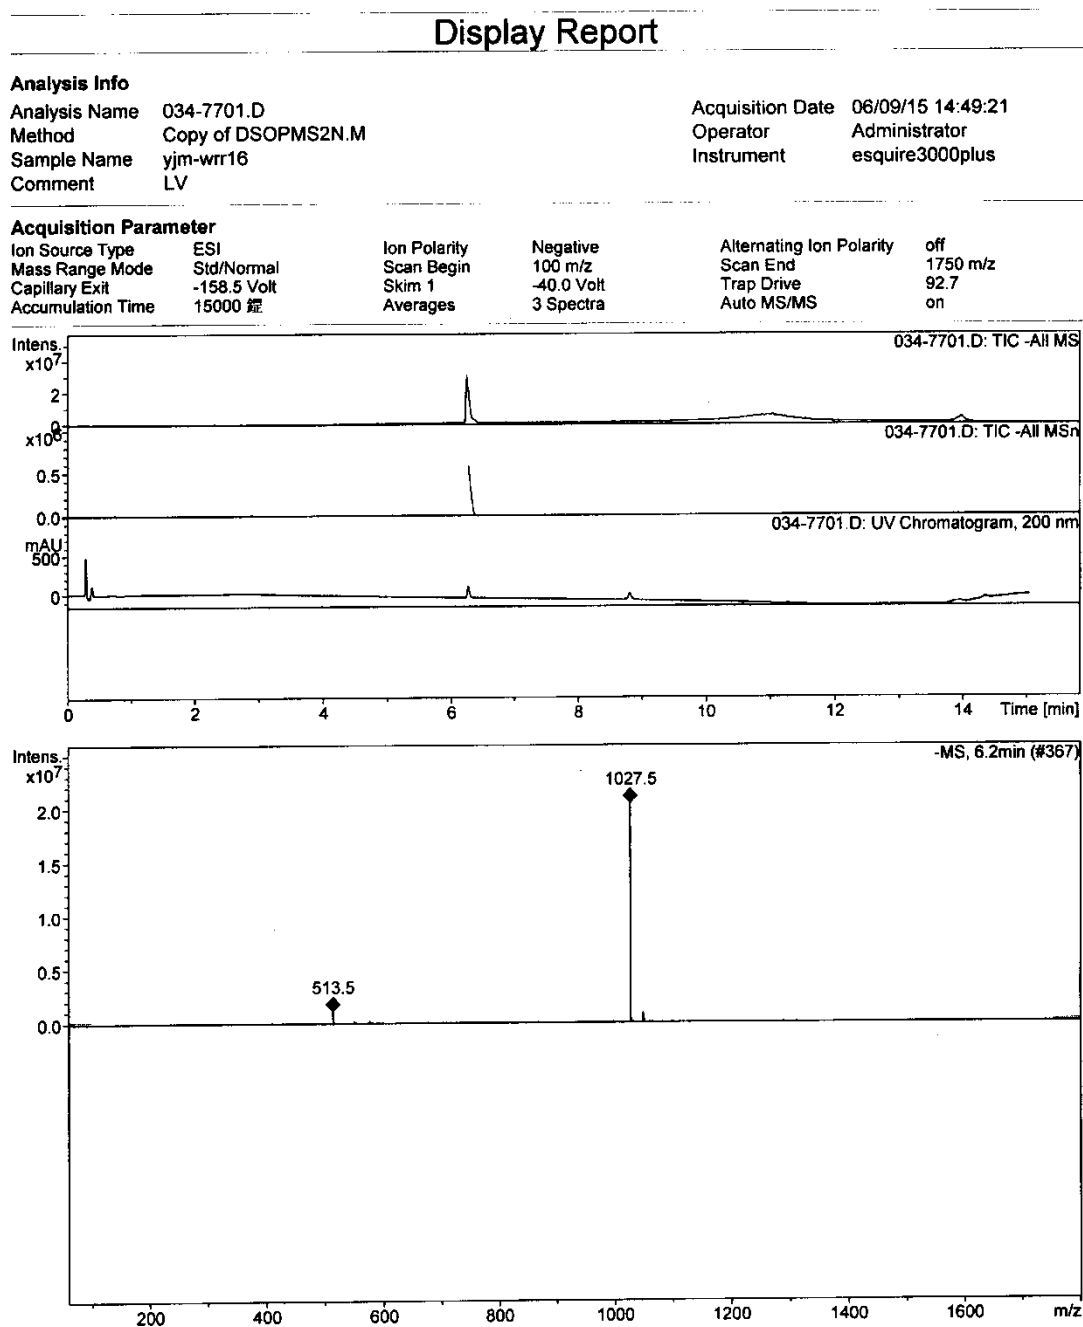

**Figure S64.** (-)-HRESIMS spectrum of walsunoid G (7)

**Elemental Composition Report**

**Page 1**

**Single Mass Analysis**

Tolerance = 5.0 PPM / DBE: min = -1.5, max = 50.0

Element prediction: Off

Number of isotope peaks used for i-FIT = 3

Monoisotopic Mass, Even Electron Ions

101 formula(e) evaluated with 1 results within limits (up to 50 closest results for each mass)

Elements Used:

C: 5-80 H: 2-120 O: 0-20

wrr16

LCT PXE KE324

11-Jun-2015

14:02:29

wrr16\_20150611 11 (0.212) AM2 (Ar,10000.0,0.00,1.00); ABS; Cm (10:22)

1: TOF MS ES-

7.74e+003

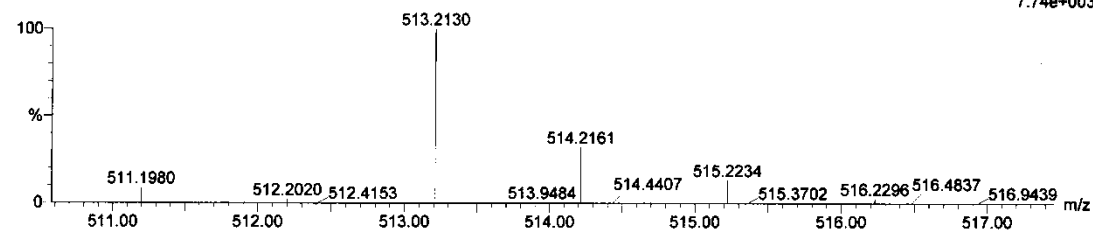

Minimum:

-1.5

Maximum:

5.0

5.0

50.0

| Mass     | Calc. Mass | mDa | PPM | DBE  | i-FIT | i-FIT (Norm) | Formula    |
|----------|------------|-----|-----|------|-------|--------------|------------|
| 513.2130 | 513.2125   | 0.5 | 1.0 | 12.5 | 63.7  | 0.0          | C28 H33 O9 |

**Figure S65.** IR spectrum of walsunoid G (**7**)

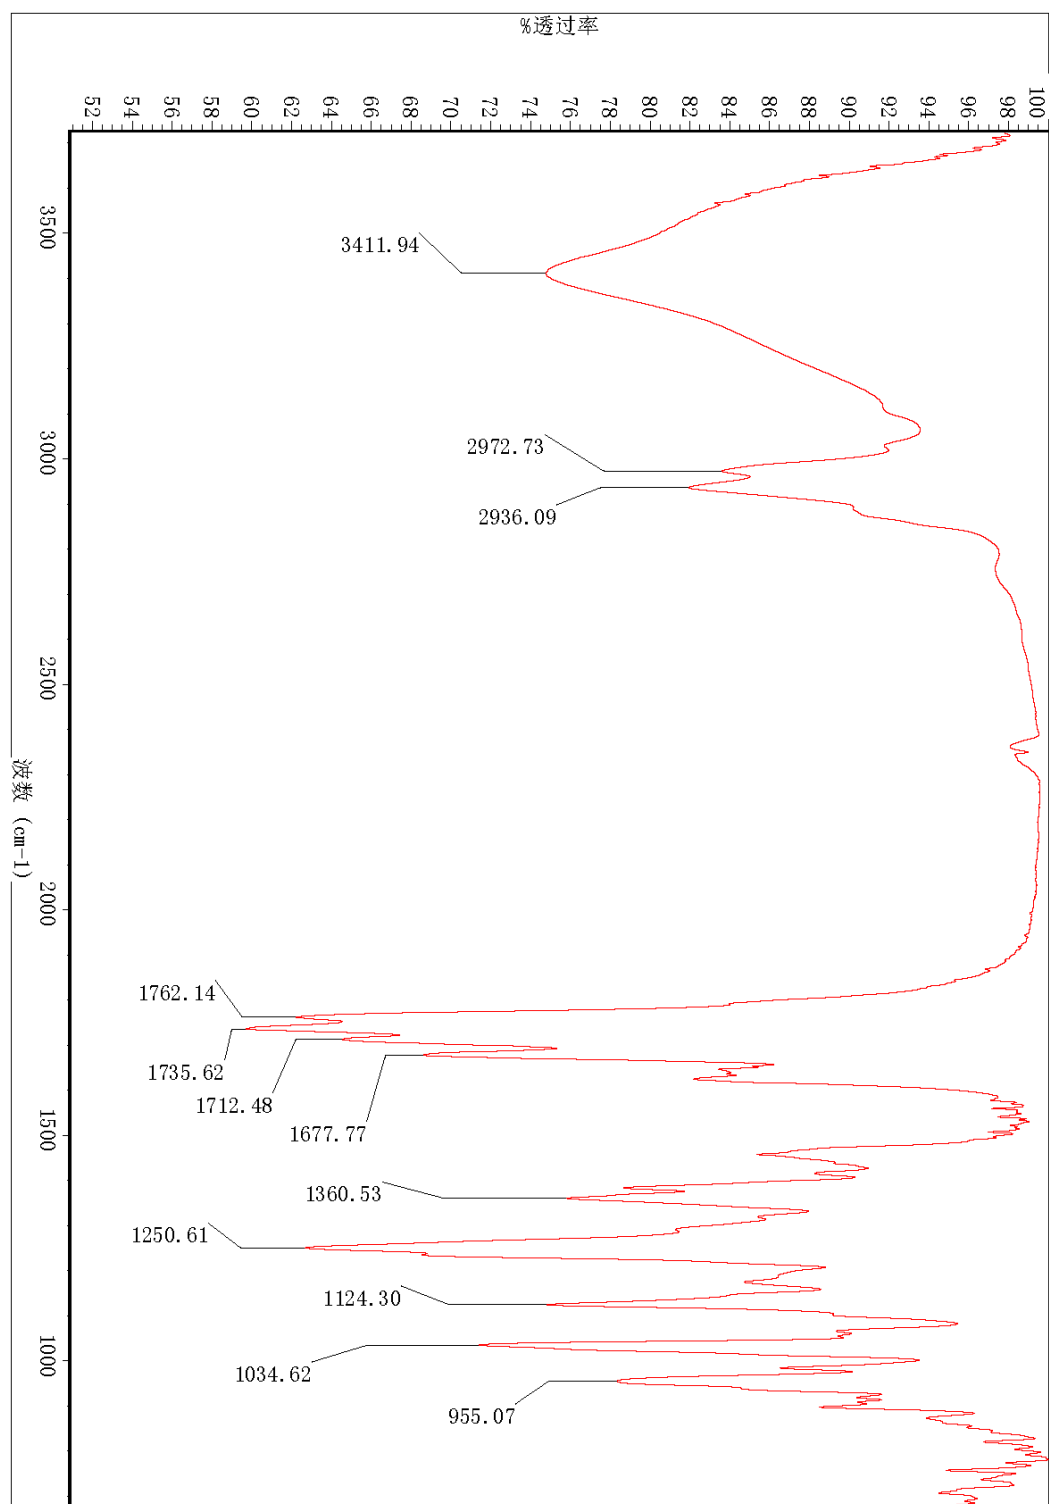

**Figure S66.**  $^1\text{H}$  NMR spectrum of walsunoid H (**8**) in  $\text{CDCl}_3$

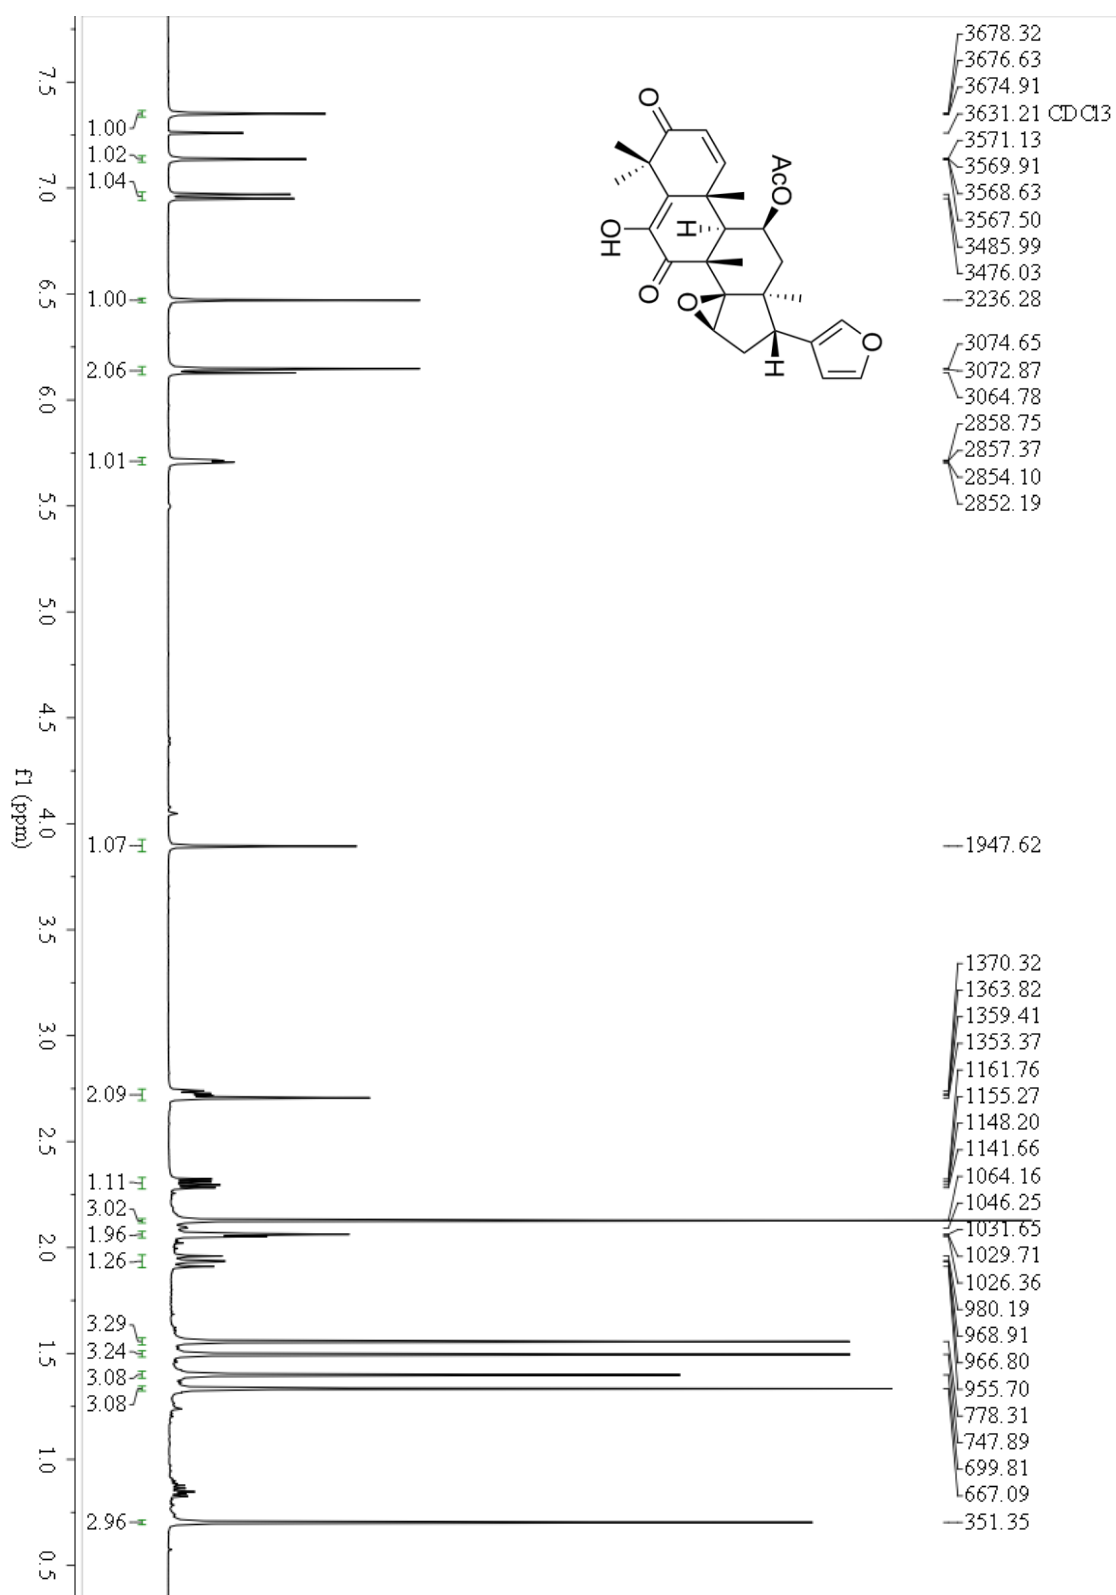

**Figure S67.**  $^{13}\text{C}$  NMR spectrum of walsunoid H (**8**) in  $\text{CDCl}_3$

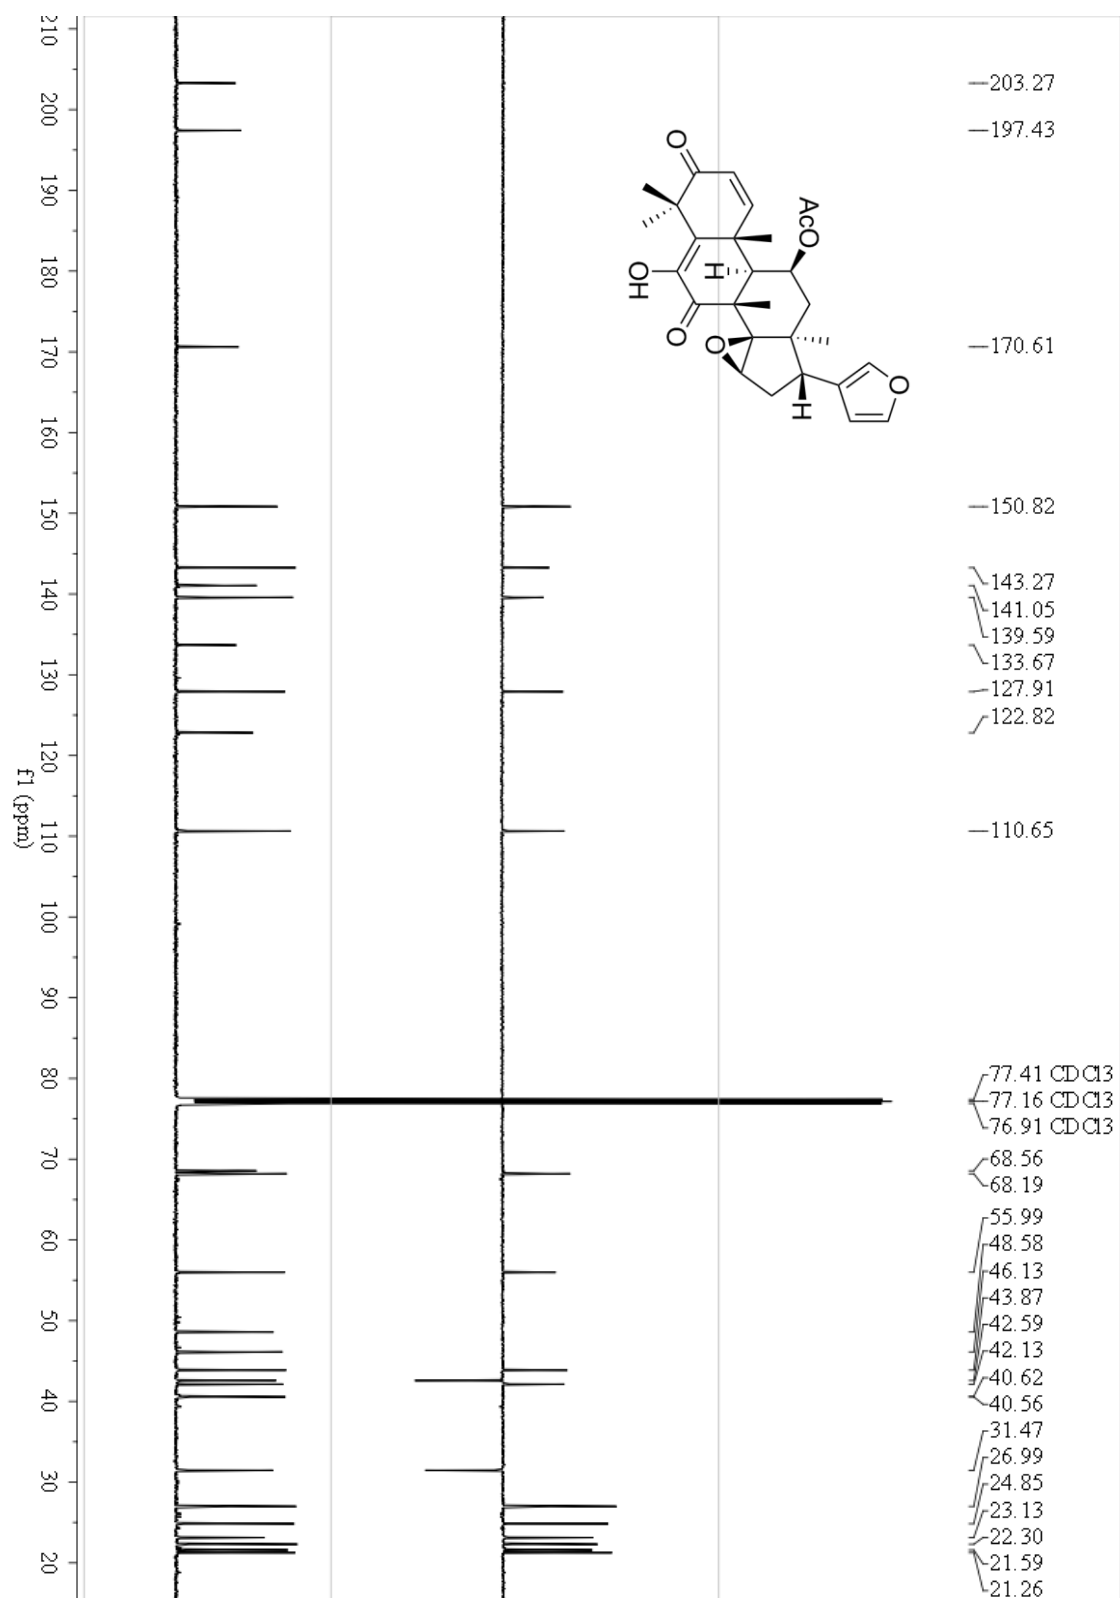

**Figure S68.** HSQC spectrum of walsunoid H (**8**) in CDCl<sub>3</sub>

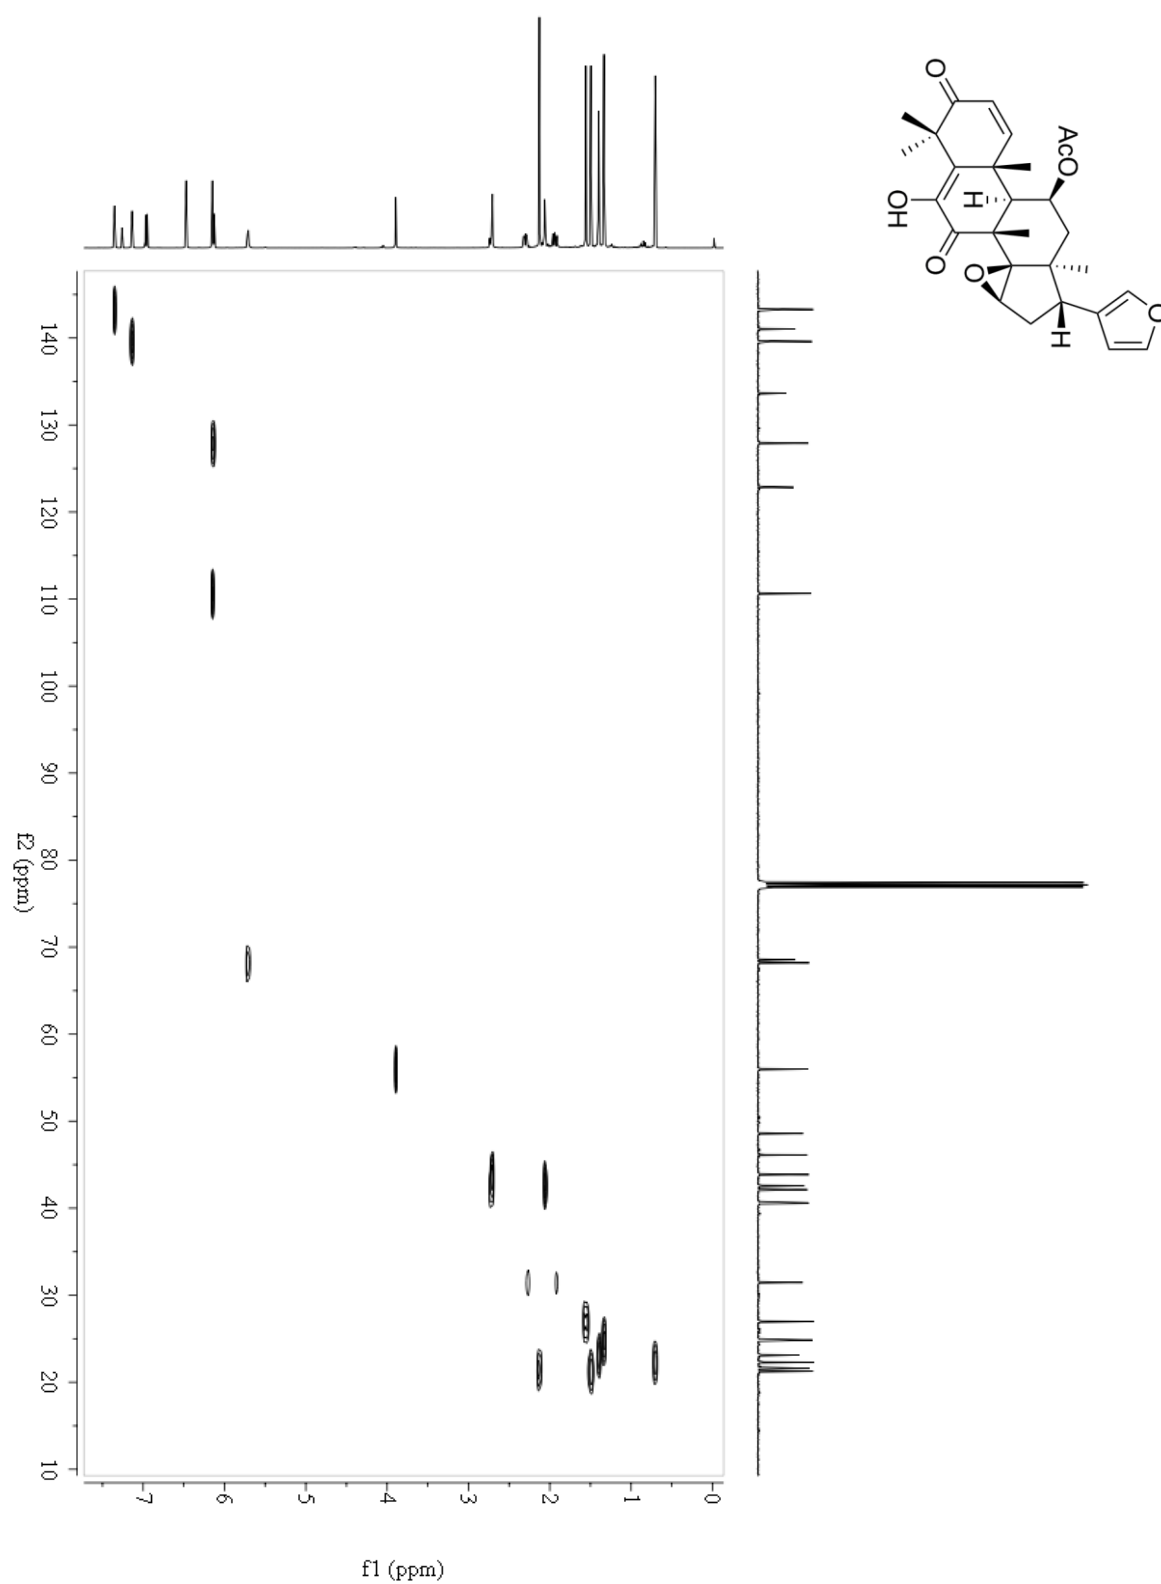

**Figure S69.** HMBC spectrum of walsunoid H (**8**) in CDCl<sub>3</sub>

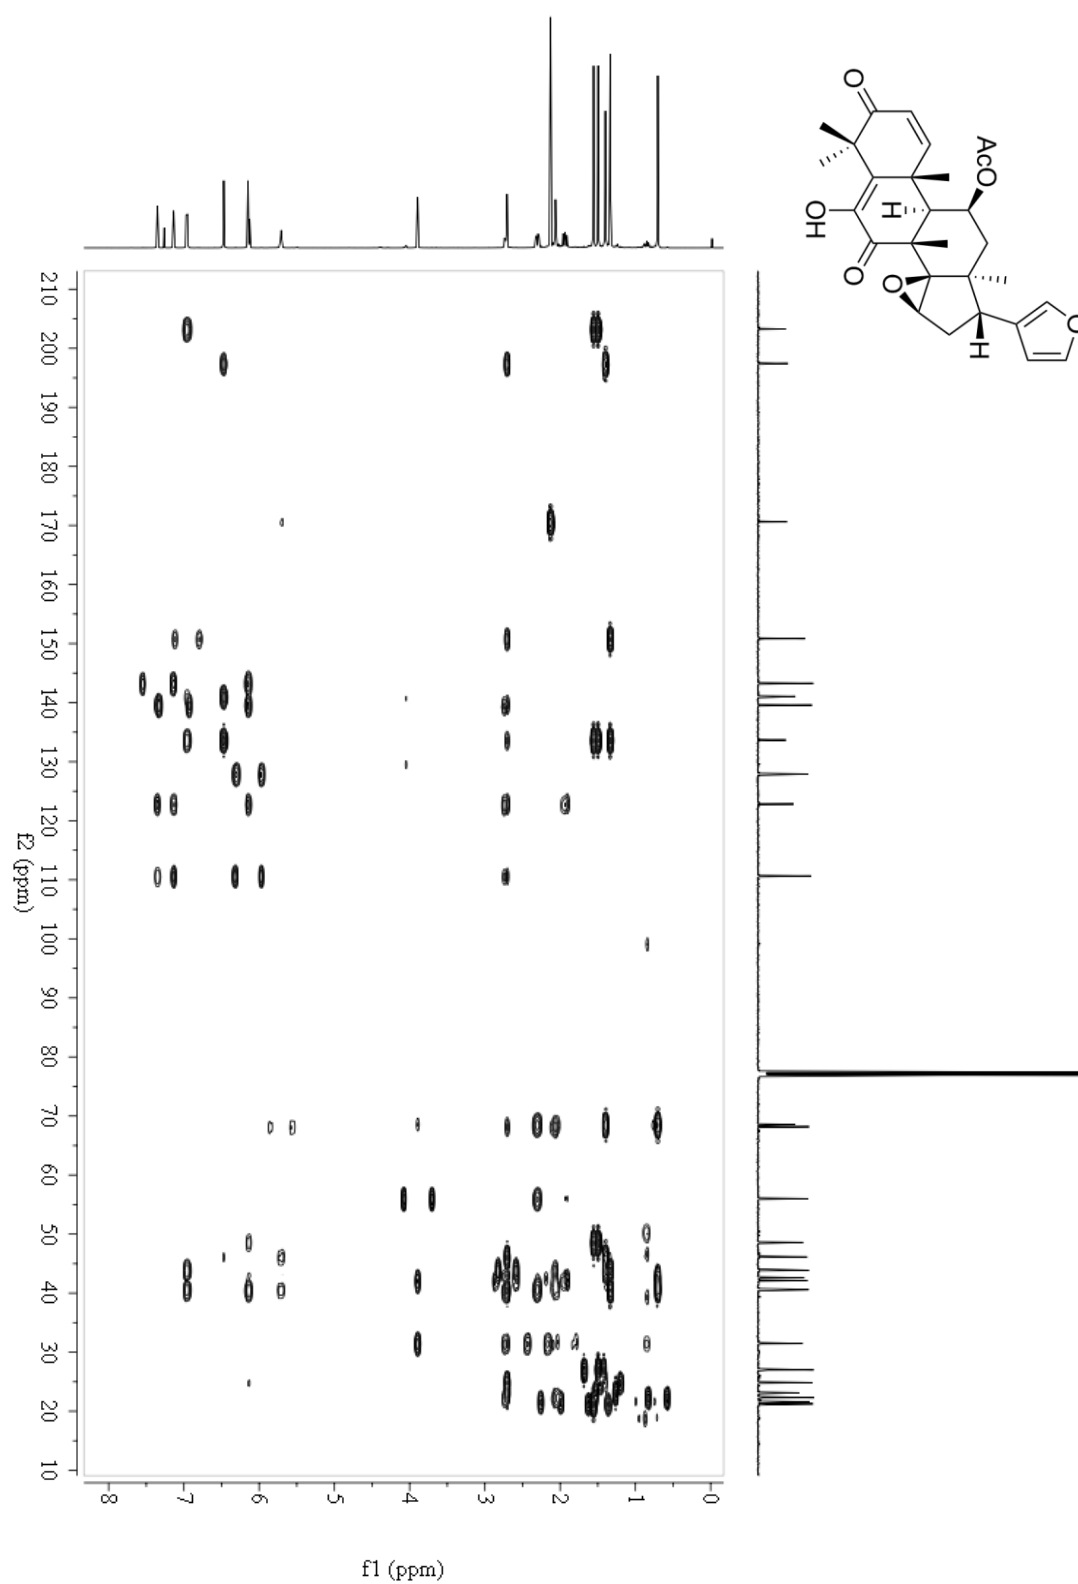

```
WRR28  CDCL3  NOESY
```

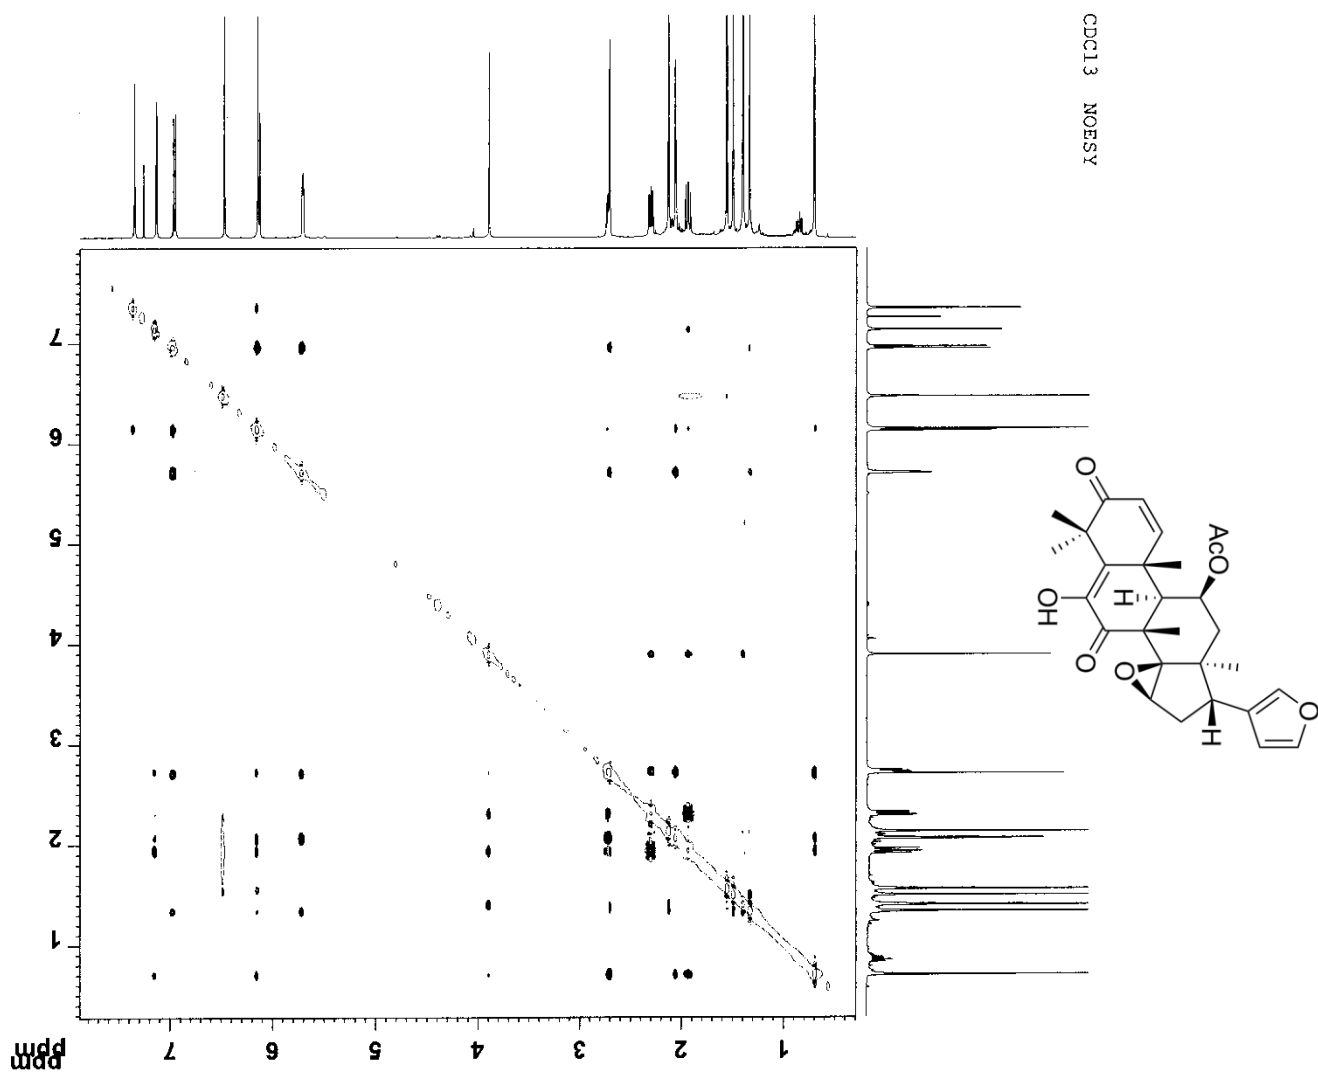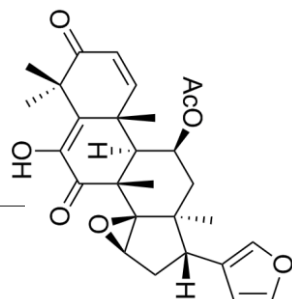

| Current Data Parameters            |                       | Acquisition Parameters |                |
|------------------------------------|-----------------------|------------------------|----------------|
| NAME                               | W128                  | Date                   | 20150605       |
| EXNO                               | 1                     | Time                   | 12.23          |
| FIDNO                              | 1                     | INSTRUM                | 5 mm CPDQ 13C  |
| PROCNO                             | 9                     | PROBHD                 | spec           |
|                                    |                       | PULPROG                | zgpg30pphph    |
|                                    |                       | TD                     | 2048           |
|                                    |                       | DELTA                  | 2.08           |
|                                    |                       | NS                     | CCCL2          |
|                                    |                       | DS                     | 16             |
|                                    |                       | SWH                    | 8012.870 Hz    |
|                                    |                       | AQ                     | 3.912510 Hz    |
|                                    |                       | TE                     | 0.178452 sec   |
|                                    |                       | RG                     | 61.53          |
|                                    |                       | RG2                    | 62.460 usec    |
|                                    |                       | TE2                    | 101.8 Hz       |
|                                    |                       | TE3                    | 101.8 Hz       |
|                                    |                       | D1                     | 0.00049931 sec |
|                                    |                       | D8                     | 1.00000000 sec |
|                                    |                       | D81                    | 0.6493998 sec  |
|                                    |                       | D11                    | 0.0300000 sec  |
|                                    |                       | D12                    | 0.0002000 sec  |
|                                    |                       | D13                    | 0.0002000 sec  |
|                                    |                       | TK0                    | 0.00012495 sec |
| ===== CHANNEL: F1 =====            |                       |                        |                |
| MUCL                               | 1H                    |                        |                |
| F1                                 | 10.75 usec            |                        |                |
| F2                                 | 25.70 usec            |                        |                |
| F3                                 | 12.000000 usec        |                        |                |
| F4                                 | 12.000000 usec        |                        |                |
| F5                                 | 1.9016000 Hz          |                        |                |
| FID10                              | 500 1135009 KHz       |                        |                |
| ===== GRADIENT CHANNEL: =====      |                       |                        |                |
| GRANA1                             | SHG10:100             |                        |                |
| GPZ1                               | 40.00 V               |                        |                |
| P16                                | 1000.00 usec          |                        |                |
| ===== Acquisition parameters ===== |                       |                        |                |
| F1                                 | 320                   |                        |                |
| TD                                 | 500,135 Hz            |                        |                |
| SFO1                               | 25.00659 Hz           |                        |                |
| FIDRES                             | 16.000 ppm            |                        |                |
| SW                                 | Stable-TFPI           |                        |                |
| PRMODE                             | Stable-TFPI           |                        |                |
| ===== Processing parameters =====  |                       |                        |                |
| S1                                 | 500,1350075 MHz       |                        |                |
| SI                                 | 1024                  |                        |                |
| MSW                                | OSINE                 |                        |                |
| SSB                                | 2                     |                        |                |
| PC                                 | 1.00                  |                        |                |
| LB                                 | 0 Hz                  |                        |                |
| GB                                 | 0 Hz                  |                        |                |
| ===== Processing parameters =====  |                       |                        |                |
| F1                                 | Processing parameters |                        |                |
| S1                                 | 1024                  |                        |                |
| MS2                                | Stable-TFPI           |                        |                |
| SF                                 | 500.1300104 MHz       |                        |                |
| MMW                                |                       |                        |                |
| SSB                                | 2                     |                        |                |
| LB                                 | 0 Hz                  |                        |                |
| GB                                 | 0 Hz                  |                        |                |



**Figure S71.** (+)-ESIMS spectrum of walsunoid H (**8**)

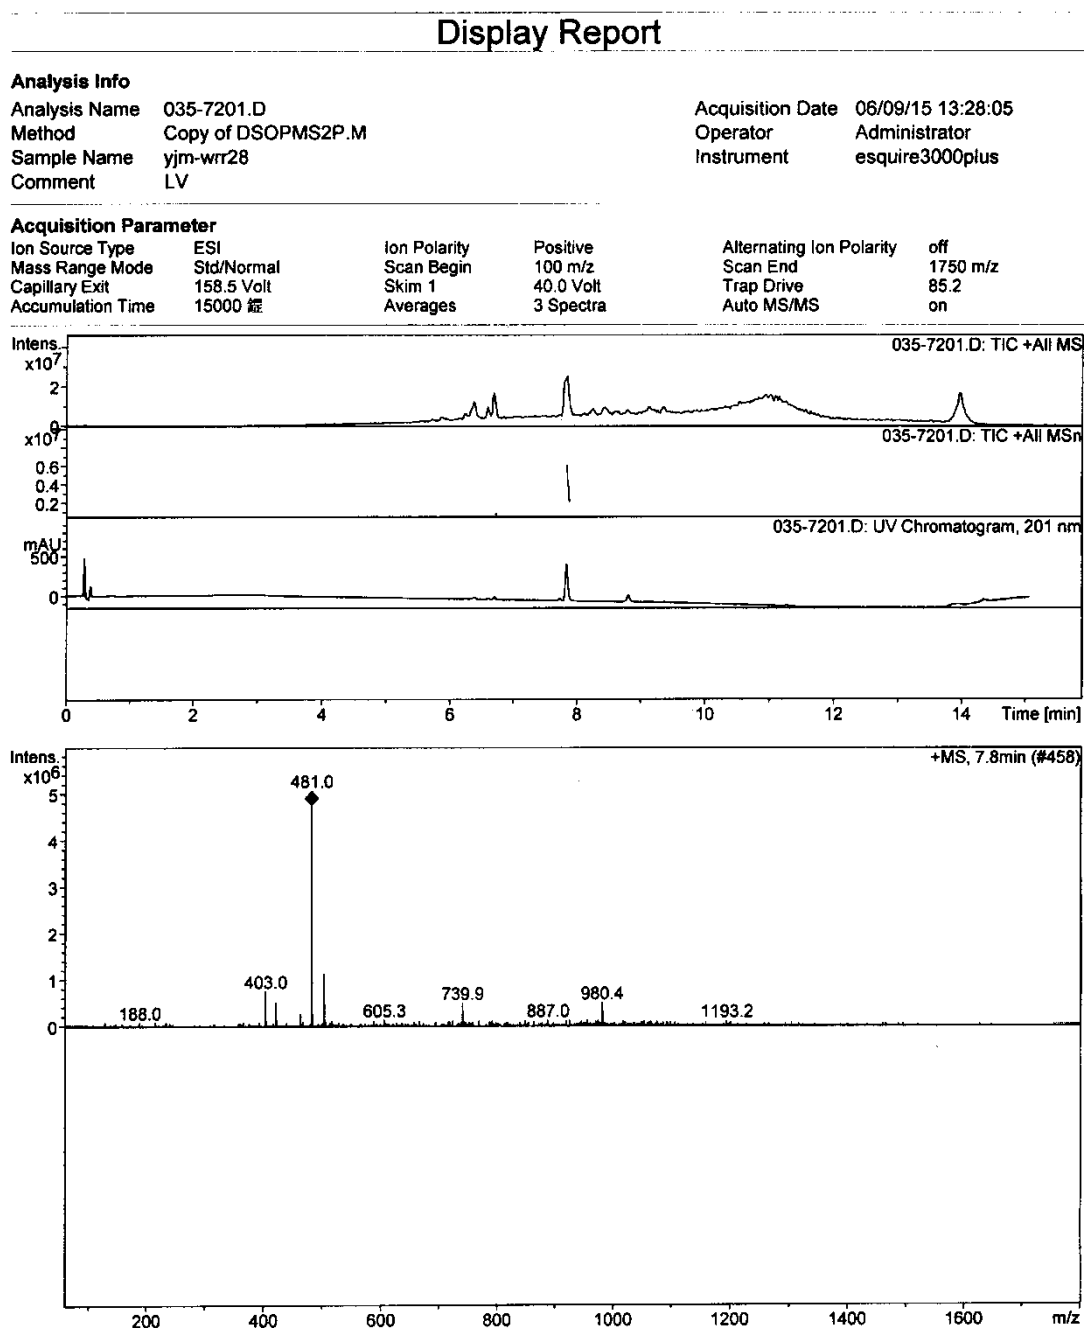

**Figure S72.** (-)-ESIMS spectrum of walsunoid H (8)

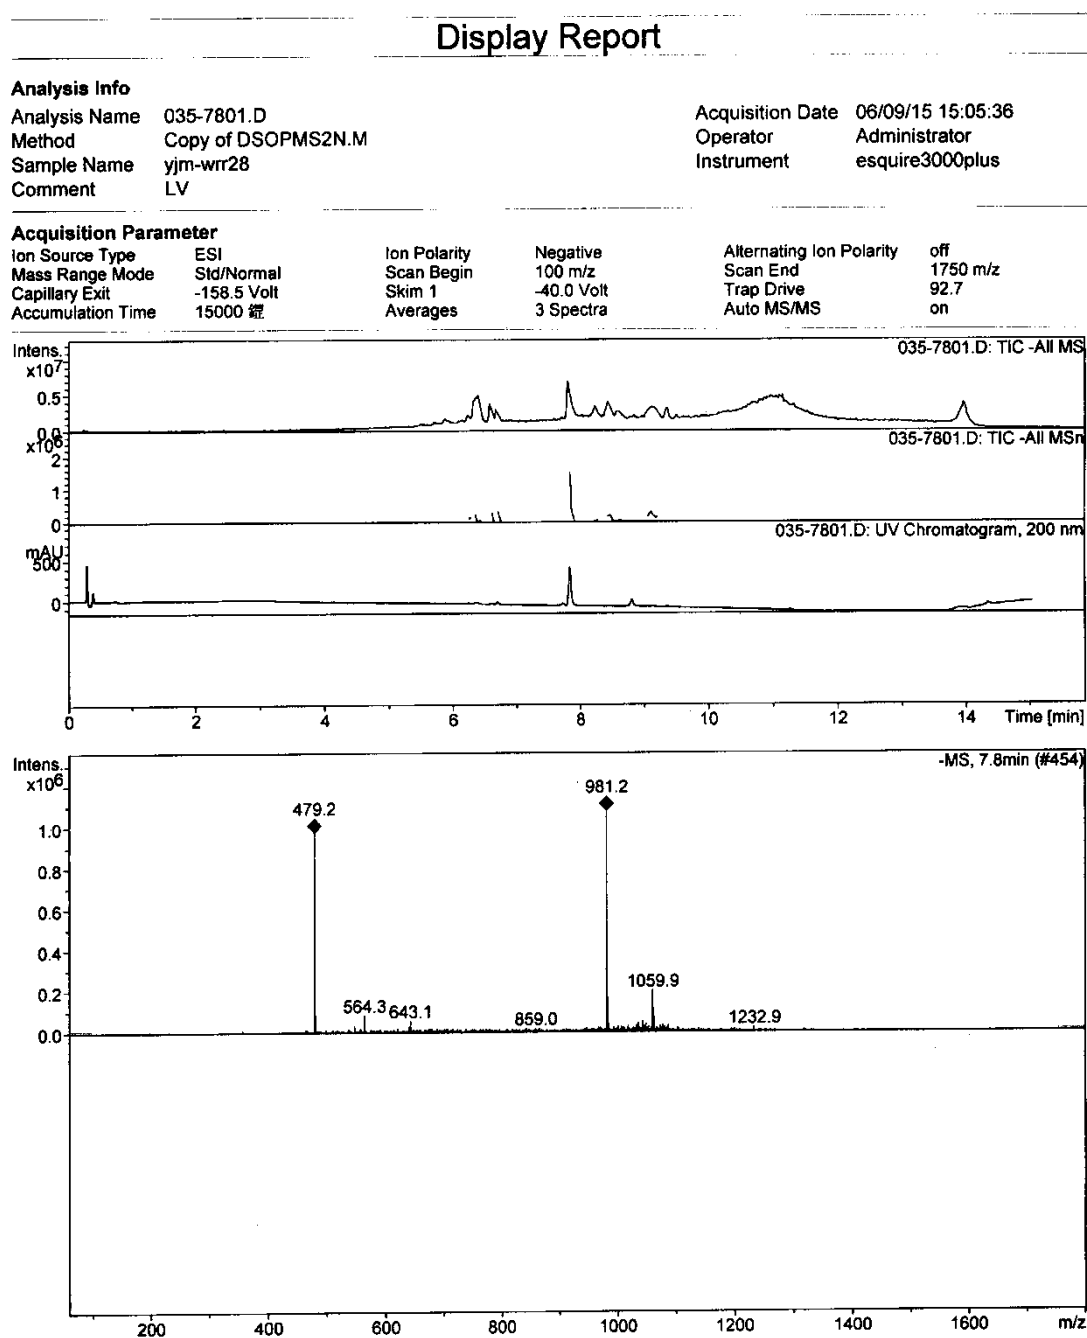

**Figure S73.** (-)-HRESIMS spectrum of walsunoid H (**8**)

**Elemental Composition Report**

**Page 1**

**Single Mass Analysis**

Tolerance = 5.0 PPM / DBE: min = -1.5, max = 50.0

Element prediction: Off

Number of isotope peaks used for i-FIT = 3

Monoisotopic Mass, Even Electron Ions

96 formula(e) evaluated with 1 results within limits (up to 50 closest results for each mass)

Elements Used:

C: 5-80 H: 2-120 O: 0-20

wrr28

LCT PXE KE324

11-Jun-2015

14:10:05

wrr28\_20150611 15 (0.317) AM2 (Ar,10000.0,0.00,1.00); ABS; Cm (7:20)

1: TOF MS ES-  
6.98e+003

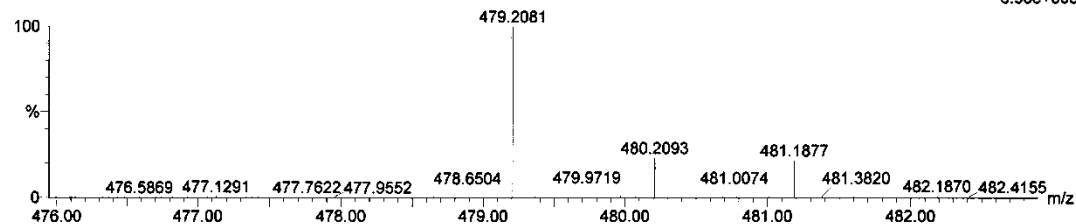

Minimum: -1.5  
Maximum: 5.0 5.0 50.0

| Mass     | Calc. Mass | mDa | PPM | DBE  | i-FIT | i-FIT (Norm) | Formula    |
|----------|------------|-----|-----|------|-------|--------------|------------|
| 479.2081 | 479.2070   | 1.1 | 2.3 | 13.5 | 123.7 | 0.0          | C28 H31 O7 |

**Figure S74.** IR spectrum of walsunoid H (**8**)

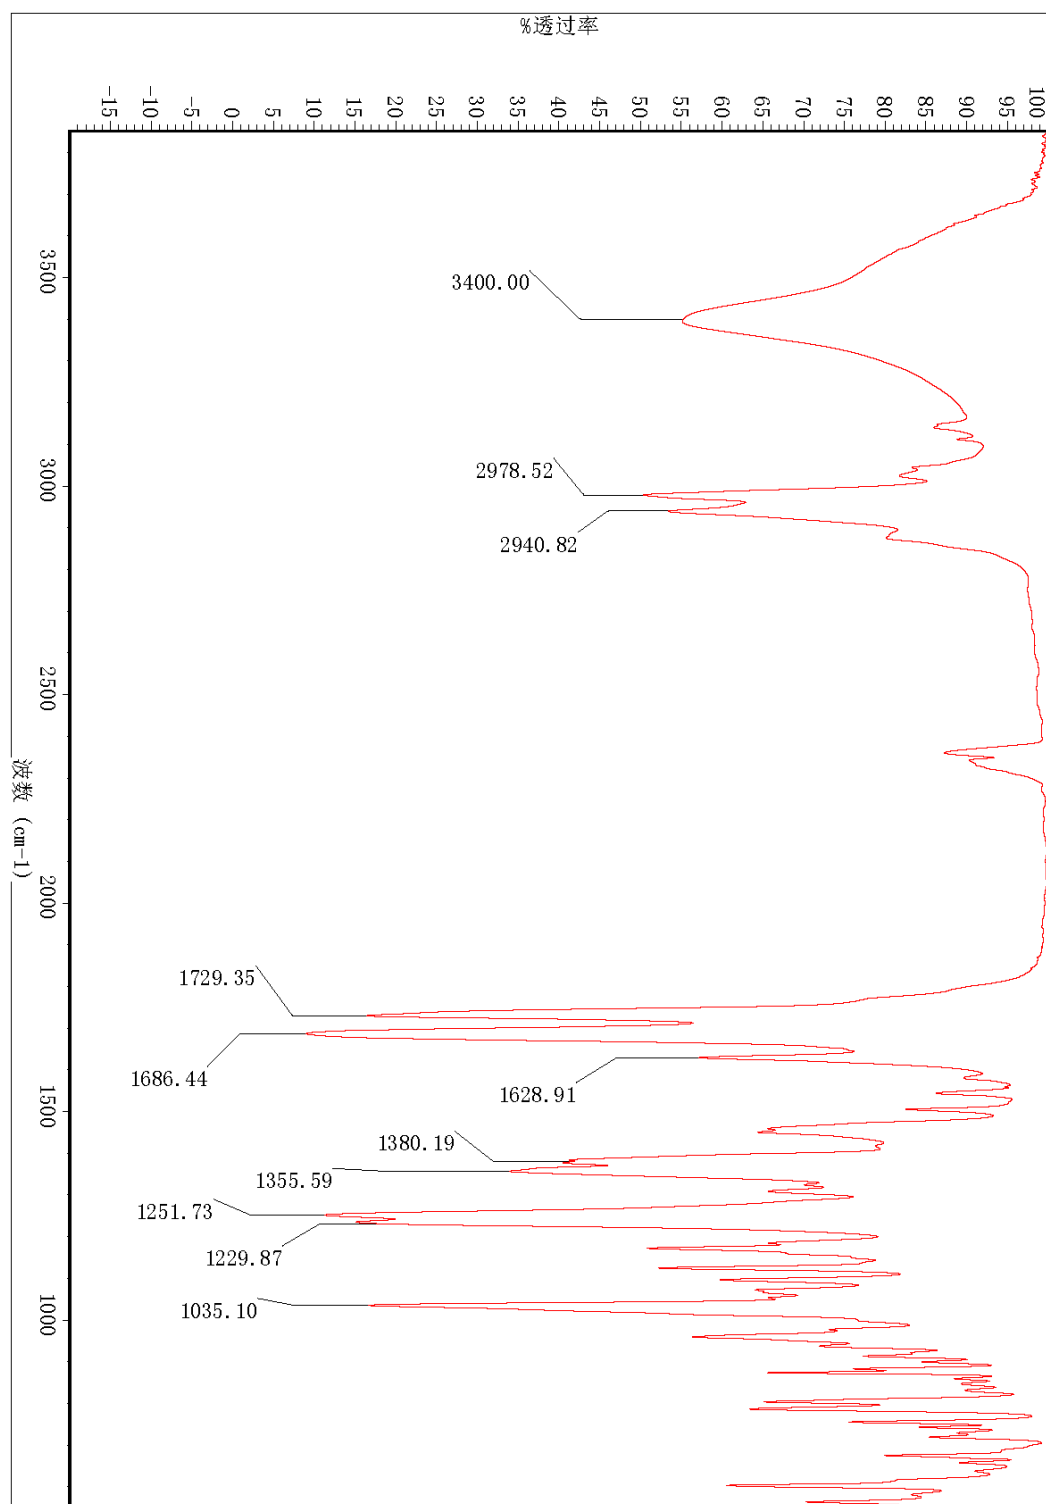

**Figure S75.**  $^1\text{H}$  NMR spectrum of walsunoid I (**9**) in  $\text{CDCl}_3$

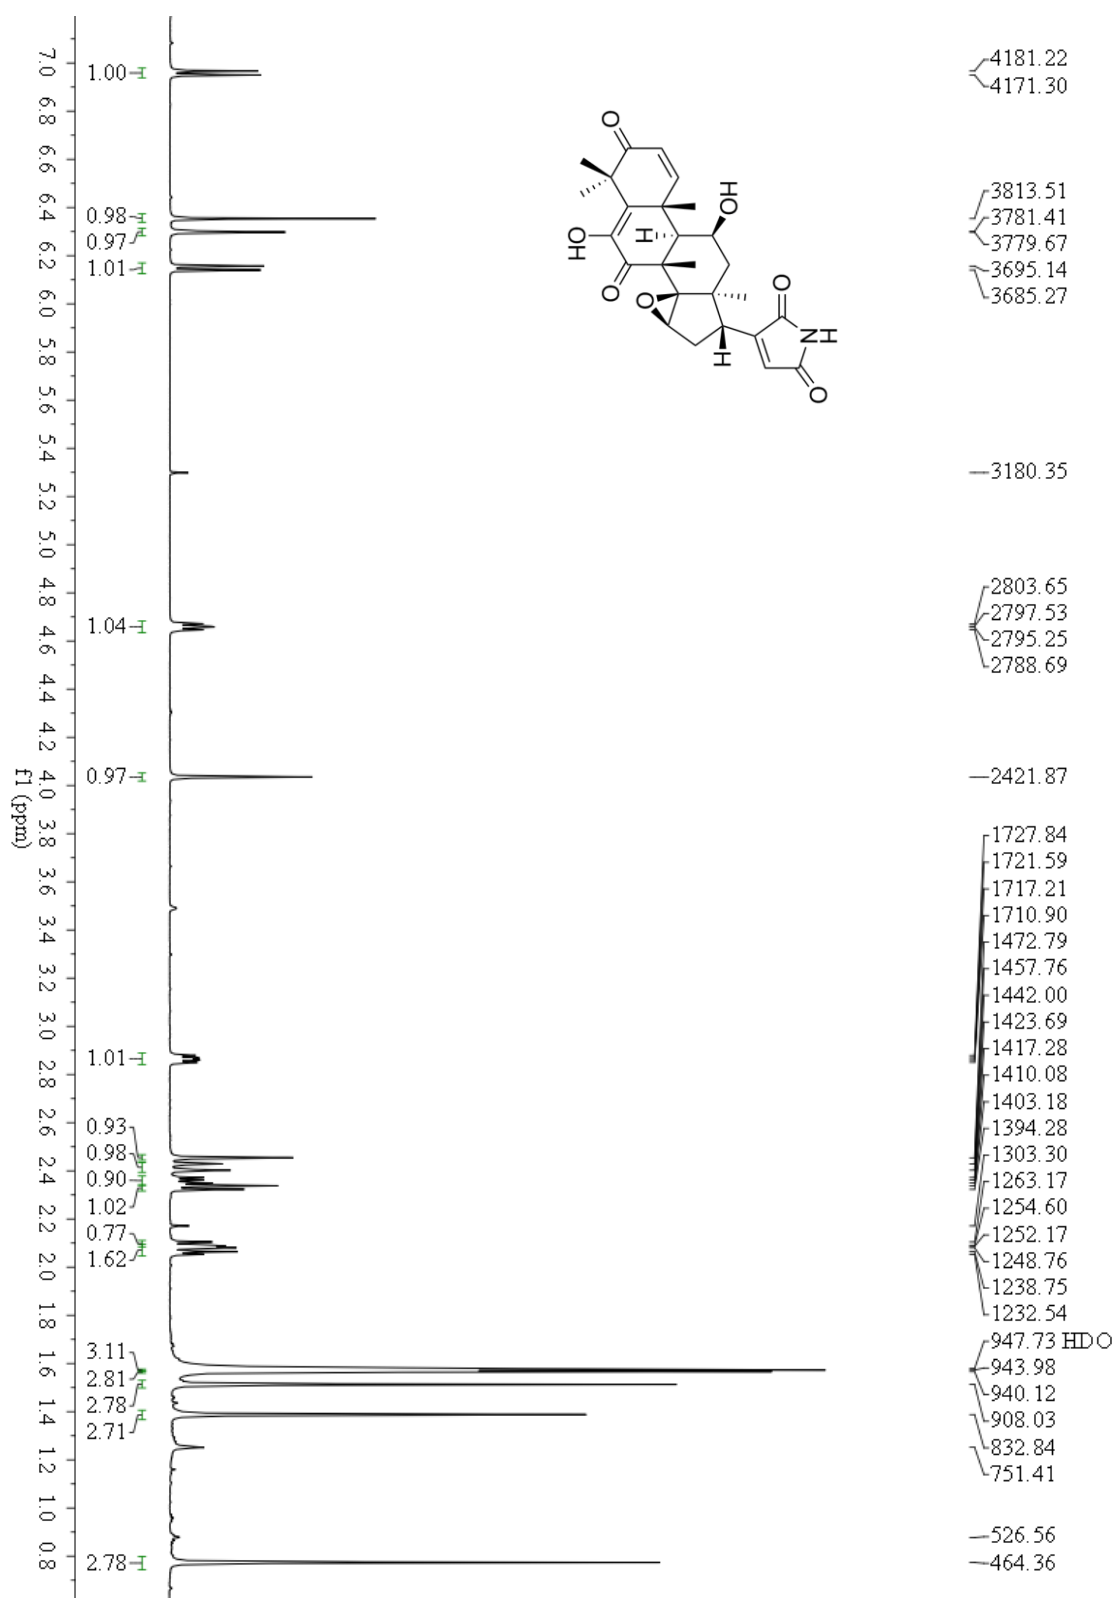

**Figure S76.**  $^{13}\text{C}$  NMR spectrum of walsunoid I (**9**) in  $\text{CDCl}_3$

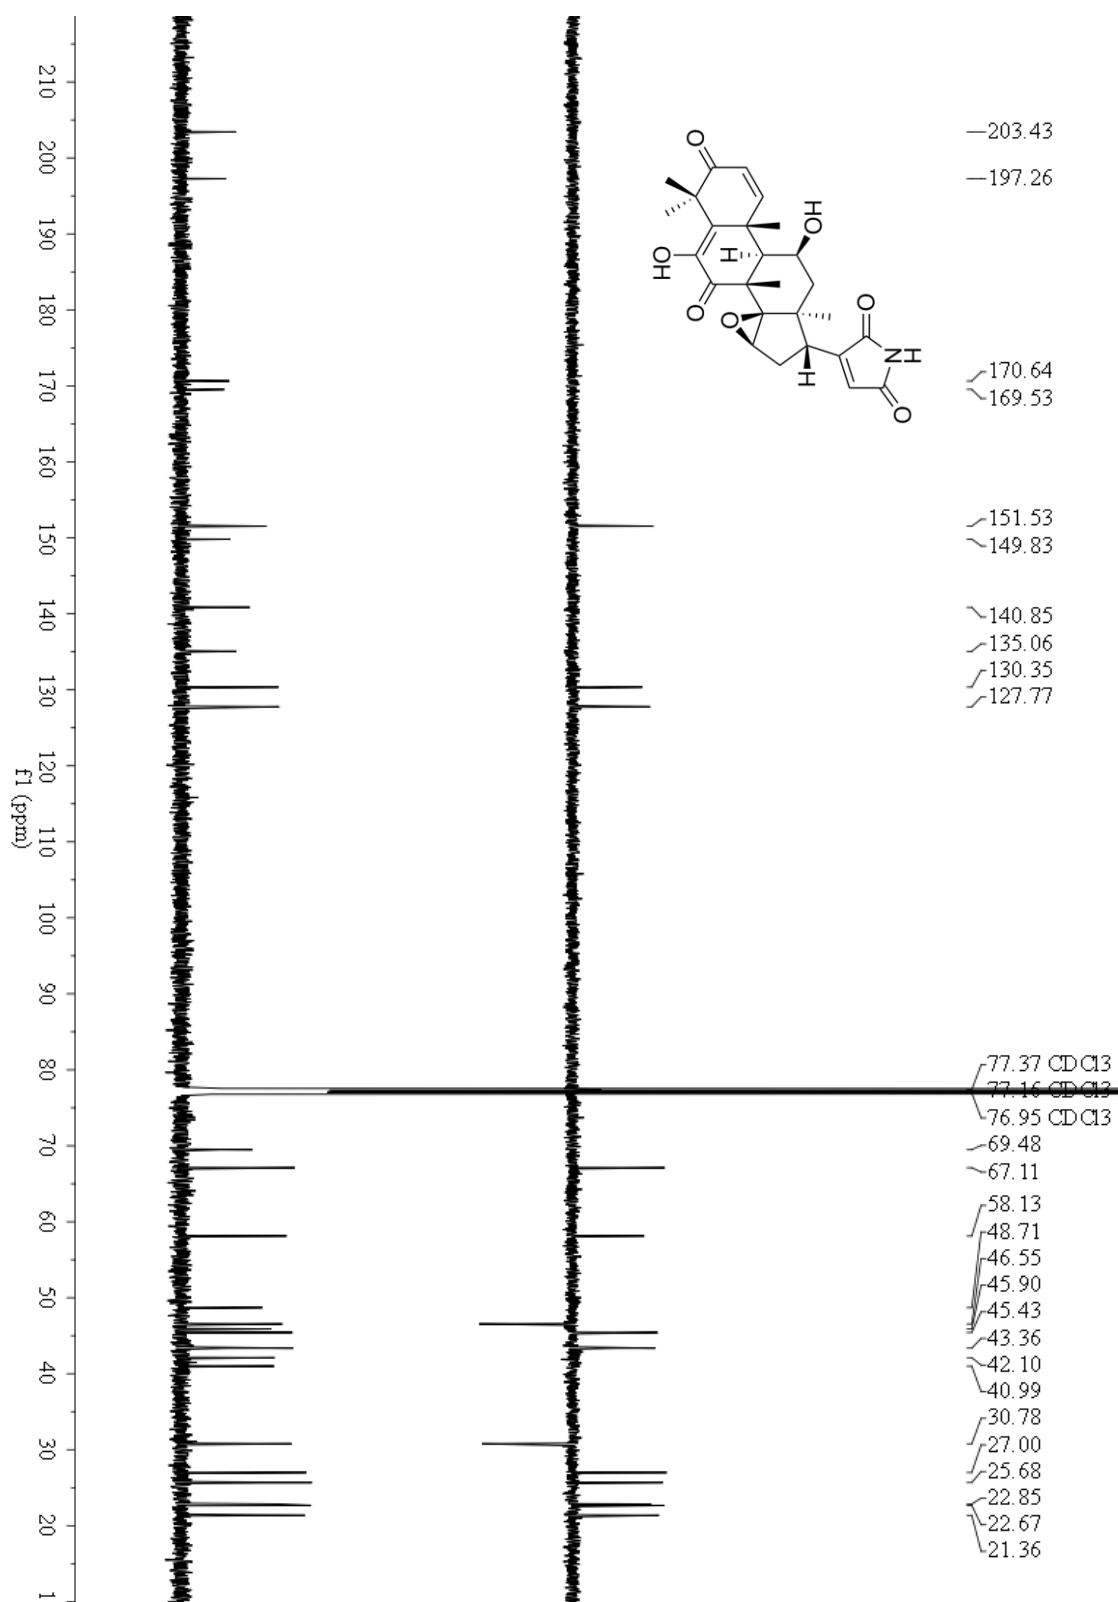

**Figure S77.** HSQC spectrum of walsunoid I (**9**) in CDCl<sub>3</sub>

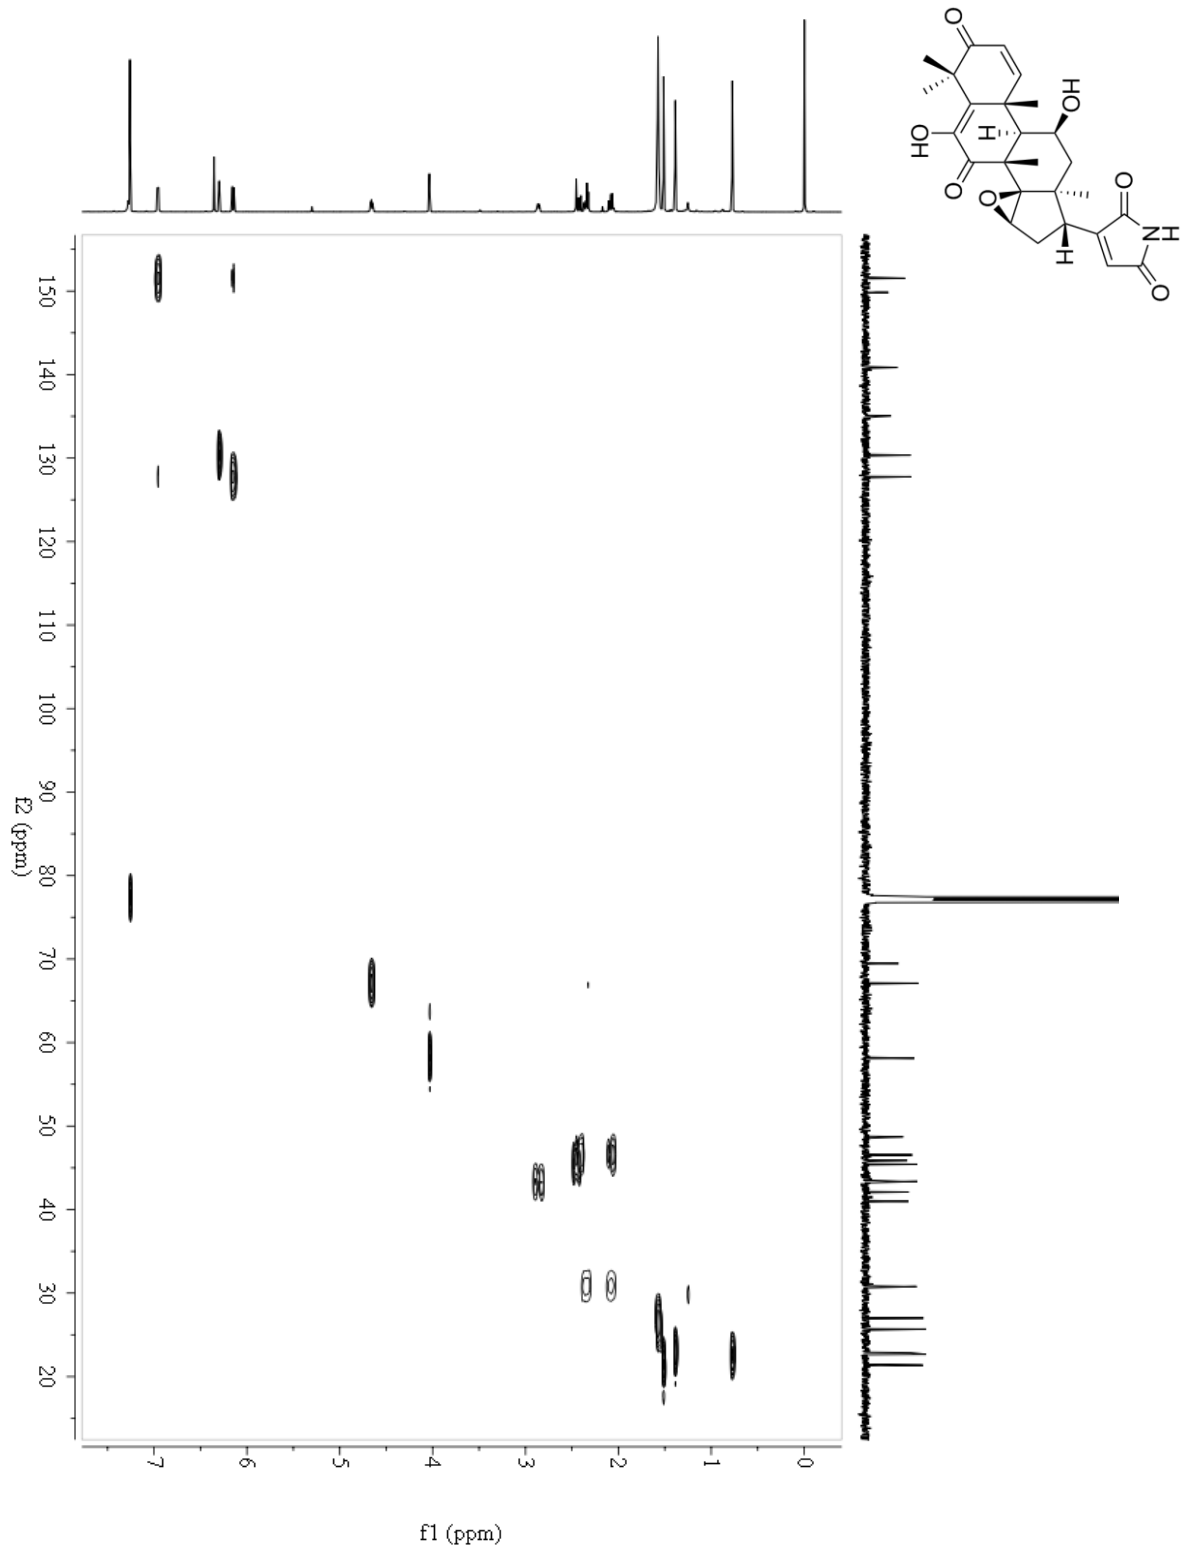





**Figure S79.**  $^1\text{H}$ - $^1\text{H}$  COSY spectrum of walsunoid I (**9**) in  $\text{CDCl}_3$

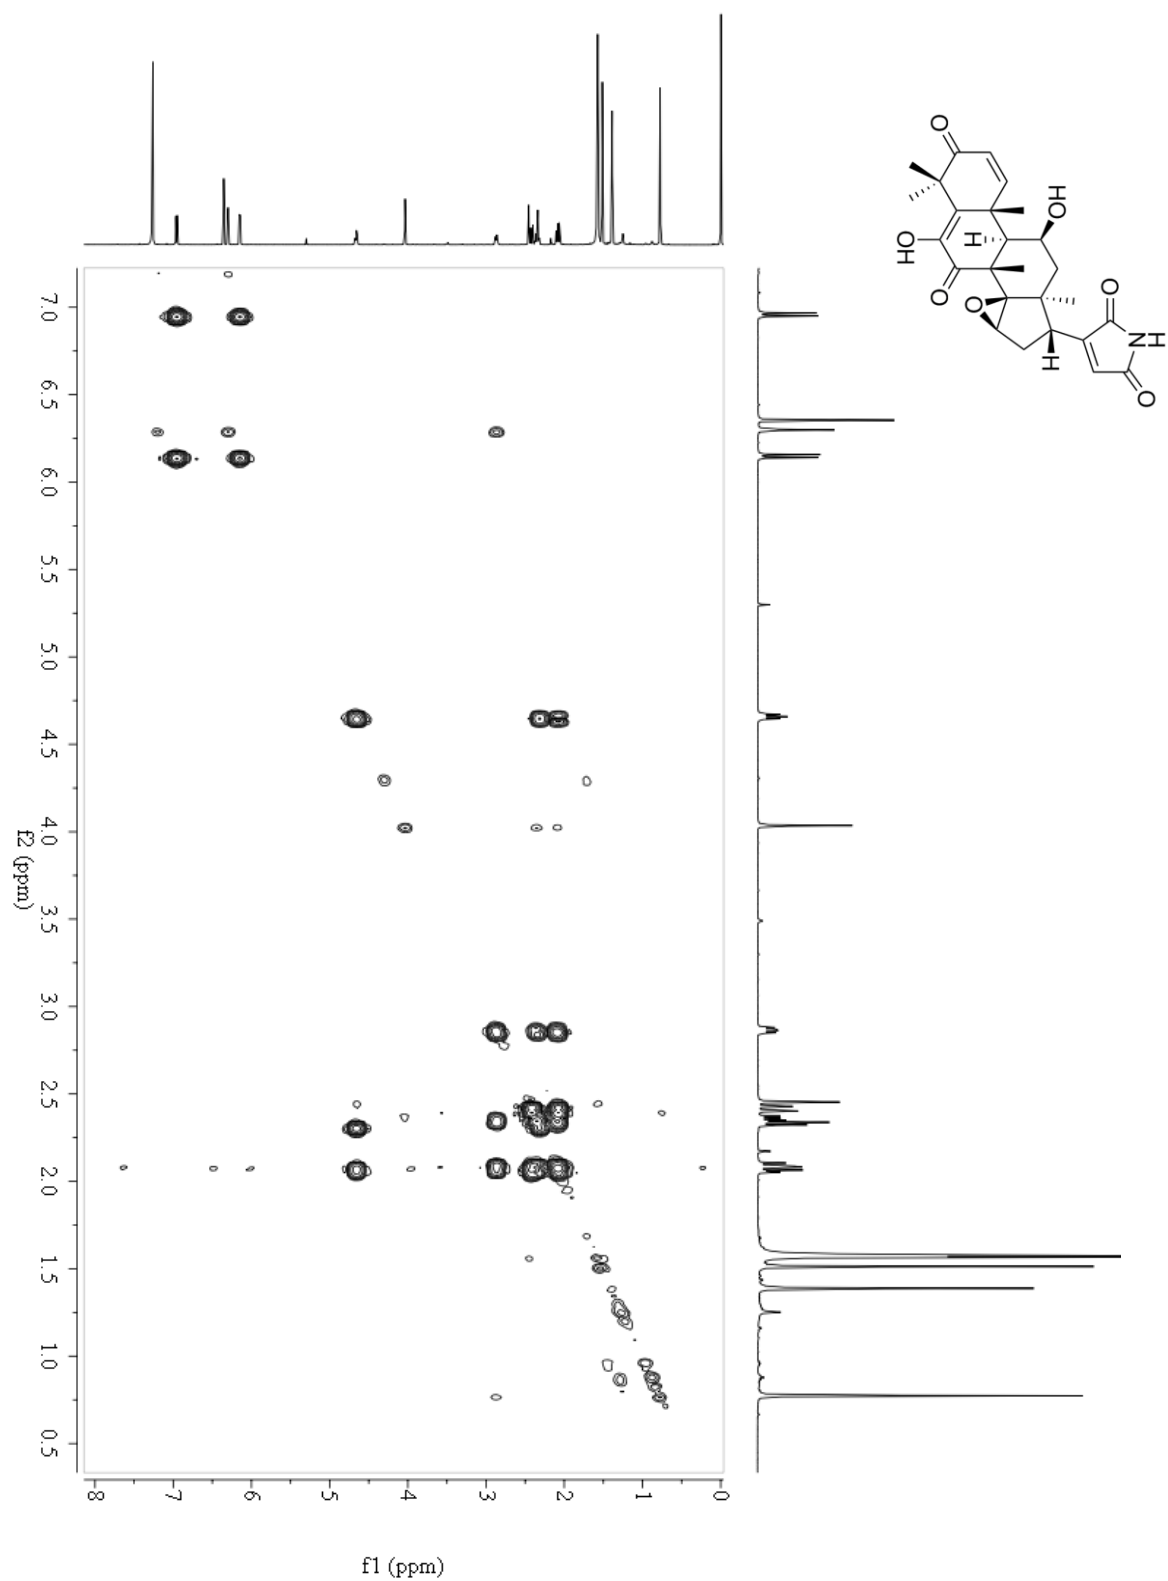

Figure S80. NOESY spectrum of walsunoid I (9) in CDCl<sub>3</sub>

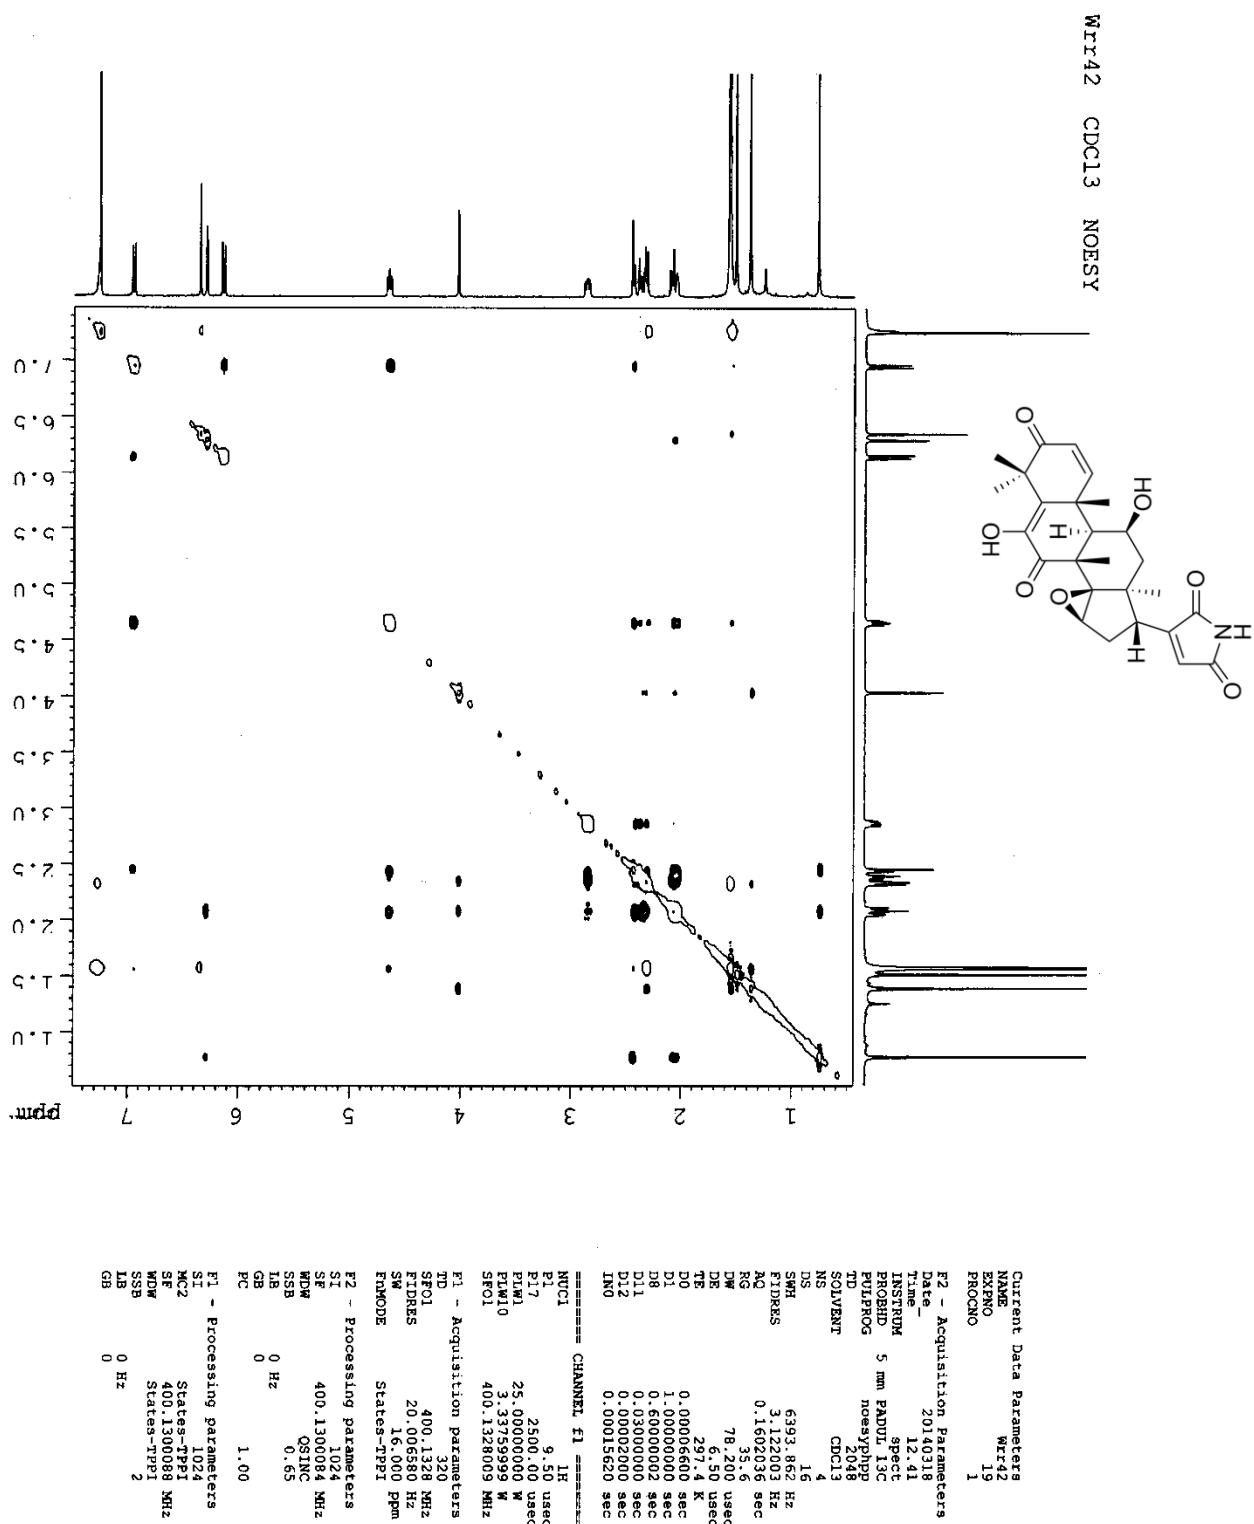

**Figure S81.** (+)-ESIMS spectrum of walsunoid I (**9**)

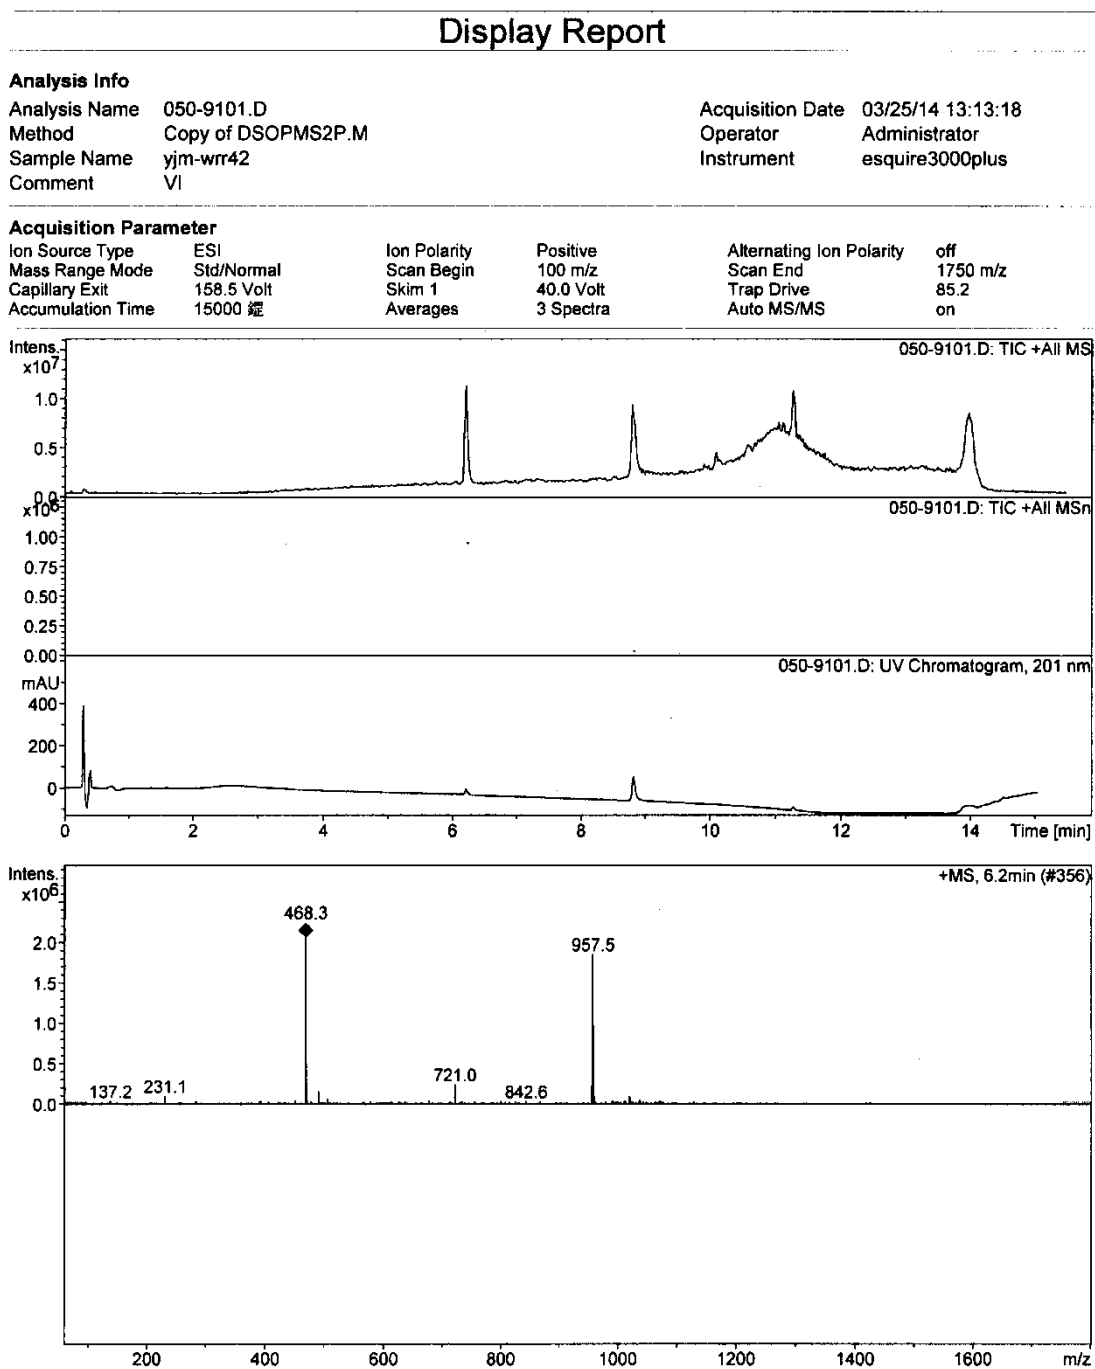

Figure S82. (-)-ESIMS spectrum of walsunoid I (9)

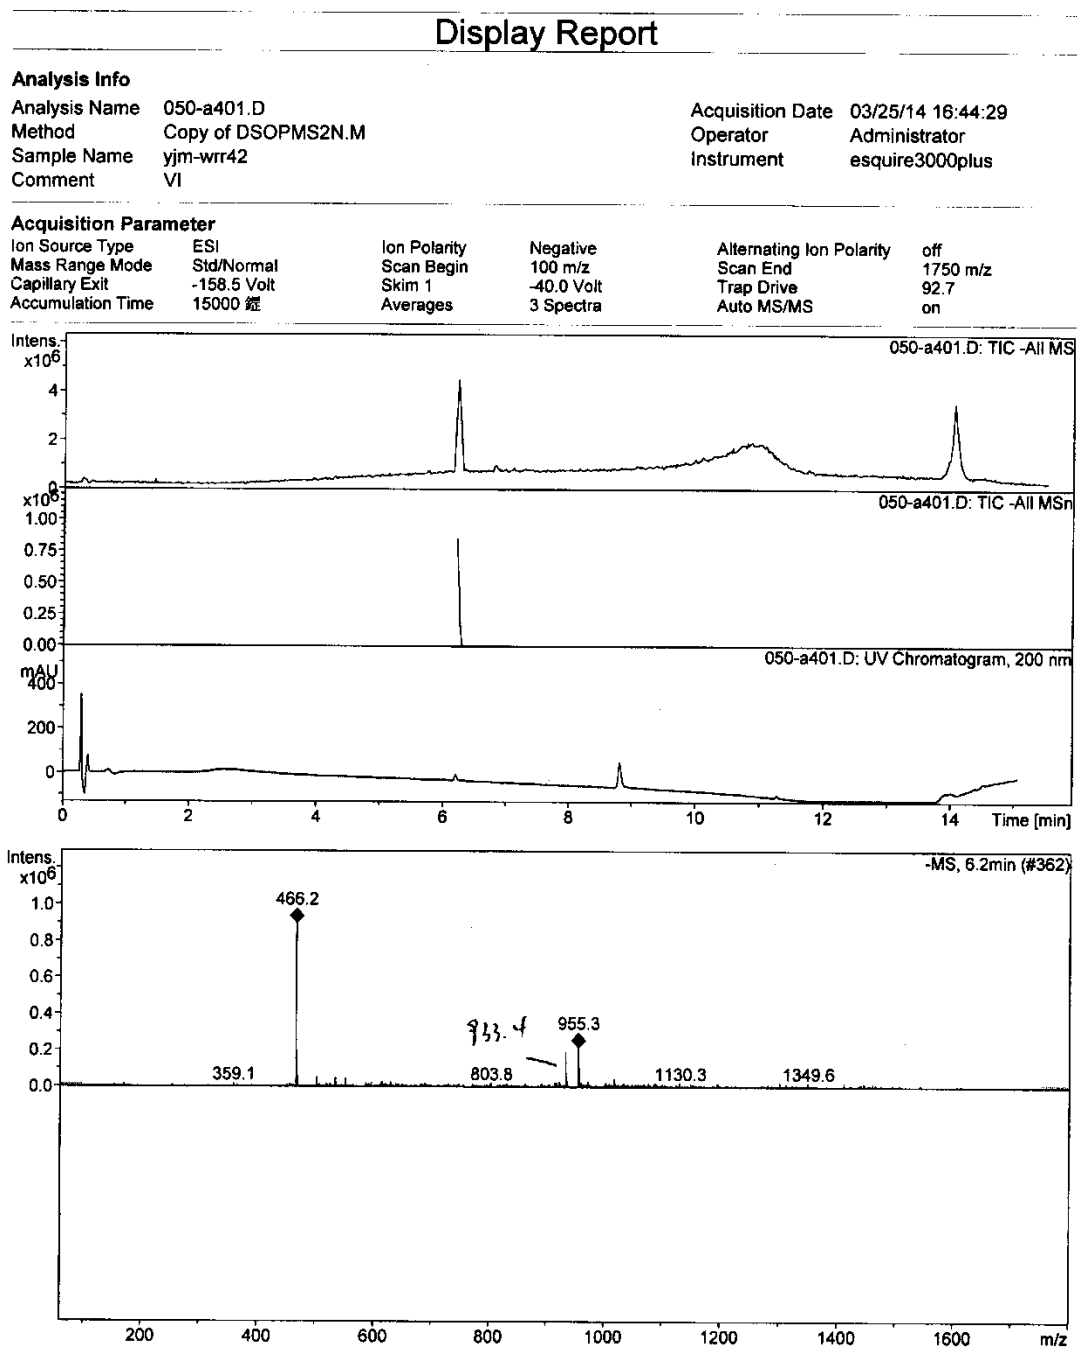

**Figure S83. (-)-HRESIMS spectrum of walsunoid I (9)**

**Elemental Composition Report**

**Page 1**

**Single Mass Analysis**

Tolerance = 5.0 PPM / DBE: min = -1.5, max = 50.0

Element prediction: Off

Number of isotope peaks used for i-FIT = 3

Monoisotopic Mass, Even Electron Ions

275 formula(e) evaluated with 1 results within limits (up to 50 closest results for each mass)

Elements Used:

C: 5-80 H: 2-120 N: 0-2 O: 0-20

wrr42

LCT PXE KE324

03-Apr-2014

15:02:37

1: TOF MS ES-

5.61e+003

wrr42\_0403 25 (0.549) AM2 (Ar,10000.0,0.00,1.00); ABS; Cm (24:37)

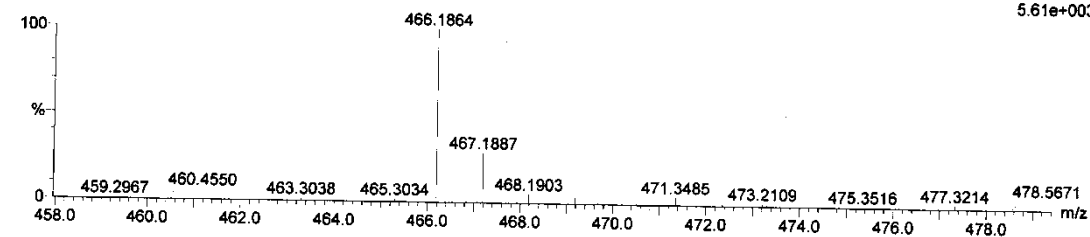

Minimum:

Maximum: 5.0 5.0 -1.5

Mass Calc. Mass mDa PPM DBE i-FIT i-FIT (Norm) Formula

466.1864 466.1866 -0.2 -0.4 13.5 130.6 0.0 C26 H28 N O7

**Figure S84.** IR spectrum of walsunoid I (**9**)

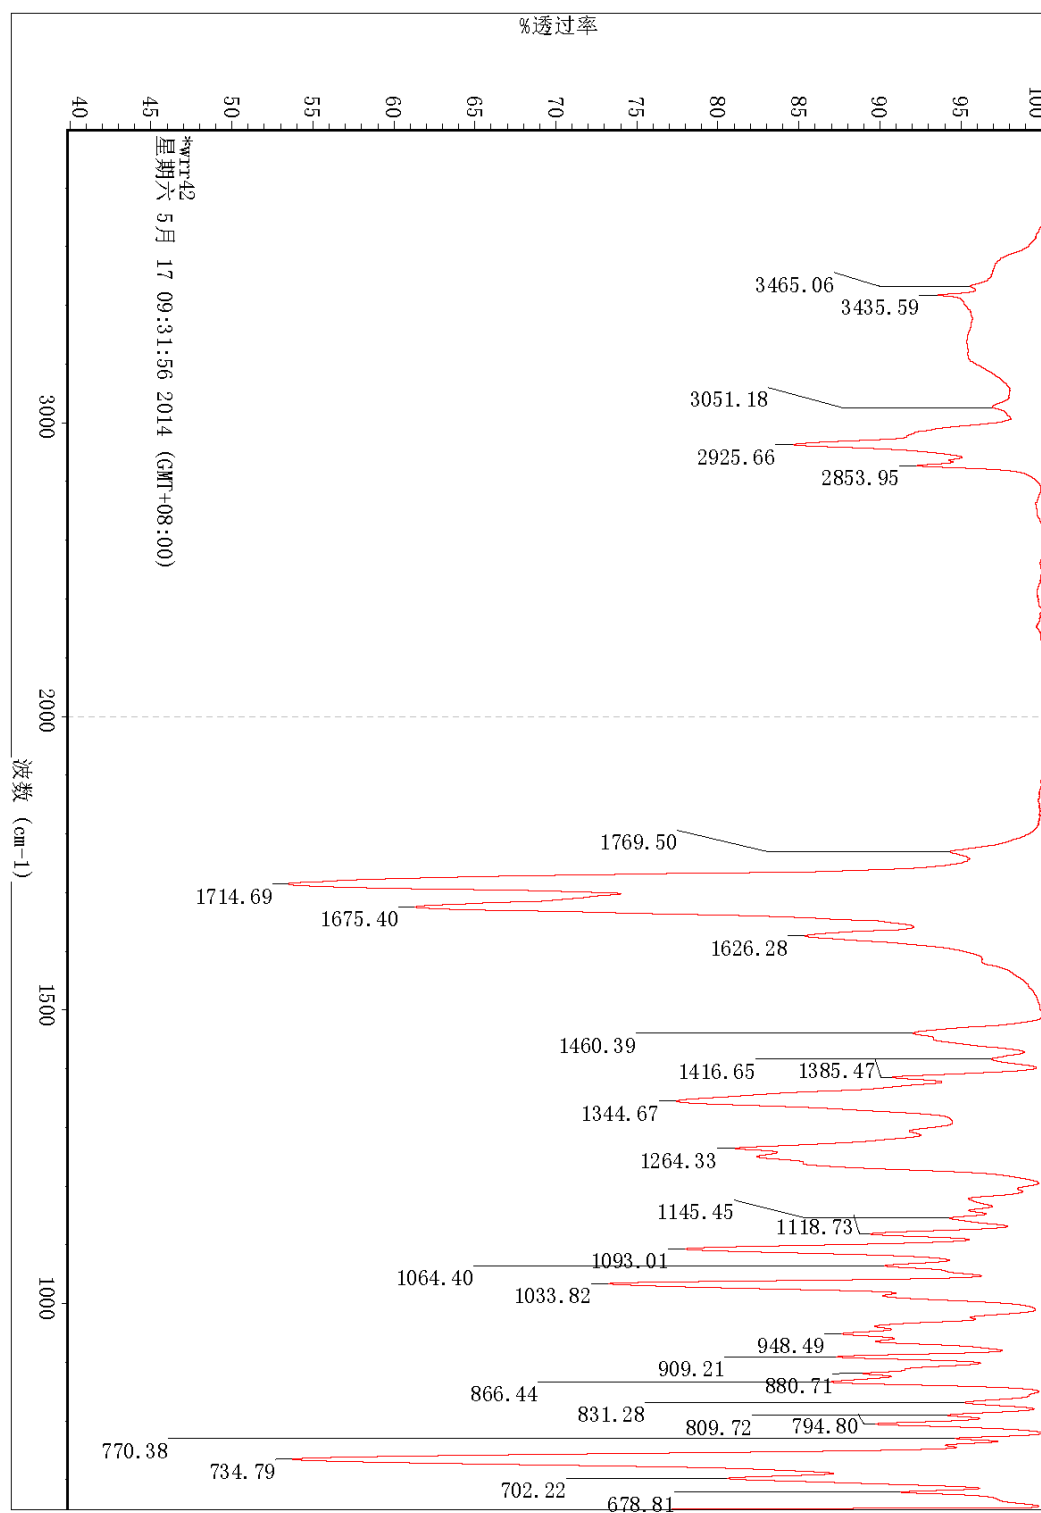

**Figure S85.**  $^1\text{H}$  NMR spectrum of compound **10** in  $\text{CDCl}_3$

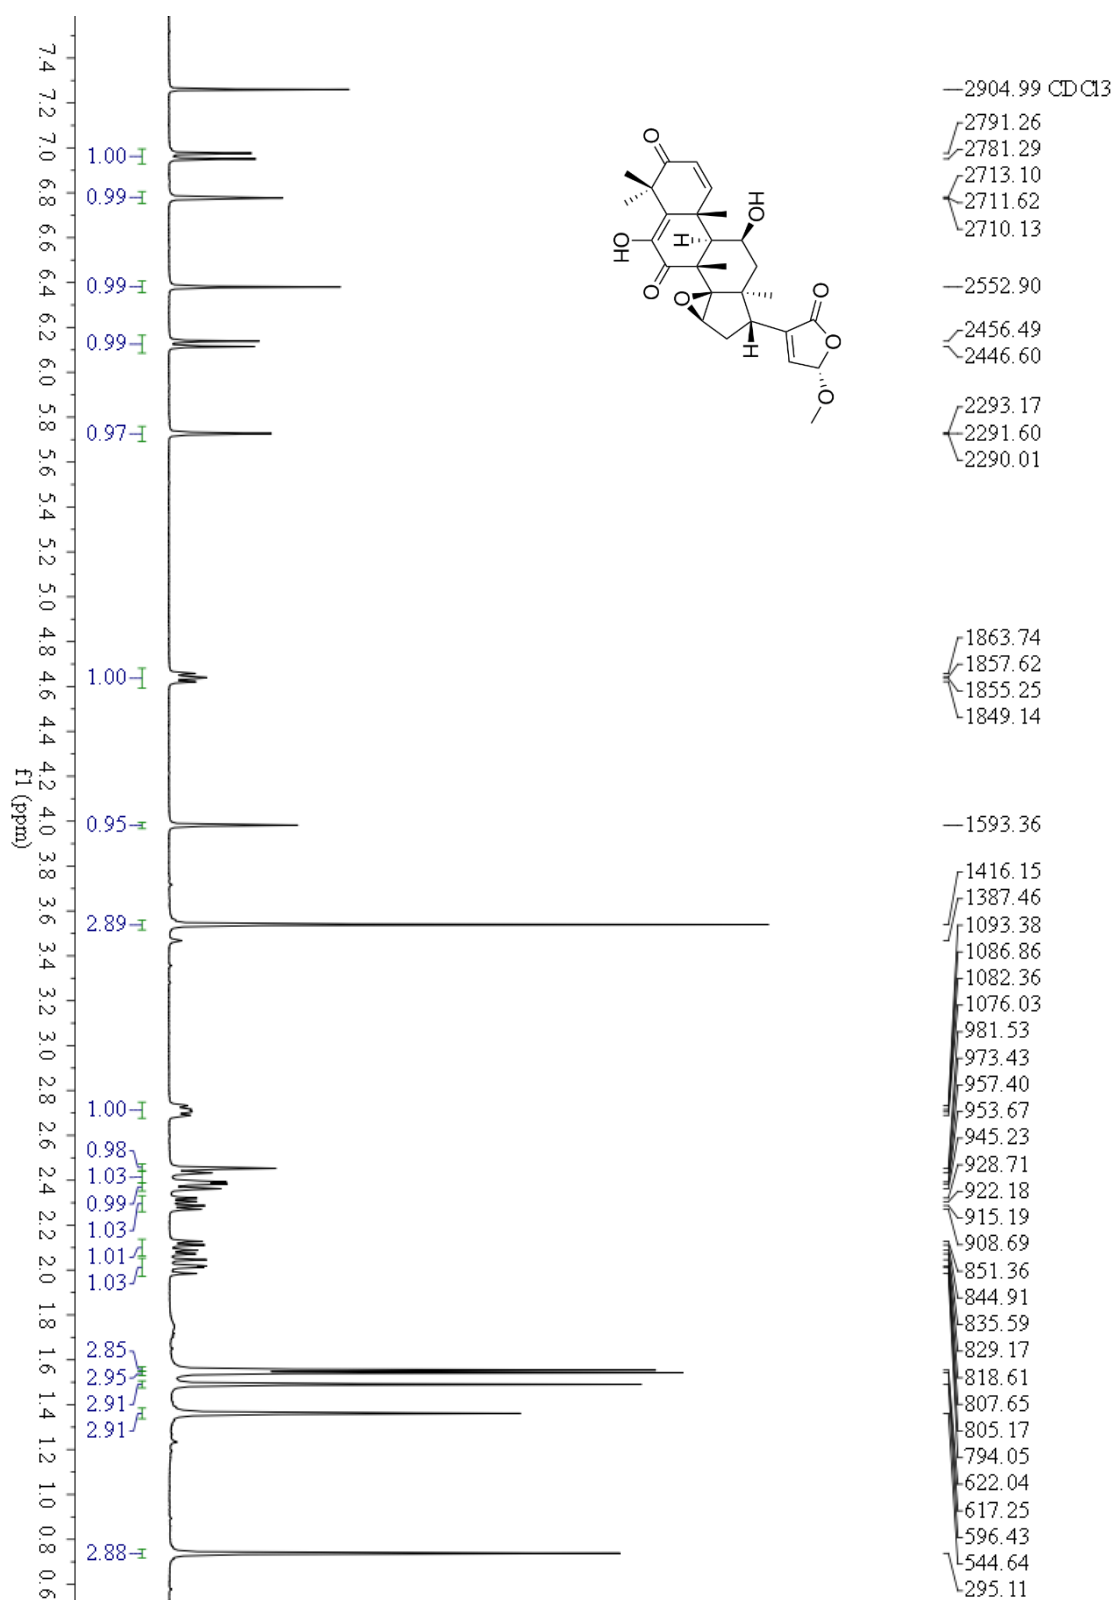

**Figure S86.**  $^{13}\text{C}$  NMR spectrum of compound **10** in  $\text{CDCl}_3$

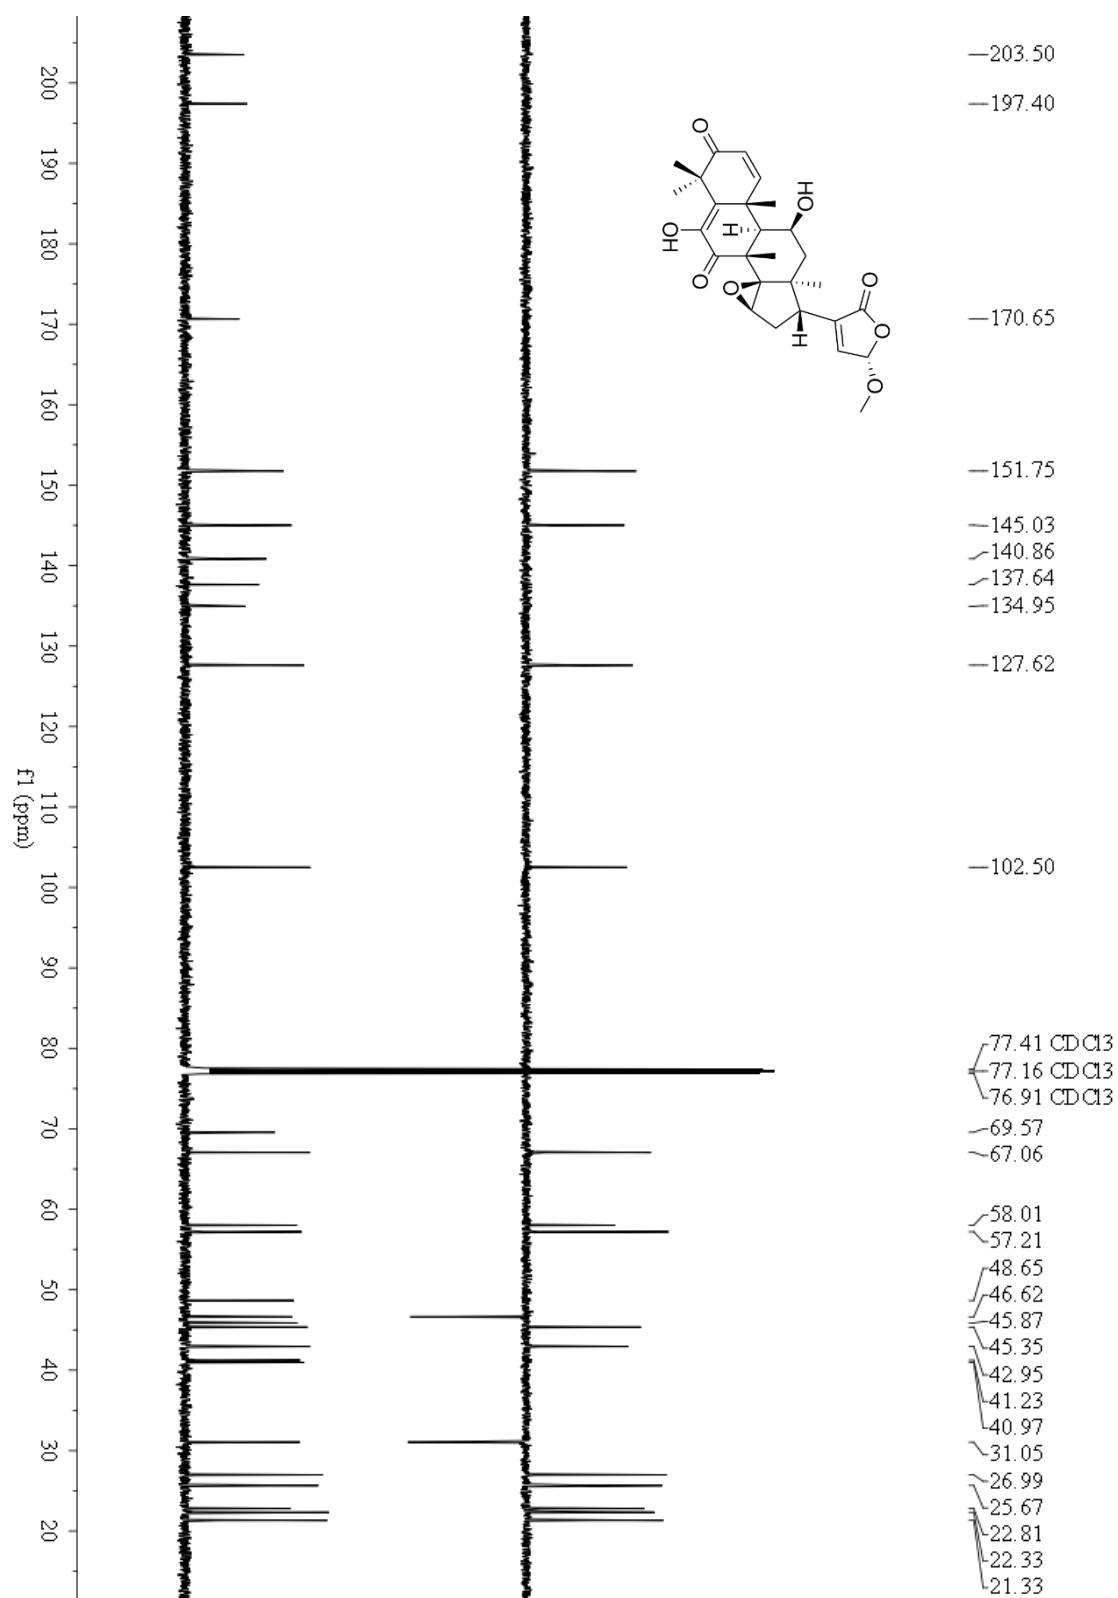



**Figure S87.**  $^1\text{H}$  NMR spectrum of compound **10** in  $\text{C}_5\text{D}_5\text{N}$

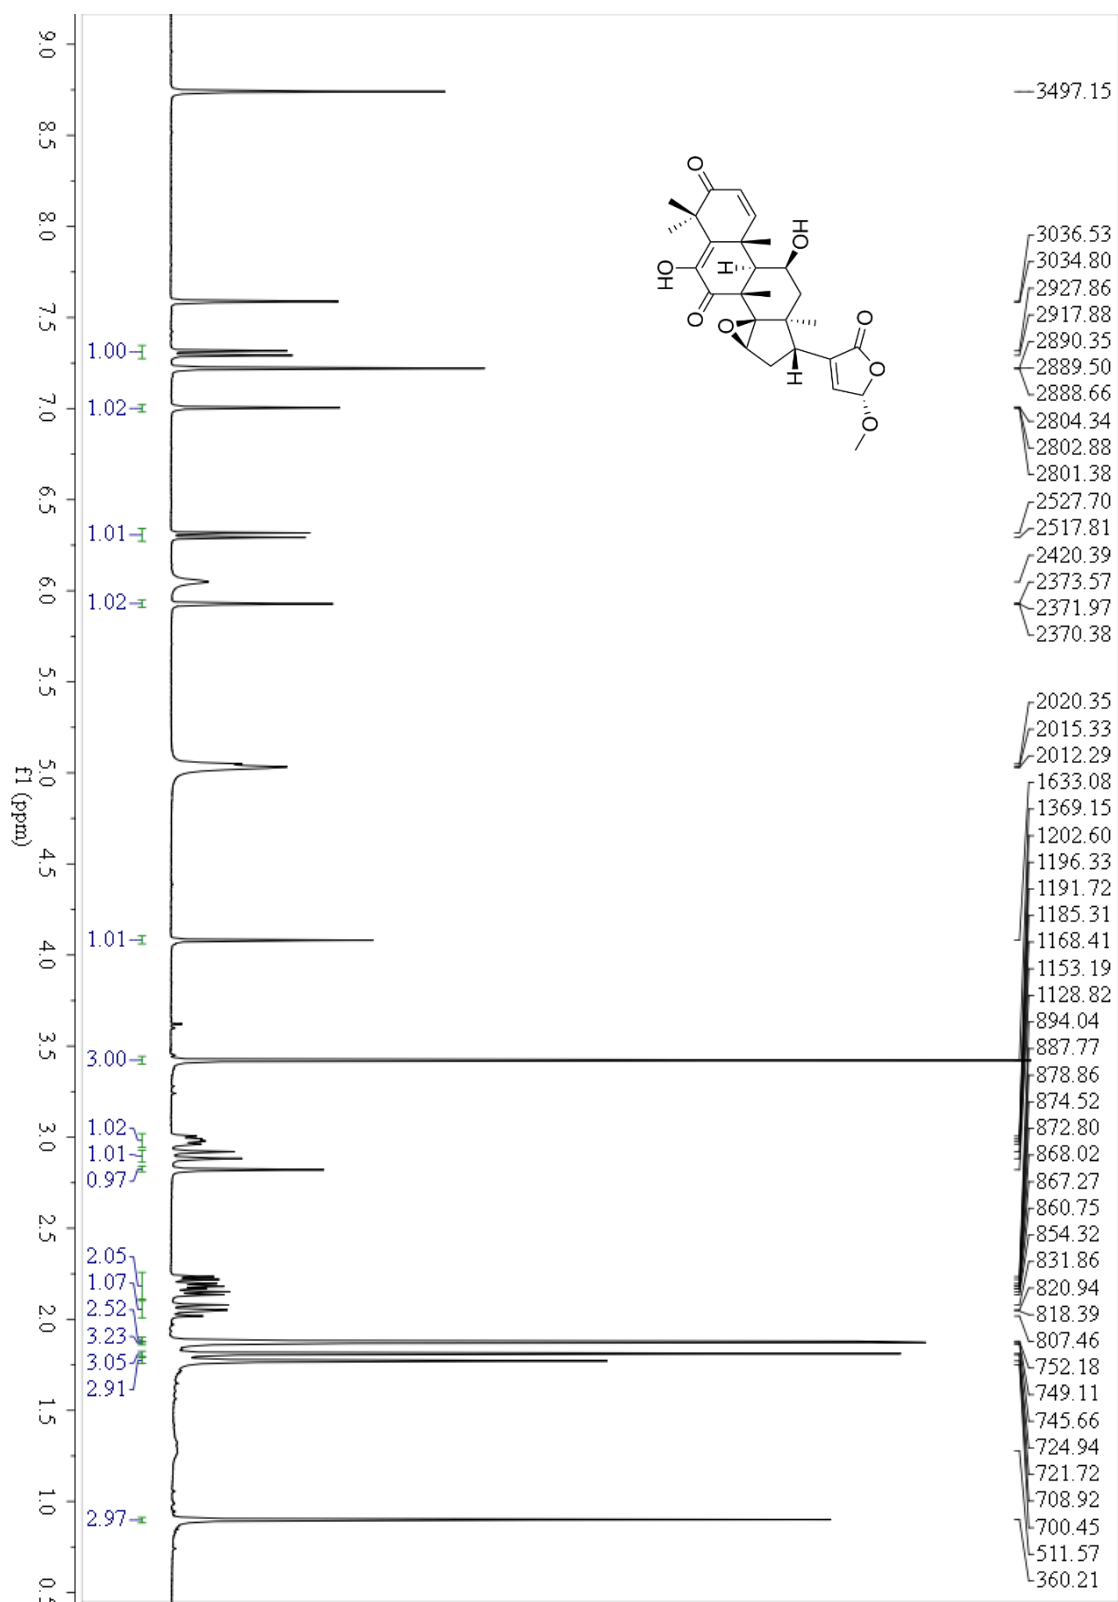

**Figure S88.**  $^{13}\text{C}$  NMR spectrum of compound **10** in  $\text{C}_5\text{D}_5\text{N}$

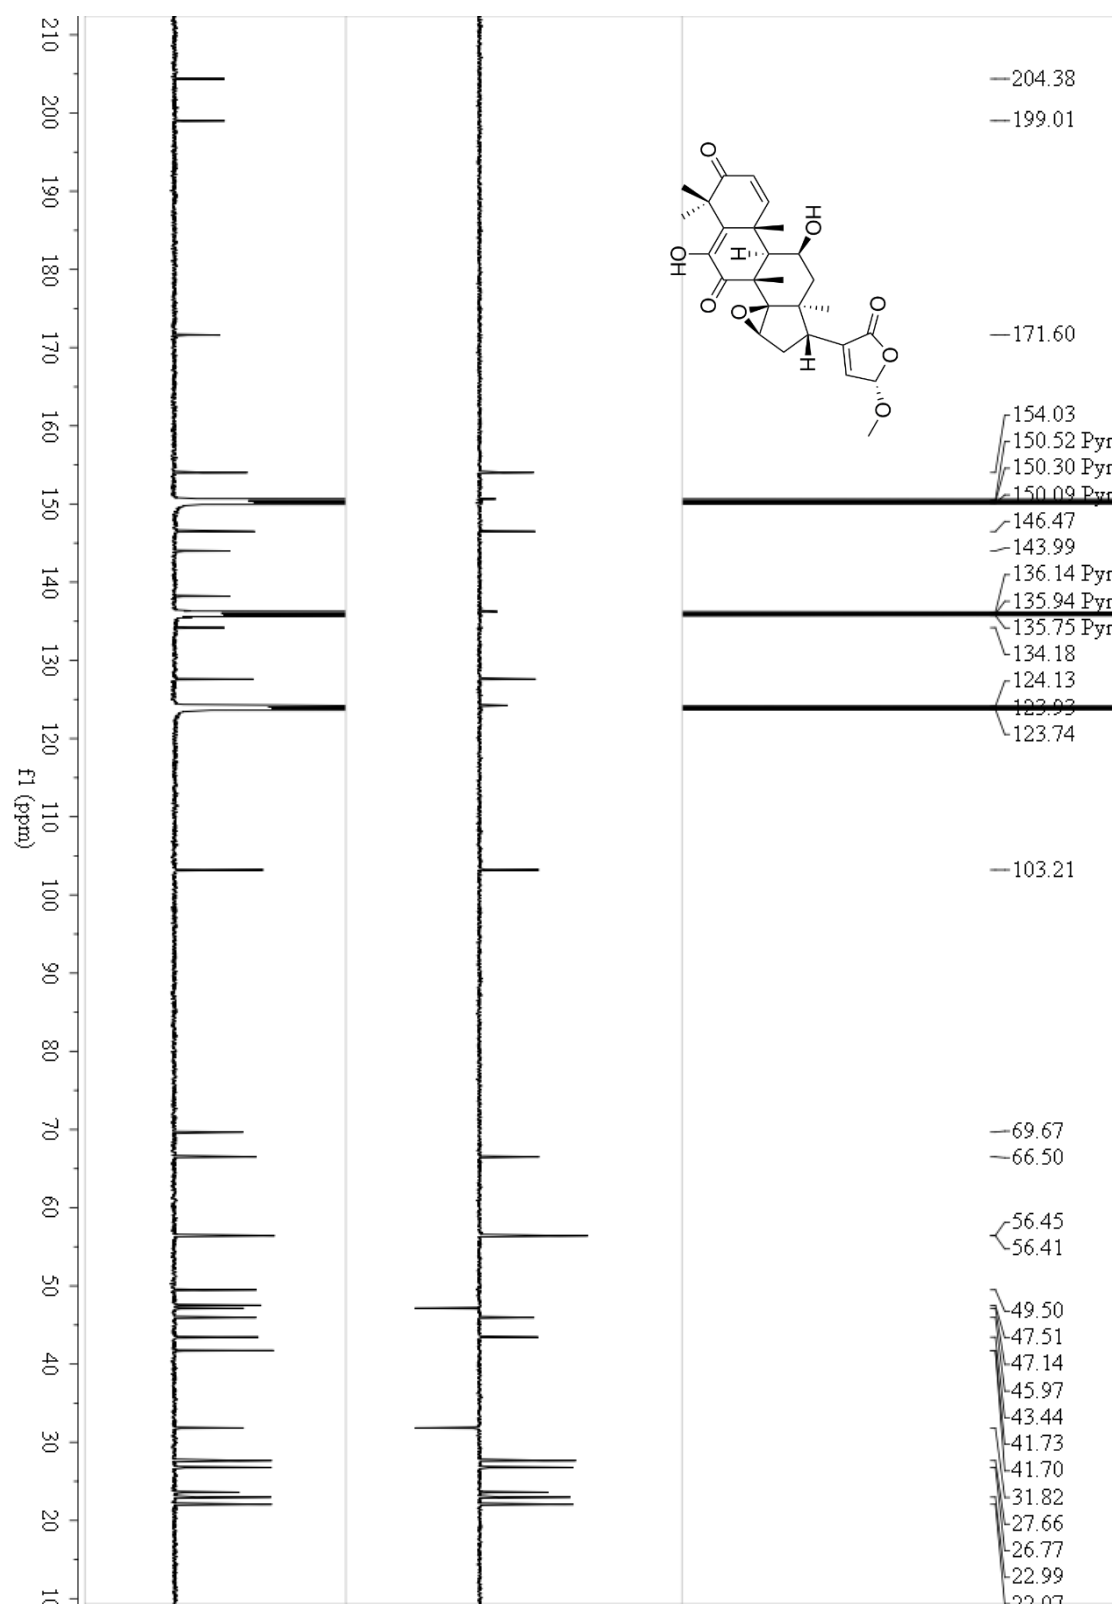

**Figure S89.** HSQC spectrum of compound **10** in CDCl<sub>3</sub>

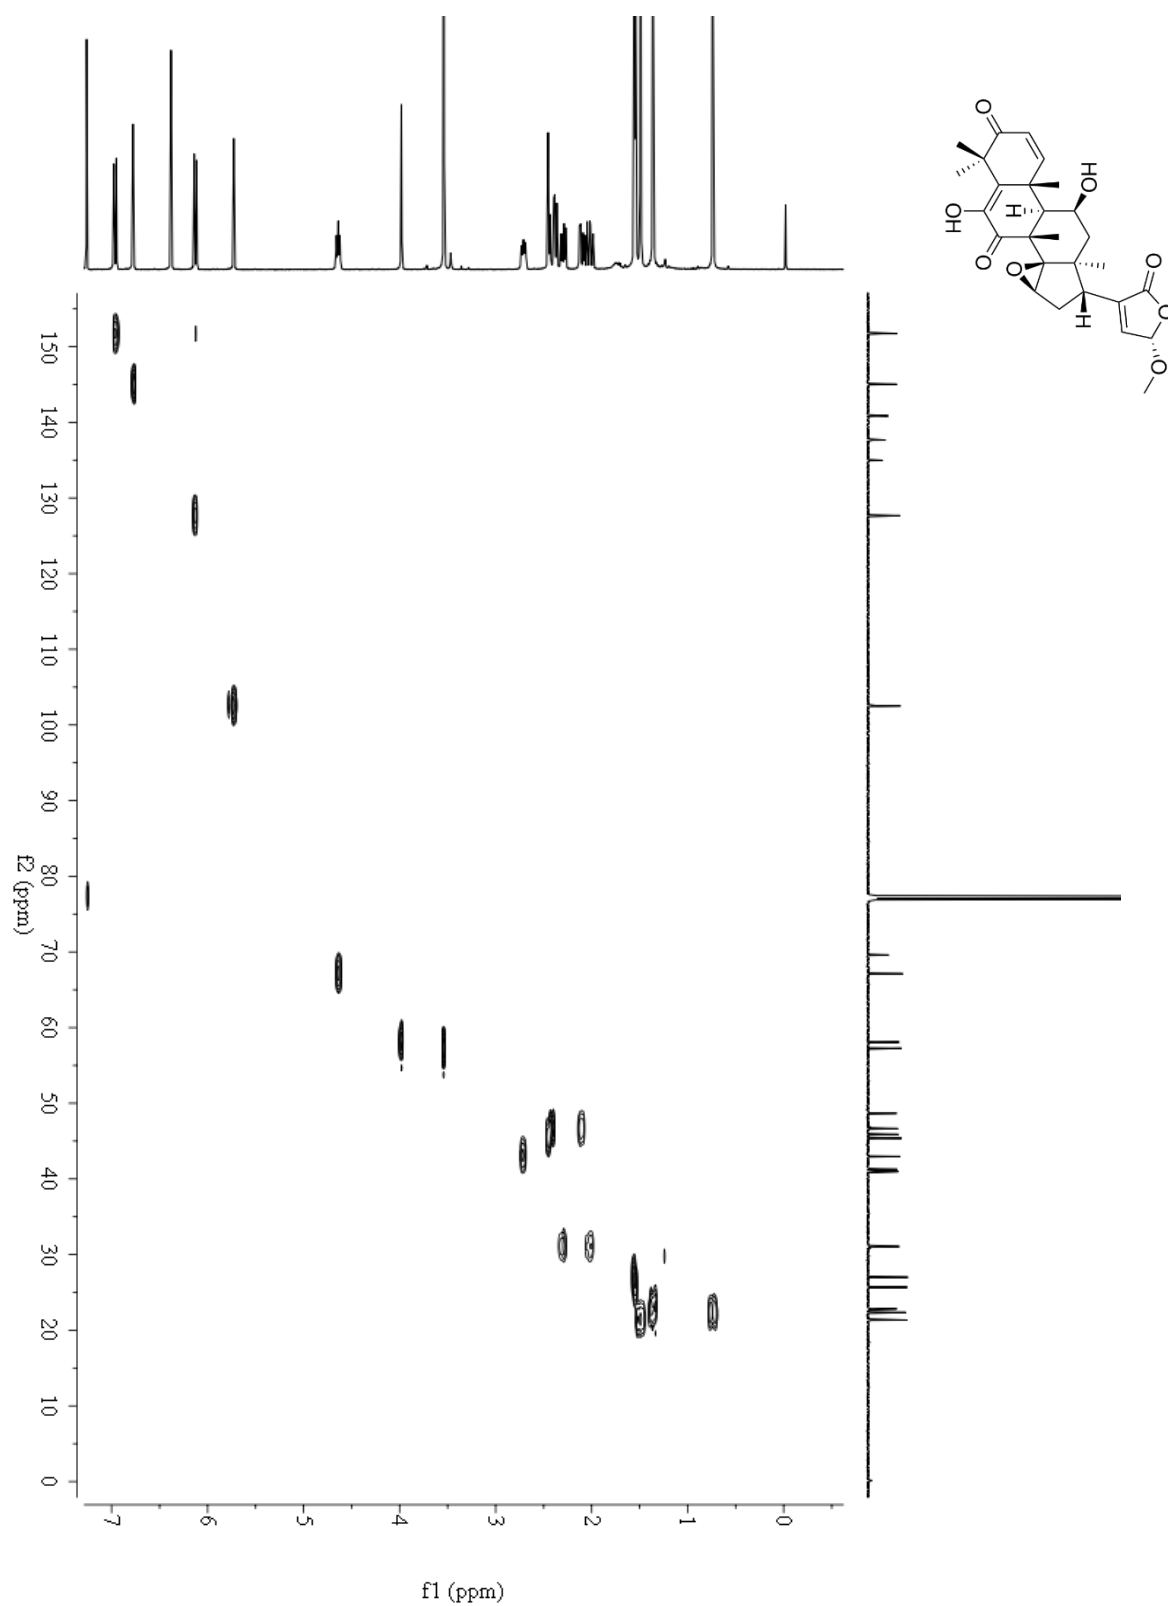

**Figure S90.** HMBC spectrum of compound **10** in CDCl<sub>3</sub>

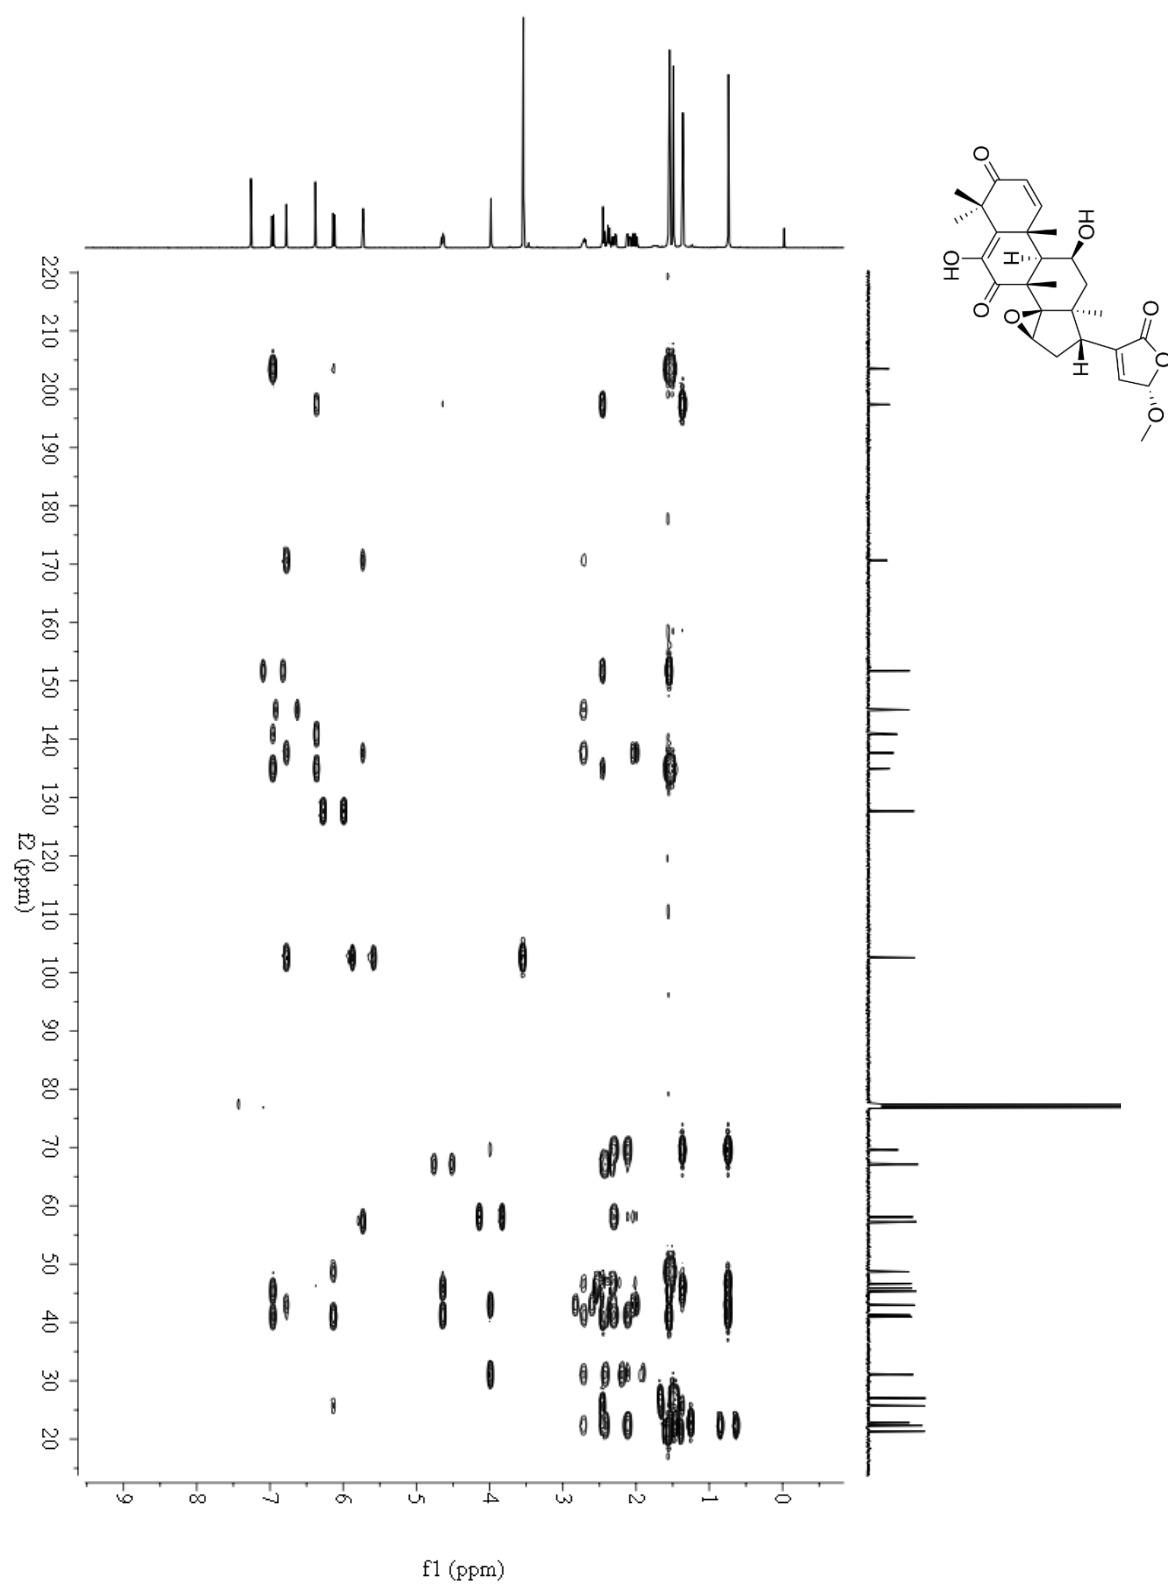

**Figure S91. (-)-HRESIMS spectrum of 10**

**Elemental Composition Report**

Page 1

**Single Mass Analysis**

Tolerance = 5.0 PPM / DBE: min = -1.5, max = 50.0

Element prediction: Off

Number of isotope peaks used for i-FIT = 3

Monoisotopic Mass, Even Electron Ions

97 formula(e) evaluated with 1 results within limits (up to 50 closest results for each mass)

Elements Used:

C: 5-80 H: 2-120 O: 0-20

wrr32

LCT PXE KE324

03-Apr-2014

15:38:10

wrr32\_0403 18 (0.372) AM2 (Ar,13000.0,0.00,0.70); ABS; Cm (14:24)

1: TOF MS ES-  
3.30e+003

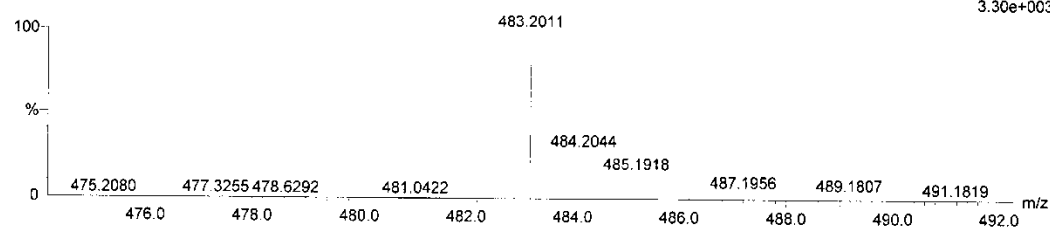

Minimum: -1.5  
Maximum: 5.0 5.0 50.0

| Mass     | Calc. Mass | mDa  | PPM  | DBE  | i-FIT | i-FIT (Norm) | Formula    |
|----------|------------|------|------|------|-------|--------------|------------|
| 483.2011 | 483.2019   | -0.6 | -1.7 | 12.5 | 104.0 | 0.0          | C27 H31 O8 |

Figure S92. LC-ESI( $\pm$ )MS analysis of 2

==== Shimadzu LabSolutions Browser Report ====

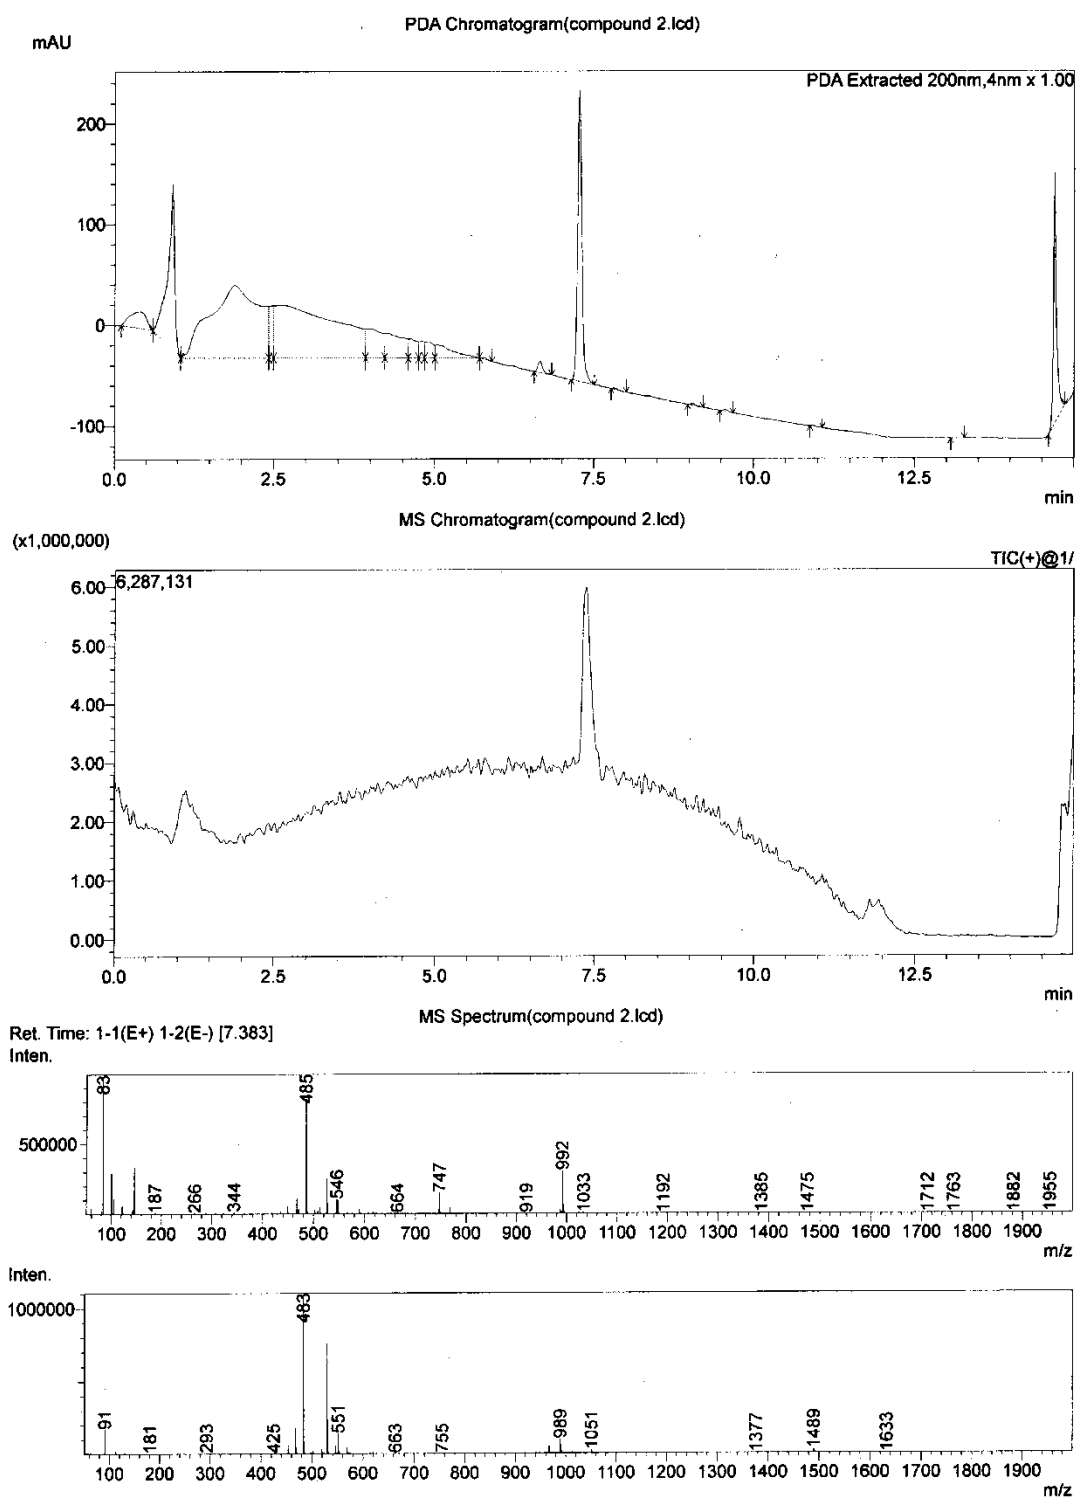

Figure S93. LC-ESI(±)MS analysis of 4

==== Shimadzu LabSolutions Browser Report ====

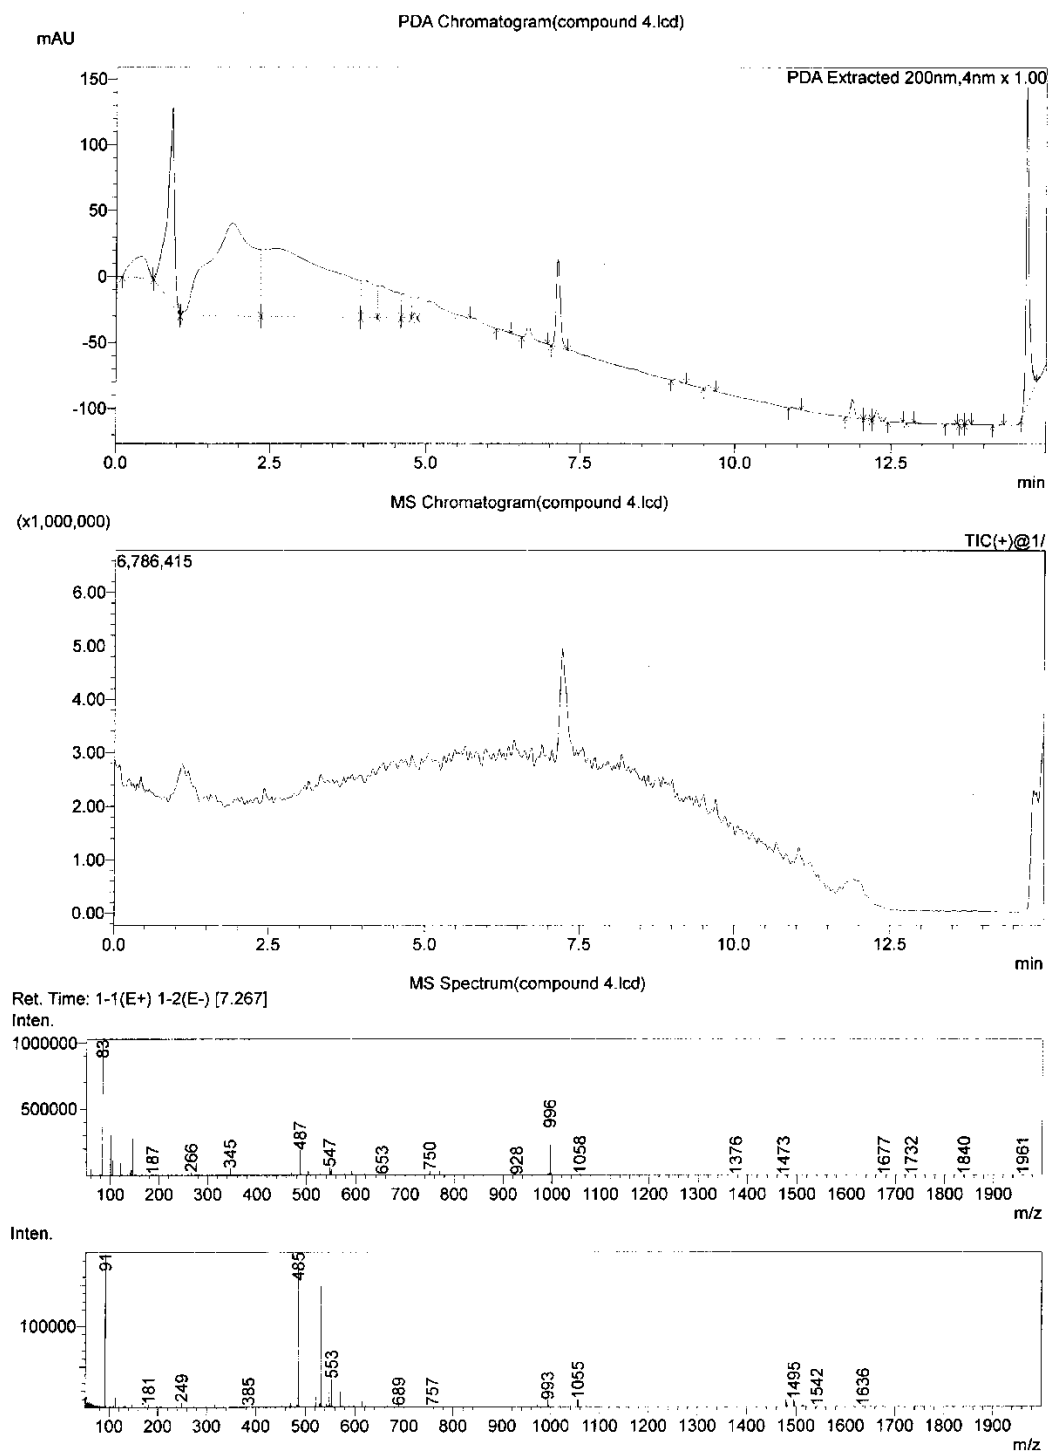

Figure S94. LC-ESI( $\pm$ )MS analysis of 10

==== Shimadzu LabSolutions Browser Report ====

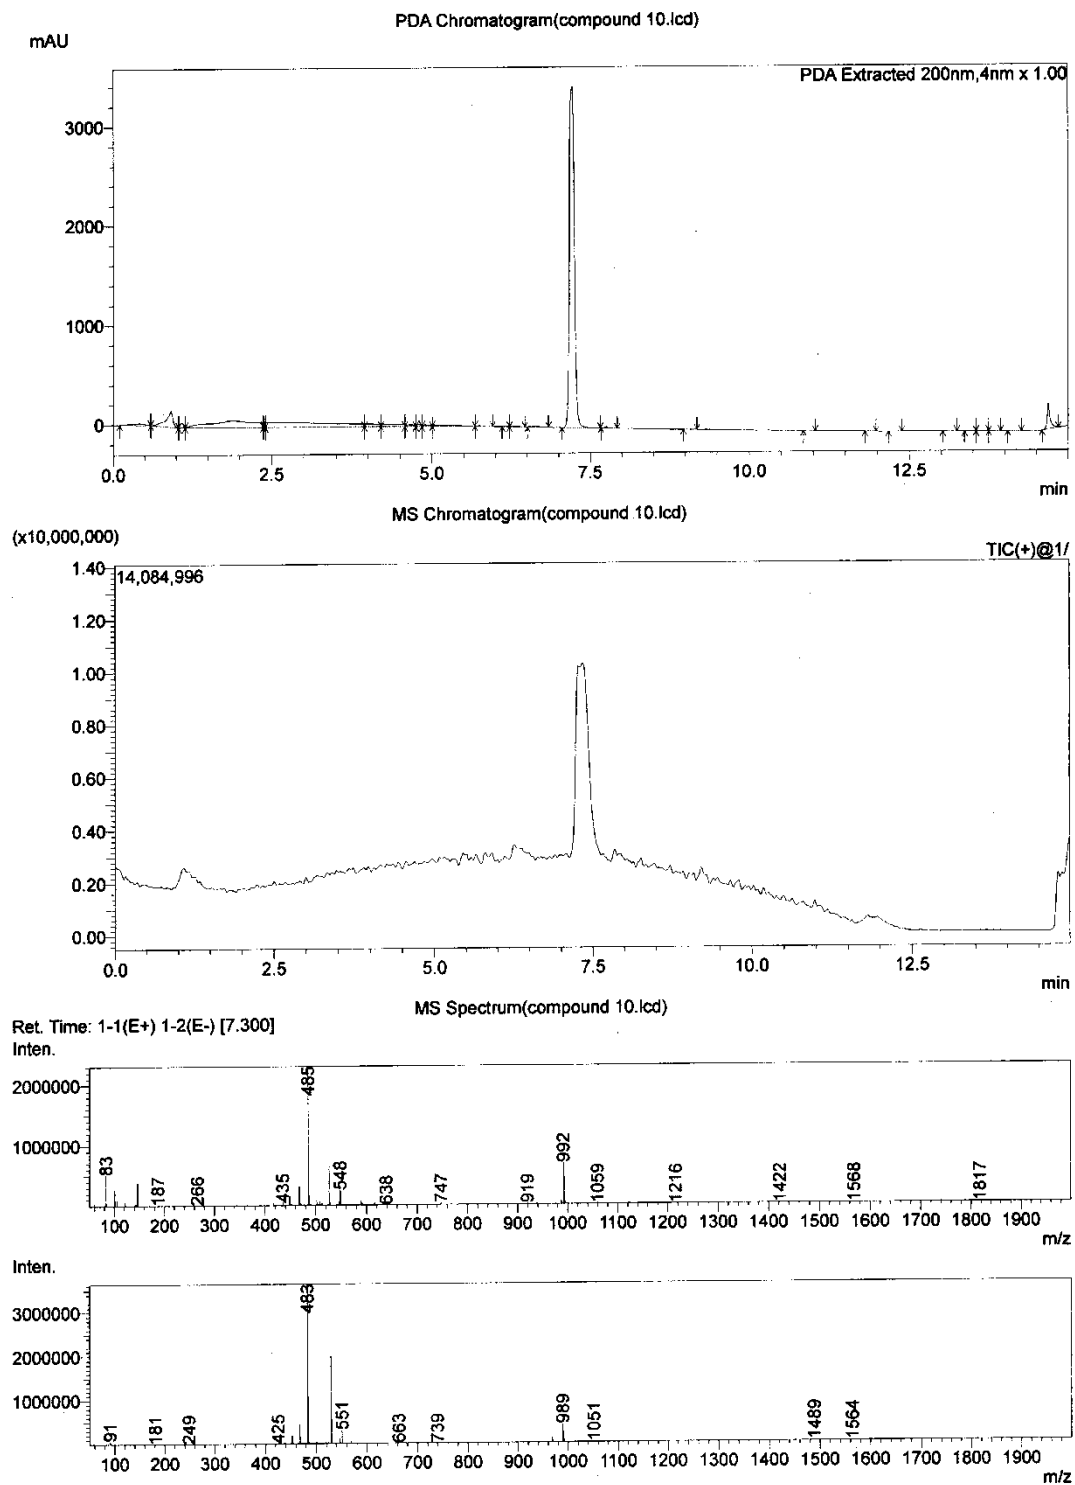



Figure S95. LC-ESI(±)MS analysis of ethanolic crude extract

==== Shimadzu LabSolutions Browser Report ====

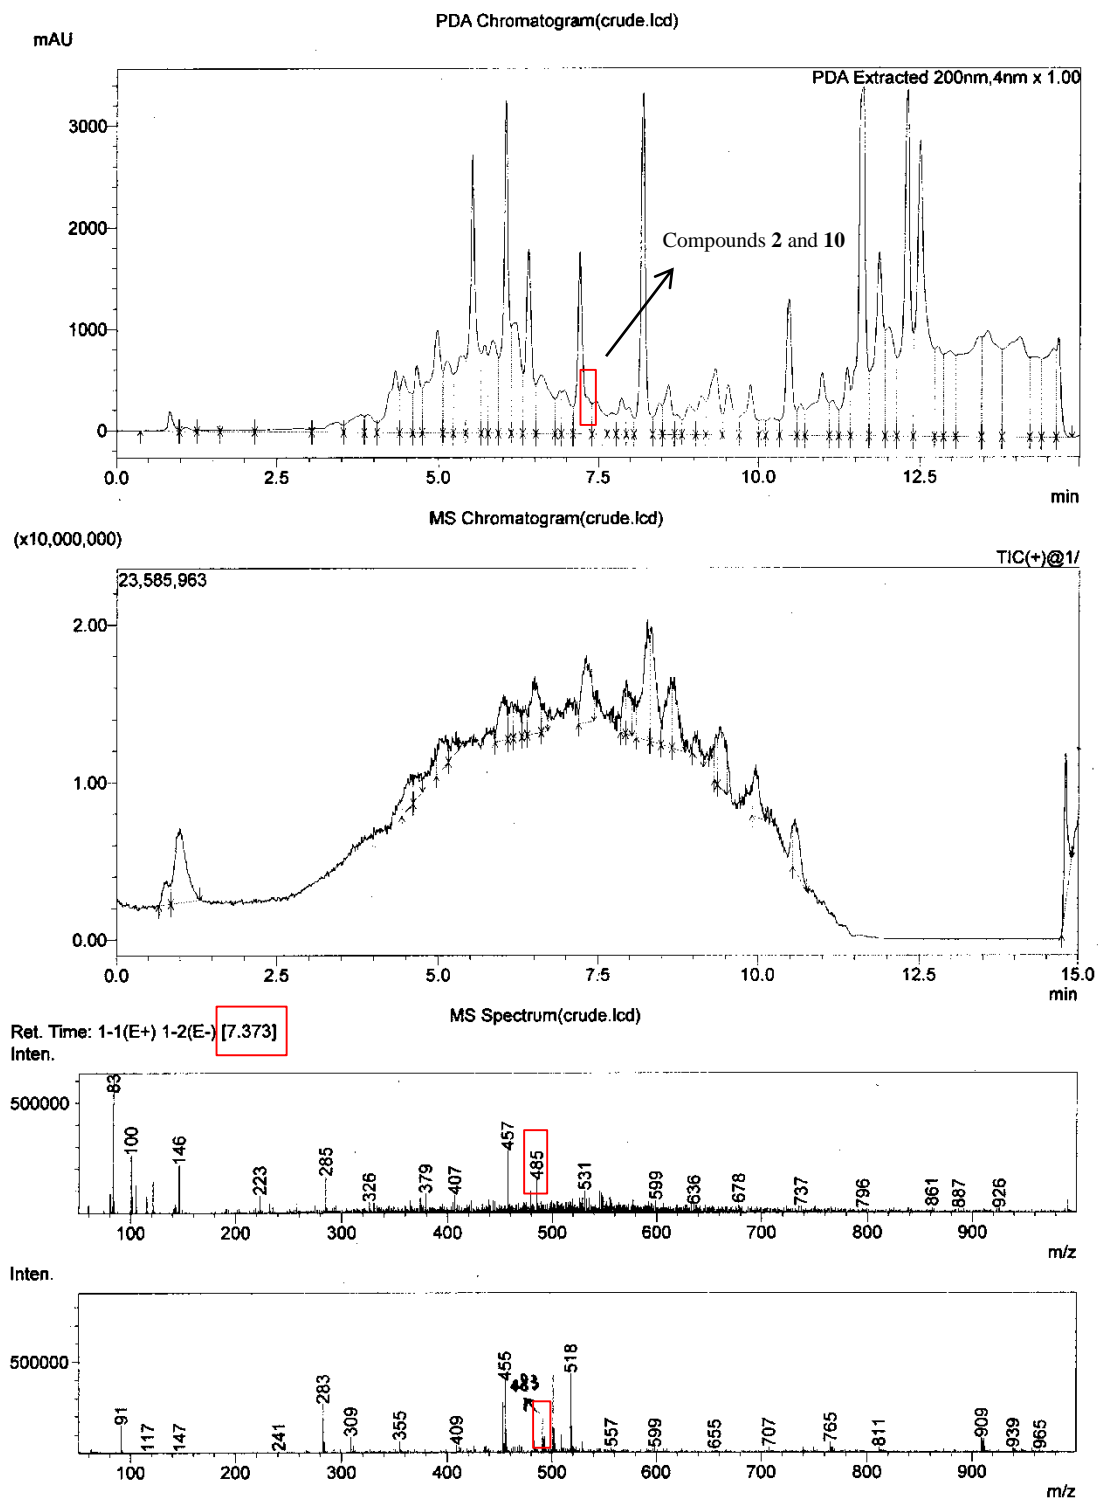

Supplement: Supplementary file 1 [file 4789546]
